# Supplementary material
Source: PubMed Central journal article supplement (PMC9747244)
Supplement: NIHMS1853537-supplement-Supplement.pdf [file NIHMS1853537-supplement-Supplement.pdf]

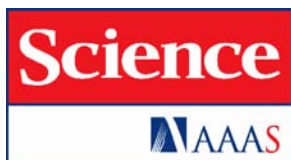

Supplementary Materials for  
**Variable Clonal Repopulation Dynamics Influence Chemotherapy Response  
in Colorectal Cancer**

Antonija Kreso, Catherine A. O'Brien, Peter van Galen, Olga Gan, Faiyaz Notta,  
Andrew M. K. Brown, Karen Ng, Jing Ma, Erno Wienholds, Cyrille Dunant, Aaron Pollett,  
Steven Gallinger, John McPherson, Charles G. Mullighan, Darryl Shibata, John E. Dick\*

\*To whom correspondence should be addressed. E-mail: [jdick@uhnres.utoronto.ca](mailto:jdick@uhnres.utoronto.ca)

Published 13 December 2012 on *Science Express*  
DOI: 10.1126/science.1227670

**This PDF file includes:**

Materials and Methods

Supplementary Text

Figs. S1 to S17

Tables S1 to S13

References

## **Materials and Methods**

### Human colon cancer cell isolation, lentivirus production, and xenograft generation

Tumor cells were isolated from tissue obtained with patient consent, as approved by the Research Ethics Board at the University Health Network. A third-generation self-inactivating lentivirus vector with GFP expressed from the human phosphoglycerate kinase promoter was used (31). Tumor tissue was dissociated using collagenase A and red blood cells were lysed using ammonium chloride. Cells were analyzed using flow cytometry (with antibodies to EpCAM, CD31, CD45, and HLA) to determine the presence of human epithelial tumor cells, as well as contaminating non-epithelial cells. Isolated colon cancer cells were plated as described (32); viral particles were added at a multiplicity of infection of 1 to 10 for 16 to 40 hours.  $5 \times 10^4$  to  $2 \times 10^5$  cells were injected under the renal capsule of 8 to 10 week old non-obese diabetic/severe combined immune deficiency (NOD/SCID) and/or NOD/SCID/IL2R-gamma-null (NSG) mice. Animal experimentation followed protocols approved by the University Health Network Animal Care Committee. We assessed the presence of tumors by palpation. Starting 30 days following injection, we palpated mice every two weeks to monitor for tumor growth. When tumors were readily identified by palpation (generally, at this time they reached 5-10% of mouse body weight and parallel mice harbored tumors of approximately the same size) mice were sacrificed, tumors excised and weighed. Single cells were isolated from the tumor and  $5 \times 10^4$  to  $2 \times 10^5$  cells were re-injected to generate secondary tumors; this procedure was repeated for each transplant. Cells derived from xenografts were analyzed for the expression of EpCAM, HLA, and mouse H2Kd to ensure human cells were re-transplanted and to exclude contaminating mouse cells. Based on flow cytometric analysis, we estimate >80% of cells are tumor-derived.

### Flow cytometry and fluorescence activated cell sorting

Cells were isolated from tumor tissue and passed through a 40- $\mu$ m cell strainer to obtain single cells. Cells were stained with antibodies to human CD44 (Beckman Coulter) and CD133/1 (Miltenyi). EpCAM was used to mark epithelial cells; CD45, CD31, and mouse H2K (Beckman Coulter) were used to exclude hematopoietic, endothelial, and mouse contaminating cells, respectively. Flow cytometry analysis was performed on the BD™ LSR II or FACSCanto II (BD Biosciences). For limiting dilution analysis, GFP-expressing cells were sorted using FACSaria or MoFlo cell sorters. SYTOX Blue (Molecular Probes, 1  $\mu$ M) or propidium iodide (Invitrogen, 1  $\mu$ g/mL) was added to exclude dead cells.

### Copy number alteration analysis

Genomic DNA from primary human tumor samples and xenografted tumor cells was isolated using the Qiagen Genra Puregene Tissue kit. Tumor cells were profiled using flow cytometry to ensure absence of mouse contaminating cells and the presence of human epithelial tumor cells in the xenografted tumors. Based on flow cytometric analysis, we estimate >80% of cells are tumor-derived. DNA was subjected to copy number analysis using Affymetrix 6.0 SNP arrays. SNP array data was analyzed using a previously described workflow, including reference normalization (33), circular binary segmentation (34), and data were visualized in dChip (35). Samples lacking gross alterations were set as diploid reference samples in order to calculate copy number.

### Targeted deep sequencing

Targeted deep sequencing, as previously described in (36), was used with the following modifications to the protocol: genomic DNA (500 ng) for each sample was sheared using the

Covaris S2 ultrasonicator (Covaris) to produce fragments of 3000 bp in length. Sheared products were purified using Zymo-5 columns (Zymo Research) and concentrated to a volume of 8-10  $\mu\text{L}$ . Products were analyzed on a BioAnalyzer HS dsDNA chip (Agilent Technologies) to confirm proper shearing and quantified using Qubit® Fluorometer (Life Technologies). Up to 8  $\mu\text{L}$  sheared DNA was mixed with 42  $\mu\text{L}$  of Template Master Mix: 11.66  $\mu\text{L}$  10x High Fidelity Buffer (Invitrogen), 3.12  $\mu\text{L}$   $\text{MgSO}_4$  (Invitrogen, 50 mM), 3.12  $\mu\text{L}$  dNTP (NEB, 10 mM), 8.93  $\mu\text{L}$  Betain (Sigma, 4 M), 4.46  $\mu\text{L}$  RainDance Droplet Stabilizer (RainDance Technologies), 8.93  $\mu\text{L}$  DMSO, and 1.79  $\mu\text{L}$  Platinum High Fidelity Taq (Invitrogen, 5 U/ $\mu\text{L}$ ). If necessary, nuclease free water was used to bring final volume to 50  $\mu\text{L}$ . Microdroplet PCR (37) was used to amplify 71 kb of mutational hotspots in 42 cancer genes (36). Universal PCR was used to make sequencing libraries by incorporated the Illumina adaptor sequences and a unique molecular barcodes onto the PCR products for each sample. Samples were quantified using the Qubit® Fluorometer and diluted to 10 ng/ $\mu\text{L}$ . Equal volumes of up to 12 samples were pooled together. qPCR was performed on the Eco Real-Time PCR System (Illumina) using the Kapa Illumina Library Quantification Kit (Kapa Biosystems).

Pooled libraries were sequenced on the Illumina MiSeq instrument (Illumina) using a 2X150 paired end protocol. Demultiplexed FASTQ files were generated from on instrument basecalls using Illumina's CASAVA software. The sequences were aligned to the human genome (hg19/GRCh37) using the Novoalign (Novocraft) short read aligner. Single nucleotide variants and short indels were identified using the Genome Analysis Toolkit (38) with standard filtering and annotated with ANNOVAR (39). Variants were removed for the following reasons: the variant fell outside the target region, there was not adequate coverage (100x) in the primary or reference sample, the variant in a xenograft samples arose due to differences between the mouse and human genomes.

### Exome sequencing and variant calling

Genomic DNA was sonicated (Covaris) to generate fragments with size ranges of 300-500 bp. Fragmented DNA was then used as input for genomic library preparation using the NEBNext DNA Sample Preparation Kit (New England Biolabs); libraries were prepared manually. 500 ng of adapter-ligated DNA libraries were hybridized to the SureSelect Human All Exon 50Mb kit (Agilent) biotinylated RNA library baits for 72 hours. The enriched fragments were captured using streptavidin beads and then sequenced 2X101 bp Illumina HiSeq 2000 sequencing platforms. Intensities and basecalls were converted to FASTQ formatted reads using Illumina CASAVA which includes demultiplexing for barcoded samples. The FASTQ files were aligned to the UCSC hg19 human reference using Novoalign V2.07.14 and were further processed (i.e. BAM file conversion and sorting, duplicate read removal, read filtering) using Picard and SAMTools. Metrics and coverage data were generated using BEDTools. Variants were called using GATK v1.3.16, and samples were processed together through this pipeline as a set in accordance with recommended GATK best practices. The GATK workflow involved recalibration of base qualities and local realignment prior to SNPs and indels calling. Somatic candidates were initially identified as calls with a differing genotype between a reference (normal tissue) and tumor sample (always a pairwise comparison). Candidate somatic calls were then passed through in house scripts to filter based on depth of coverage, quality, frequency and for xenograft samples; likelihood to be due to differences in the human and mouse reference genome.

### Passenger DNA methylation diversity analysis

Small (1-2 mm<sup>2</sup>) tumor areas were microdissected from primary or xenograft microscope slides and 6 to 8 epialleles were sampled from each region by bisulfite sequencing of cloned PCR products (40). Diversity was measured as the number of unique 5' to 3' DNA methylation patterns

or as a pairwise distance between the epialleles within each small region, with more diverse populations having more unique epialleles or greater pairwise distances. Each tumor was represented by the average values for their microdissected regions (between 1 and 6 regions per tumor).

### Passenger Epialleles

The sequences for the BRS and LOC epialles are provided in (40). Two new epialleles that show age related methylation in normal tissues, and are not in genes expressed in colon are illustrated below. These epialleles are autosomal (both on chromosome 19) and single nucleotide polymorphisms (in red) were used to distinguish between maternal and paternal alleles. Diversity (unique patterns or pairwise distances) was separately calculated for each allele and then averaged. CT54 was from a female patient, but its BRS locus (X-chromosome) had a polymorphism that distinguished maternal from paternal alleles. Bisulfite treated sequence with primer sites is underlined; converted “C” represented as “T”, and CpG sites capitalized.

ABHD8: 9 CpGs

gggTttgaTTtTtaTaaaggtgtagTTatCGTtgggaTtCGaCGTtTtTtagtggTTTTaCGgCGttggggggCGtgTTT  
agTaggTaaTagaa(g/a)ataTCGtCGgtTaTTTCGgtTagTatggtgtgtTTtgtgagtg

ZNF471: 14 CpGs

gttTTtggggTTtgggagggaaaCGCGCGaCGgTtgagTTtCGgtgtgagtaCGCGtggggTtttgaCGTtgtTgtg  
TTtTtgtgatCGCGatgtTattCGgagCGCG(g/t)TTtTtgtgTTagtTCGtgggagtgtTattatTttTtgtg

### Southern blot analysis

Tumor genomic DNA was extracted and 5-35 µg was digested with BamHI. For several experiments, DNA was also digested with EcoRV to confirm the clonal pattern. After

electrophoresis and transfer to a positively charged nylon membrane, DNA was hybridized to a GFP probe. Samples were also digested with EcoRI, which cuts out the GFP, to confirm presence of the correct fragment. Three observers independently analyzed the presence of bands on Southern films and consensus was reached for insertion mapping.

#### Tracking single cells: methodology

To monitor the output of single CRC cells within the captured genetic clone over successive rounds of tumor formation, the progeny of single CRC cells was followed by carrying out clonal tracking experiments through the use of lentiviral integration site mapping by Southern blotting. A GFP sequence is integrated into the cellular genomes by the lentivirus, which allows it to be replicated alongside the host cells' genomes during cell division. Progeny descending from a labeled cell can be readily identified by the same viral insertion. The Southern technique conveniently requires the presence of at least  $3 \times 10^4$  cells for detection, ensuring that the detected band is derived from a cell with significant proliferative output, thus eliminating background noise associated with the output of cells that have limited proliferative potential. Generally, 10 to 30  $\mu\text{g}$  of total tumor DNA was analyzed for Southern blot analysis. A typical mammalian cell has approximately 10 pg of DNA, therefore we estimate that  $1 \times 10^6$  to  $3 \times 10^6$  tumor cells were analyzed per lane in Southern blots. With the detection limit of  $3 \times 10^4$  cells, a clone would have to comprise about 1% to 3% of the analyzed tumor to be detected by Southern blot. Here, it is assumed that proliferation is correlated to the size of a marked clone, although other factors, including cell death, may play a role. Southern blotting is also quantitative, enabling the distinction between bands that are detected at low level versus those that are abundant. Serial transplantation combined with single-cell marking enabled us to track the longevity of the output of single CRC cells, including an assessment of their proliferative potential as measured by the size of their descendants, and tumor

re-generation potency as measured by serial transplantation. Since  $5 \times 10^4$  to  $2 \times 10^5$  primary tumor cells were injected at each serial transplant, representing at least 100-fold dilution of the isolated tumor cells, tracked tumor cells would be diluted out of existence if not for proliferation. Thus, by transplanting a limited number of CRC cells to challenge the system and by tracking their progeny using Southern blotting, we were able to measure the output of the most potent CRC cells. GFP-marked tumor cells were transplanted in two to six serial xenograft assays in NOD/SCID and NSG mice. Results from both strains of mice were similar and were pooled for analysis. Genomic DNA was isolated from the whole tumor at each transplant to assess the distribution of lentivirally tagged cells and two different restriction enzymes were used for Southern blotting to independently confirm the results. Lentiviral integrations were identified as distinct bands of unique size on a Southern blot. We assigned each band an identity number and recorded its presence in the tumor DNA of serial transplants. When a band was detected on the Southern blot at any of the exposure times, it was scored as positive and interpreted to represent outgrowth of a CRC cell (referred to as a 'LV clone' from now on). If bands of different sizes were consistently seen together but never separately across three or more recipients over more than one transplant, we assumed that they represented one clone with multiple lentiviral integration sites and scored the bands as one clone.

As a second method of detecting multiple inserts per cell, we carried out limiting dilution analyses, where GFP<sup>+</sup> tumor cells were separated using FACS prior to injection at limiting doses into animals (data not shown). Using Poisson distribution statistics, cell doses at which at least 37% sites did not score positive for the presence of tumors were assumed to be generated by one cell. For all limiting dilution experiments, tumor DNA was isolated and analyzed by Southern blotting; we analyzed 335 tumors for sample CT38, 192 tumors for CT54, and 151 tumors for CT59. If bands of different sizes were consistently seen together but never separately in tumors that were generated using a limiting cell dose, these bands were scored as one LV clone with multiple insertions. Three



observers independently analyzed the presence of bands on Southern films and consensus was reached for insertion mapping.

#### Procedure for defining LV clone types

LV clone types were defined within the limits of each experiment. Type I, long-term persistent LV clones (purple arrowhead, Fig. 2A) were defined if the band was detected in every tumor that was re-transplanted further over an entire experiment; for example, (i) if the tumor was transplanted twice and the band is present in both transplants, it is classified as Type I, as well as (ii) if the tumor is transplanted six times and the bands are present in each transplant, including the tumor that was used for further transplantation, the band or clone was classified as Type I. Type II LV clones with limited or short-term tumor-initiating capacity (blue arrowhead, Fig. 2A) were defined by the presence of bands over multiple passages in mice, including detection in 1° and 2° recipients, but the characteristic absence in the last transplant. The number of transplants in which Type II clones were detected was unique to each experiment, but if the band was detected in at least two transplants and was not detected again, including the last transplant, it was characteristic of Type II behavior. Type III transient LV clones (green arrowhead, Fig. 2A) were defined by being detected in 1° recipients, but were not detected again over the entire experiment, irrespective of how many additional transplants were carried out. Type IV, quiescent or resting LV clones (red arrowhead, Fig. 2A) were defined by (i) not detected in 1° transplants and/or subsequent transplants, but then (ii) detected in one or more recipients in any succeeding transplant. The length of time Type IV then persisted was irrelevant to the definition of Type IV behavior, as long as the clone did not undergo a round of non-detection to surface again, which is defined as Type V or fluctuating clonal behavior (orange arrowhead, Fig. 2A). Type V behaviors were defined in experiments, which were transplanted enough times to observe the following clonal outcomes: (i)

detection in one transplant including the tumor of the recipient that was used for the subsequent round of injections, (ii) below the detection limit in the one or more of the following transplants, including recipients that were further transplanted, and (iii) detection in any successive transplant.

#### Insertion site determination

Lentiviral insertions were detected by splinkerette PCR as previously described (41).

#### Chemotherapy treatment

Transduced and xenografted colon tumor cells were re-injected into mice and when tumors were palpable, mice received intra-peritoneal injections of either vehicle (PBS) or oxaliplatin (Sigma, 5-15 mg/kg) twice a week for 2 to 4 weeks. Mice were sacrificed 2 to 5 days after the last treatment. To assess tumor re-initiation, control and oxaliplatin-treated cells were isolated and equal viable cell doses were re-injected into subsequent recipients, which did not receive any treatment. Viability was determined by Trypan Blue exclusion.

#### Quantitative analysis of Southern blot data

To quantify the blot data, a specific program was implemented in C++. This program simulates the peak shape, recovers and eliminates the background in columns, and fits peak parameters to the experimental data. Southern blots are digitized and columns are selected and reduced to a single vector of values by summation. Peak shape is simulated by assuming an isotropic linear diffusion process of the luminescent protein in the gel from its well. Further, as the images are obtained by manually putting a sensitive film on the gel, some motion blur is assumed. The background is obtained by sub-sampling the initial data and interpolating between sub-sampled points. Then the interpolated points are successively smoothed until the difference between two

adjacent points is no more than a set threshold. The peak parameters are the height and the position. They are fit by exhaustively checking all parameters around a manually input position. Finally, the area under the peak is assumed to be that of the idealized peak which was fit.

### Measuring similarity between tumors

Transplanted tumors are compared to their primary tumor. As a significant fraction of the clones are not successfully transplanted, only those clones present in both the original and the transplanted tumor are considered. The similarity used is the angle between the vectors of the relative proportions of the clones considered in each tumor. The angle between the proportion vectors  $t_1$  and  $t_2$  is calculated as:

$$a = \text{Acos}((t_1 \cdot t_2) / (|t_1| |t_2|))$$

This yields a result between 0 and  $\pi/2$  (as all values in the vectors are positive). The similarity  $s$  is then renormalized to lie between 0 and 1, where 0 represents orthogonal vectors and 1 parallel vectors.

$$s = 1 - a/\pi$$

For the purpose of this comparison, treated and untreated tumors were considered separately. The treated/transplanted comparison compares tumors, which were treated with their untreated transplant.

### Mathematical fitting

The fraction of all clones recorded over each series of transplantation was recorded as a function of the number of transplantation. The median of each transplantation number group was fit with an exponential. This was done to verify the hypothesis that a constant fraction of the clones was lost during each round of transplantation. An excellent fit was obtained with an  $R^2$  of 0.96.

The fit further indicated that only 70% of the total clones present were observed in each blot. This can be explained partly by: a threshold sensitivity effect of the film used to produce the blots: as the films were not pre-flashed, no faint bands below a certain threshold could be observed; and by clones that are below detection limits, but that become activated and expand to become detectable in subsequent xenograft recipients.

### Monte-Carlo Simulation

The similarity study showed that clone multiplication kinetics were not significantly different. Furthermore, assuming exponential growth would have meant very finely tuned parameters to conserve tumor diversity, and thus would not have modeled the experiment robustly. However, significant dispersion was observed in the fraction of clones conserved in the transplanted tumor as a function of the number of observed clones in the tumor to be transplanted. A simple stochastic process was simulated to simulate this. Tumors with various number of clones were virtually transplanted until no clones were observed. The probability of any clone being transplanted was that observed in the mathematical fitting, with a dispersion of +/- 50%. This reproduced the spread of experimental data, showing that no other stochastic process needed to be assumed to reproduce the experimental pattern.

### Statistical analysis

All data was analyzed using GraphPad Prism version 5.0 for Mac OS X (San Diego California USA, [www.graphpad.com](http://www.graphpad.com)). P-values were calculated using Student's two-tailed t-tests.

## Supplementary Text

### Marked CRC cells generate xenografts that maintain the characteristics of the patient tumor

We transduced cells from ten colorectal carcinomas obtained post-resection from a spectrum of primary (n=6) and metastatic (n=4) tumors, including microsatellite stable and unstable samples (Table S1). Following brief transduction using a GFP-expressing lentivirus, cells were injected into the renal capsule of immunocompromised mice. The transduced cells generated xenografts and maintained stable GFP expression over serial transplantation (Fig. S1, S2). The xenografts resembled the primary patient tumor morphologically (Fig. S3) and by expression of proliferation, cell death, and differentiation markers (Fig. S4). Xenografts did not reliably form when injecting CRC cells into orthotopic sites (Table S2). Genomic analysis of viral insertion sites from several experiments did not reveal a preference for integration near known oncogenes or tumor suppressor genes, suggesting that lentiviral insertion did not influence tumor growth (Table S3). These data indicate that brief exposure to lentivirus efficiently transduces and marks primary human CRC cells under conditions that permit their survival while maintaining their malignant properties.

### Clonal outgrowth is maintained through serial rounds of tumor transplantation

To assess clonal dynamics in xenografts, we used high-resolution single nucleotide polymorphism (SNP) microarrays to compare genome-wide DNA copy number profiles of pre-transplant tumor cells and the corresponding xenografts for three biological samples. For each of these samples up to four serial transplants were undertaken, with two to four mice per transplant, encompassing 393 days (CT38), 341 days (CT54), and 261 days (CT59) of total tumor growth. The majority of CNAs detected in patient tumor samples prior to injection were recapitulated in all corresponding primary (1°) xenograft recipients (Figs. 1B, S6, S7). For diagnostic samples CT38

and CT59, an outgrowth of a minor genetic clone had occurred since several novel aberrations, which were below the detection threshold of the SNP arrays in the patient tumor, were detected in multiple corresponding 1° recipients (Table S4, Figs. S6, S7). We did not detect any CNAs in the third patient tumor sample (CT54) and no new CNAs were detected in the tumors of its corresponding 1° recipients (Fig. 1B). The CNA profile of all secondary (2°) xenografts closely matched the CNAs detected in 1° recipients (Fig. 1B). Moreover, the CNA profiles of quaternary (4°) and quinary (5°) xenografts, which have undergone several rounds of expansion, also recapitulated the aberrations detected in 1° and 2° xenografts (Fig. 1B). The presence of multiple xenograft recipients from the same patient sample with both identical and new CNAs strongly supports the existence of subclones that are present at low levels in the diagnostic sample. Thus, CRC clones were stably maintained over time in multiple recipients at multiple transplants as assessed by global DNA copy number analysis.

In addition to CNAs, somatic mutations are important drivers of cancer progression (42) and occur most frequently in restricted mutational hotspots of the genome. To gain insight into the prevalence of known driver mutations over time, the presence of single nucleotide variants (SNVs) in tumor DNA following rounds of xenografting was analyzed using targeted deep sequencing (36). Over 600 cancer hotspot mutations in 88 kb of sequence encompassing the mutational hotspot regions in 54 genes were sequenced to a median coverage depth of 1350X. Paired analysis of SNVs detected in patient tumors and matching normal intestinal mucosa illustrated variation in the total numbers of somatic SNVs between different patient tumor samples (CT38: 1 somatic SNV; CT54: 8 somatic SNVs; CT59: 11 somatic SNVs; Fig. 1C). For all three tumor samples, comparison of SNVs between the patient tumor sample and 1° recipients indicated that all somatic SNVs detected in the patient tumor were also present in 1° recipients (Fig. 1C, Tables S5-7). For CT59, the frequency of nine somatic SNVs was increased in 1° xenografts (SNV frequency ranges: patient

tumor, 9.3%-24.0%; 1° recipients, 33.4-63.1%; Fig. 1C), consistent with enrichment of a clone from the patient tumor sample. Of note, this analysis does not take into account copy number changes, loss of heterozygosity, or cellularity, although we estimate >80% of cells used for sequencing were tumor-derived. Next, the prevalence of somatic SNVs was examined over serial passage by tracking the frequency of each somatic SNV over consecutive transplants. For CT38, the somatically acquired SNV (in an intron of *RET*) was present at similar allele frequencies across patient and xenograft-derived tumors (patient tumor, 61.5%; 1° xenografts, 71.9±4.4%; 2° xenografts, 72.4±4.9%; 4° xenografts: 73.8±4.7%; Fig. 1C, Table S5). For CT54, the variant allele frequencies for four of the eight somatically acquired SNVs (TP53 N156H, CDH1, STK11, FGFR1) decreased from 1° to 2° transplantation, while one SNV (MSH K675X) was enriched in 2° recipients (Fig. 1C). The frequency of all eight somatic SNVs remained stable between the recipients of 2° and 5° transplants (Fig. 1C, Table S6), indicating that xenografting selects a genetic clone that remains stable over consecutive transplants. For CT59, the 11 somatically acquired SNVs (BRAF V600E, APC G487R, FBXW7 R104X, FBXW7 W408C, FLT3 C452X, HRAS A18V, KIT C902C, KRTAP19-6 G20G, PDGFRA P567L, TP53 R283H, and TP53 R196X) were present at comparable frequencies between the recipients of 1° and 2° transplants (Fig. 1C, Table S7), suggesting that xenografting maintains tumor cells that recapitulate a cell population present in the patient tumor sample. Importantly, no new somatic SNVs were detected in xenograft-derived tumors (Fig. 1C), indicating that out of the 660 mutational hotspots analyzed, no xenograft-specific somatic mutations were acquired. Consistent with the CNA data, targeted sequencing reveals that xenografting selects for clones that are stably propagated over multiple recipient mice and serial transplants.

To explore the degree of genetic variability after transplant into xenografts, we also used exome sequencing. The exome sequences of a MSS sample (CT38), its matching normal mucosa,

and two recipients from 1° transplants were analyzed. The average depth of coverage for the eight samples was 278X; 90% of the targeted exons were covered at least 28X (average 37X). A total of 316 somatic SNVs were detected in the diagnostic sample (26 synonymous, 6 stop-gain, and 61 non-synonymous, 223 located outside of exons). Paired analysis demonstrated very high retention of diagnostic SNVs in 1° xenografts with only 24 of the somatically-acquired SNVs enriched up to 4-fold and 12 SNVs decreased (more than 2-fold) or lost in 1° xenografts; congruent SNV profiles were seen when comparing the diagnostic sample to 2° or 4° recipients (Fig. S8A, Table S8). These data indicate that xenografting retains the major genomic aberrations of the diagnostic sample while selecting for a subset of CRC cells that are propagated as xenografts. To determine whether the clones selected in 1° xenografts remained stable over multiple transplants, we compared the somatically acquired SNVs from 1° recipients to 2° and 4° passaged recipients. A high level of genomic similarity was observed in serial xenografts irrespective of passage number (Pearson's  $r=0.944$  and  $r=0.95$ , respectively, Fig. S8B), strongly supporting our prior genomic analyses.

We next sought to determine whether new SNVs could be detected in xenografts. If the same SNV appeared in each of two xenograft recipients, we reasoned that this is highly likely due to the emergence of a preexisting mutation present in the diagnostic sample, but that was below detection limits. Alternately, detection of a SNV in only a *single* recipient is more likely due to a bona fide *de novo* mutation arising through tumor propagation. We found no cases of non-synonymous SNVs that were detected in only one of the two 1° recipients (xenograft 'a' in Fig. S9A). We then looked for non-synonymous SNVs that were enriched (or detected  $\geq 2\%$ ) in this recipient, but below the 2% cutoff in the parallel recipient and diagnostic sample. We found one non-synonymous mutation (APBA1 G178A) that was enriched in one of the two 1° xenografts (1° recipient 'a': 8.1% versus 1° recipient 'b': 1.7%, Table S9) and then detected in all subsequent 2° and 4° xenografts derived from this initial recipient. It is likely that the *APBA1* mutation was below



detection limit at diagnosis but was selected for in xenografts. Paired analysis of 2° xenografts with diagnostic tumors yielded similar results. In this case, 67 non-synonymous SNVs were *enriched* in only one of the two 2° xenografts (Fig. S9 and Table S10). These SNVs were present at low levels (less than 2%) in the diagnostic sample or 1° xenografts, indicating that they likely comprised minor cell fractions in the diagnostic sample. Of note, this analysis does not take into account tumor cellularity, although we estimate >80% of cells used for sequencing were tumor-derived. Collectively, the exome sequence of 1° and 2° recipients is consistent with selection of a pre-existing clone from the diagnostic tumor in the xenograft.

Finally, we examined how the exome of a late passaged xenograft compares to its diagnostic sample and earlier xenografts. Analysis of two recipients from 4° passage revealed enrichment of 235 non-synonymous SNVs in one of the two 4° xenografts, which were either not detected or detected at low levels (less than 2%) in prior xenografts and the diagnostic tumor sample (Fig. S9 and Table S11). Of these, 15 non-synonymous SNVs were only detected in one of the two 4° recipients, suggesting that they are newly acquired SNVs. These newly detected SNVs were present at a frequency of <15% in any recipient and never presented as the predominant tumor clone. In summary, these data are consistent with selection of a CRC clone from the diagnostic tumor sample that survives and contributes to tumor growth over consecutive transplants and, while some new mutations are gained over the course of several transplantations, it largely recapitulates the exome of the diagnostic sample.

As a fourth independent assessment of the stability of xenograft tumor propagation and the relationship between xenograft and primary tumor, we carried out passenger methylation pattern analysis that serves as an epigenetic molecular clock to assess divisional history (40). This approach was applied to determine whether serial xenografting perturbs tumor cell population diversity. Passenger DNA methylation patterns were analyzed at several CpG rich regions (40). For the two

analyzed samples (CT38 and CT54), high levels of methylation pattern diversity were found in the patient tumors that were largely maintained across all passages in their xenografts (Fig. S10), indicating that population diversity was maintained with xenograft age. Together with the findings that tumor phenotype and growth are maintained with each transplant, these genomic data provide strong evidence that the xenograft model allows for sequential propagation of CRC cell clones that are representative of the tumor cell population within primary human CRC tissue.

#### Detailed copy number alteration analysis of CRC tumors through serial xenotransplantation

To determine whether repeated rounds of *in vivo* tumor expansion in xenograft assays select for particular genetic CRC clones, we performed high-resolution genome wide DNA copy number profiling of tumor cells prior to transplant and the corresponding xenografts using single nucleotide polymorphism (SNP) arrays. We analyzed three biological samples and for each we profiled two to four recipients at several *in vivo* passages, encompassing up to 400 days of tumor growth and 24 tumor recipients in total (Fig. 1B). The major genetic copy number aberrations (CNAs) displayed in patient samples prior to injection were recapitulated in the corresponding 1° recipients (Fig. 1B). In sample CT38, loss of a 63-Mb region on chromosome 5 (5p15.2 – 5q13.3) and gain of chromosome 20 were seen both in the patient tumor sample and all three 1° recipients (Fig. S6A,B). Likewise, in sample CT59, both the patient sample and all four 1° recipients harbored losses of a 2-Mb and 4-Mb region on chromosome 1 (1p13.2 – 1p13.1 and 1p13.1 – 1p12), as well as a gain of a 39-Mb region on chromosome 1 (1q32.2 – 1q44) (Fig. S7). We did not detect any CNAs in the third patient sample (CT54) and no new genetic aberrations were detected in the tumors of its corresponding 1° recipients (Fig. 1B). Overall, major CNAs that were detected in the patient samples were recapitulated across all 1° recipients.

Paired CNA analysis revealed several novel aberrations amongst recipients after transplant. For sample CT38, we detected two CNAs, a 31-kb deletion on chromosome 12 (12p13.1) and a 42-Mb deletion spanning chromosome 18 (18q22.3 – 18q12.1), which were detected in all 1° recipients, but were below the detection limit in the patient sample (Fig. S6C,D, Table S4). For sample CT59, we detected eleven CNAs in the 1° xenografts using paired copy number analysis, including 225-kb and 303-kb deletions on chromosome 1 (1p35.1 and 1q31.1, respectively) and a 50-Mb deletion on chromosome 2 (2p25.3 – 2p16.3), which were below the detection limit in the patient sample, but were observed in all four 1° recipients (Fig. S7). 7-Mb, 124-kb, and 568-kb deletions on chromosome 6 (6p25.3, 6p22.3, and 6q24.3, respectively) were detected at low levels in the patient, but further loss was evident across all 1° recipients. In addition, a 1-Mb loss on chromosome 16 (16q22.1) and a 2-Mb loss on chromosome 18 (18q21.31 – 18q21.32) were below the detection limit in the patient sample, but were observed in all four 1° recipients (Fig. S7). Likewise, all 1° xenografts generated by CT59 primary tumor cells contained a 561-kb gain on chromosome 2 (2q33.1), a 70-Mb gain on chromosome 7 (7q21.13 – 7q36.3) and a 5-Mb gain on chromosome 17 (17p13.3), which were below the detection limit in the patient sample (Fig. S7). In the third sample (CT54), we detected no CNAs that were specific to the xenograft. The detection of identical CNAs in multiple xenograft recipient mice indicates outgrowth of a clone from the primary patient sample, rather than *de novo* generation of variants due to xenotransplantation, which would be a random process where each mouse would be different.

Next, we sought to determine whether the clonal outgrowth we detected in 1° xenografts would be propagated upon several rounds of transplantation. In the three samples we tested, the CNA profile of 2° xenografts closely matched the CNAs detected in 1° recipients (Fig. 1B). In sample CT59, a 296-kb gain on chromosome 2 (2p16.3) was dominant in both 2° recipients, but was below the detection limit in the patient sample and 1° recipients (Fig. S7). Comparing the

CNAs of 4° recipients from CT38, which have undergone several rounds of expansion, demonstrated a complete recapitulation of all aberrations detected in 1° and 2° xenografts (Fig. 1B, Fig. S6). Thus, we observed maintenance of genetic clones in our serial xenografts over time. Our data indicate that xenografting CRC specimens allows for expansion of a genetic clone present in the patient tumor.

#### CRC tumor population heterogeneity through serial xenotransplantation

The SNP CNA and LV studies illustrate tumor propagation heterogeneity between individual cells with similar genetic background. However, this propagation heterogeneity may not reflect the tumor cell dynamics in a primary tumor if xenotransplantation selects for subpopulations of tumor cells more adapted to the mouse microenvironment. We used passenger methylation patterns at “epigenetic molecular clocks” (43) to detect potential population bottlenecks caused by xenotransplantation. Previous studies demonstrated that passenger methylation patterns become homogeneous after single cell cloning and xenotransplantation (40), indicating the ability to detect severe population bottlenecks. Passenger methylation patterns were analyzed at multiple loci (8 to 14 CpG sites per locus). Polymorphic SNPs were used to distinguish between maternal and paternal patterns for the autosomal loci ABHD8 and ZNF471, and the X-chromosome BRS locus in the female patient with CT54.

To allow comparisons between the primary tumor and its xenografts, multiple small 1-2 mm<sup>2</sup> tumor regions were microdissected from stained microscopic sections (1 to 6 regions per tumor) using laser capture microscopy. Methylation patterns were read with bisulfite sequencing of clone PCR products. Heterogeneity within these small tumor areas is measured by sampling between 6 to 8 epialleles per microdissected region and then counting the numbers of unique

patterns or tags and calculating the pairwise distance (PWD) between the tags. Greater heterogeneity is indicated by more unique tags and greater PWDs.

Tumor heterogeneity appeared to be maintained after xenotransplantation because methylation pattern diversity was not consistently different between the primary cancers (CT38 and CT54) and their xenografts (Fig. S10). There was a trend for increased diversity in the xenografts compared to their primary tumors, with significantly higher xenograft PWDs and unique tags for the BRS locus for CT54, and significantly higher xenograft PWDs for the LOC locus for CT38 (two-tail t-test,  $p < 0.05$ ). Diversity in the first xenografts after transplantation was not significantly different from their primary tumors except at one locus (ABH for CT38). Overall the passenger methylation pattern analysis provides evidence that the population diversity in the primary tumors is maintained or increases after xenotransplantation.

Passenger methylation pattern diversity can also measure potential reductions in tumor cell population diversity caused by chemotherapy. The CT38 oxaliplatin treated xenografts had lower PWDs (0.97 versus 1.25) and significantly lower unique tags (2.4 versus 3.1) compared to their same aged untreated xenografts. No differences in diversity were observed for untreated and oxaliplatin treated CT54 xenografts (Fig. S10). These findings are consistent with little or minor reductions in tumor cell diversity and the lack of a severe population bottleneck induced by oxaliplatin treatment, consistent with the no apparent change in the absolute number of LV marked clones in the oxaliplatin treated xenografts.

#### Reproducible patterns of CRC cell outcomes

To obtain a measure of the clonal distribution over time, the proportion of each LV clone type was determined for every xenograft by normalizing for differential inter-sample marking efficiency and averaging between all recipients at a given passage (Fig. 2D). Type I, Type II, and

Type III behaviors were seen in 7, 8, and 9 of 10 samples, respectively; 4 of 10 samples had all three types. Type IV and Type V clones with variable proliferative activity appeared in early as well as late passages and were detected in 8 and 4 samples, respectively. Importantly, all samples contained functionally distinct cells. In some cases, our classification is limited by experimental design (Fig. 2C). For example, sample CT19 was transplanted only twice due to long latency (546 days, Fig. 1A) precluding the ability to define Type II and Type V behavior, which requires a minimum of three passages. Likewise, the long-term Type I behaviors classified in 2° xenografts for sample CT19 may not persist through as many transplants as Type I clones in CT54, which were evident in six consecutive transplants. Despite the reduced number of overall passages for some samples, the total time of lineage tracking was invariably more than 250 days. Of note, transplanting LV clones, which were previously minor, into multiple parallel recipients and finding them to dominate across all mice (Fig. S11), supports the notion that this behavior is stable and not random. Collectively, each LV clone type was identified in four or more patient samples, establishing that the varied clonal behaviors are reproducibly found in primary CRC.

We determined the cumulative numbers of each LV clonal behavior across all experiments. Type I, II, III, and IV clones each accounted for ~22% of marked clones, while Type V intermittently proliferating clones were the least frequently observed (12%) (Fig. 2B). These findings indicate that colorectal tumors contain a heterogeneous pool of functionally distinct CRC cells that vary in their longevity and proliferative kinetics despite sharing similar genomic profiles.

### Patterns of clonal growth

Variation in clonal behaviors could be stochastic or they could reflect specific classes of CRC cells that function in a predictable deterministic fashion. If the process is stochastic then the probability of any LV clone contributing at any transplant will be reflected in its relative

distribution in the previous donor tumor; abundant LV clones have a higher probability of persisting than less abundant clones. By contrast, the emergence of dominant LV clones from minor or undetected LV clones would be a low probability event, especially simultaneously within multiple recipients at a given transplant. Examination of clonal output as measured in parallel recipients at each passage did not support the stochastic model. For example, a Type I clone that dominated tumor growth in later transplants of sample CT54 (upper arrowhead, Fig. S11A) was not abundant in each of the 1°, 2° or 3° recipients that were selected for further transplantation (upper arrowheads, Fig. S11A). Indeed, the 3° xenograft is dominated by a different clone (lower arrowhead, Fig. S11A). However, upon further passage, the dominant 3° clone is strikingly surpassed by the apparently activated Type I clone (upper arrowhead) in all four 4° recipients, which then continues to dominate tumor growth in all 5° and 6° recipients. Whereas random growth dynamics would predict clonal dilution of minor marked clones over multiple transplants, the observed clone is in relatively low abundance over 3 rounds of transplantation and then, despite being a minority of injected cells, dominates all four 4° and subsequent recipients. Sample CT51 also showed unexpected distribution of LV clones upon transplantation. The 1° transplant contains several dominant LV clones (depicted by the upper arrowhead, Fig. S11B) and a minor LV clone (lower arrowhead, Fig. S11B). Upon re-transplantation into three 2° recipients only the previously minor marked clone dominated, rather than the clones that were dominant in 1° transplant (lower arrowhead, Fig. S11B). Taken together, this data is consistent with the notion that LV clones can behave in a predictable fashion.

#### Mathematical modeling of the clonal patterns

All the Southern blots were digitized and the relative size of the clonal populations that had been previously identified was quantified using image analysis. These relative sizes were tracked

through serial xenografts. Relative clonal population size represents a surrogate measure for clonal proliferation. Because only a fraction of the tumor is injected at every transplant, some LV clones may be lost due to dilution. To investigate this possibility we determined the fraction of observed LV clones in every consecutive transplant over the total number of marked LV clones in the experiment. The median was used as the estimator of the main parameter of the distribution. An excellent fit ( $R^2=0.96$ ) was obtained when fitting the median at each transplant to an exponential curve (Fig. S12A). The exponential decline in the number of LV clones indicates that transplantation is a dominant factor in the disappearance of LV clones. Moreover, this analysis also indicated that the sensitivity of the Southern to detect clones was approximately 70% (that is, undetectable clones that appeared in subsequent xenografts). There is significant spread of data around the medians in Fig. S12A. We implemented a Monte-Carlo model to determine whether any other factors influencing clonal loss are contributing to this dispersion and to resolve whether the exponential decline can be predicted solely on the basis of two stochastic effects: (i) the loss of LV clones due to the transplantation process and (ii) the sensitivity of detection of a Southern blot. The simulation shows that as the initial number of observed LV clones goes up, a smaller dispersion is seen (Fig. S12B). The symmetry of the dispersion as well as the good reproduction of the experimental spread by the model indicates that the two stochastic processes in the model suffice to explain the observations and do not require any further assumptions to be imposed on clonal function itself. Since the Monte-Carlo model simulates the contribution of the two stochastic processes and reproduces the observations of clonal loss, any further significant stochastic influences on the clonal size/proliferation is not justified to reproduce observed data. As this is the simplest model that reproduces the data, it is also the most likely to be true. Thus, clonal loss is not due to the imposition of stochastic processes on clonal function/proliferation, which remains stable, but rather on randomness due to the transplantation process. With the knowledge that



transplantation contributes to clonal loss, to examine clonal dynamics (constant or newly emerging) and variation in clonal population size, we performed comparisons on matching sets of clones that were present in any two sequential tumor samples (e.g. 1° to 2°; 2° to 3°; 3° to 4°; etc). In tumors where no emergent LV clones (Type IV or V) are observed, the relative clonal population size of LV clones, which have been successfully transplanted, is very similar in paired samples (Fig. S12C “No Emergent”). On the contrary, we found that the presence of emergent LV clones correlates to significant variation in the LV clone proportions (Fig. S12C “Emergent”). Thus, activation of previously dormant LV clones corresponds to tumor-wide changes. Oxaliplatin treatment of the tumor also leads to large changes in LV clone proportions. Quantitative analysis of re-transplanted cells showed preservation of the tumor structure after oxaliplatin treatment (Fig. S12C “Untreated”, “Treated” and “Treat/Trans”). The tumors derived from treated samples where emergent Type IV clones are selected show even higher levels of similarity. Indeed, these post-oxaliplatin treatment tumors are generally smaller (Fig. 3A) than controls supporting the notion that Type IV derived tumors may be distinct.

Collectively, this modeling and data quantification predicts that at least some of the clonal loss that distinguishes between Types I, II, and III clones may be due to stochastic processes involving the transplantation process and the sensitivity of detection. Clonal proliferation seems to be relatively constant and not influenced by stochastic processes. Nevertheless, the data suggests that active clones are distinct from the dormant LV clones (Type IV or V). Thus, the interpretation that the five experimental categories that depict our results actually represent five distinct classes remains uncertain. However, the data and the modeling clearly support the conclusion that there are at least two functionally distinct classes (constant and dormant/emergent). Moreover, oxaliplatin treatment differentially affects LV clones and thereby alters the tumor structure. We would like to raise a few final thoughts on interpreting the modeling of clonal behavior. When the first lineage

tracing studies were performed on murine repopulating hematopoietic stem cells by us and other groups in 1985, very similar data was obtained showing long-term and short-term repopulating cells (44-46). If the same modeling had been applied, it would have predicted that the repopulating pool was relatively uniform and the differences in short-term and long-term may be due to stochastic processes. However, in the last 5 to 8 years a series of new cell surface markers were developed that enabled prospective isolation of each class thereby proving the existence of distinct classes of long-term and short-term hematopoietic stem cells. Stochastic models of stem cell function cannot be proven, but only disproven (47, 48). Thus, we are cautious about extrapolating too much functional meaning to the modeling at this stage, especially as very limited cell surface markers are available to purify initiating cells from colon or any other solid tumor.

#### Absence of major genetic changes between untreated and oxaliplatin treated tumors

To determine whether the altered clonal patterns after oxaliplatin treatment were due to major changes in genetic subclones, DNA of xenografts from control and oxaliplatin treated groups was profiled by genome-wide CNA analysis. New DNA copy number changes were not detected in the oxaliplatin-treated tumors as compared to control tumors and the CNAs between the two groups were congruent (Fig. 3F, Fig. S6). In addition, SNVs was analyzed following oxaliplatin treatment through targeted deep sequencing. For CT38, the frequency of the somatically acquired SNV in *RET* remained stable following oxaliplatin treatment (Ctrl: 73.8±4.7%; OX: 75.1±2.4; Fig. 3G, Table S5). Likewise, for CT54, the eight somatically acquired SNVs were present at similar allele frequencies across control and oxaliplatin-derived tumors (Fig. 3G, Table S6), indicating that oxaliplatin treatment did not select for a distinct genetic subclone. Importantly, out of the 660 analyzed SNVs, no new SNVs were acquired in the oxaliplatin-treated tumors. In keeping with this similar genetic profile, passenger DNA methylation pattern analysis indicated that tumor cell

population diversity was maintained between untreated and oxaliplatin treated tumors (Fig. S10). The absence of a detectable bottleneck or selection for novel genetic clones after chemotherapy treatment provides strong support for the existence of intrinsic mechanisms, within a genetic lineage, that link variable clonal growth kinetics and tumor propagation behavior with therapeutic tolerance.

#### Caveats associated with the xenograft tumor environment

Xenografting human cells in immunodeficient mice can introduce selection pressures due to the lack of features of the human tumor microenvironment. In some cases, aspects of the microenvironment are provided by implantation into an orthotopic site, while in other tumor models features of the microenvironment are provided by using non-dissociated tumor fragments. The published literature for CRC mainly cites orthotopic models that are either developed using (i) whole pieces of CRC tissue, which are not dissociated into single cell suspensions, but are sutured to the cecal wall, or (ii) injection of cell suspensions from commercially available CRC cell lines but not primary CRC into the cecal wall or other sites including subcutaneous. However, to our knowledge, reports where orthotopic engraftment with single dissociated primary CRC cells is reliably achieved are rare. In our total experience, we have transplanted 143 primary and metastatic tumors that represent the entire spectrum of CRC subtypes under the renal capsule; 130 of these samples yielded tumors. Thus, our overall success rate is 91% for the renal capsule method. In our early development of this model we attempted to transplant liver metastases into the liver of immune deficient mice and primary CRC into the cecum (Table S2). Although sporadic cases would initiate tumors from orthotopic sites, none of these orthotopic sites yielded the highly robust success rate of the renal capsule. Thus, the renal capsule is the only single cell derived model that permits the experimental design our study requires. While no xenograft method is perfect, the renal

capsule xenograft model is arguably the most accurate reflection of human CRC that can be achieved to date in an experimental setting.

The design of our study resulted in a degree of selection. For example, the whole tumor that is resected from a patient is not taken entirely for xenografting, but rather a small piece is used for xenografting. Likewise, some cells are lost during dissociation and transduction and the xenograft environment will also exert pressures on the cells. Our CNA analysis revealed small changes between the primary sample and the first set of xenografts in some samples. However each of the subsequent rounds of xenografts are each highly similar to the primary xenograft. The key message of our manuscript is that there is significant variation in the tumor repopulation function of individual CRC cells within a single sample as detected across multiple xenografts. This large-scale functional variation is not due to large-scale changes in CNAs and mutational hotspots as assessed by targeted sequencing. The passenger methylation analysis further supports this finding. Thus, the potential presence of selective forces that permit the outgrowth of only some of the genetically diverse subclones that must be present in the donor sample (because multiple primary xenografts all have the same clone) does not alter the main conclusion of our work that comes from comparing the xenografts to each other, where the genomic data indicates strong concordance.

#### Selection pressures during xenograft formation

There is a widely accepted dogma in cancer research that clonal dynamics, and ultimately tumor evolution and response to therapy, are driven by the acquisition of new mutations. Our work points to an additional layer of complexity that needs to be considered. We find that within a population of CRC cells, the individual tumor cells exhibit highly variable functional repopulation properties. There are two interpretations of this result: each of the different LV clonal behaviors is due to the outgrowth of specific and unique genetic subclones; or these highly variable functional

properties that are observed across serial xenografts occur without major changes in the genetic identity. Three independent methods applied to the serial xenografts came to the same conclusion that genetic clones remained stable over serial transplantation. Our interpretation of this result is that the functional differences are not linked to known subclonal genetic properties. This conclusion is not dependent on whether the first set of xenografts is genomically identical to the donor sample or whether there are differences reflective of the outgrowth of subclones. The outgrowth of only a subset of the clones that are present in the donor sample could be due to sampling bottlenecks: only a small portion of the tumor is given to us following surgical resection from the patient, tumor cell dissociation and lentivector transduction might lead to some cell loss, and the xenografting process may exert selective forces. We know the outgrowth in the first xenograft must represent an outgrowth of a genetic subclone present in the donor sample rather than a stochastic tumor progression event because multiple recipients all contain the same subclone. Thus, our main conclusion of non-genetically driven functional variation is valid for those genetically diverse subclones that are present in the donor sample. We are careful in universalizing our conclusions as we cannot conclude it will be true for every subclone present nor for those subclones that were not or could not be xenografted.

In addition, our data is strongly indicative of the existence of genetically diverse subclones in human CRC. CNA analysis of diagnostic samples compared to 1° xenografts showed that the majority of CNAs detected in the diagnostic sample prior to injection were recapitulated in all corresponding 1° recipients. For CT38 and CT59 an outgrowth of a minor genetic clone had occurred since several novel aberrations, which were below the detection threshold of the SNP arrays in the patient tumor, were detected in multiple corresponding 1° recipients. It is generally accepted that tumors comprise multiple genetic clones and we selected one genetic lineage in the xenograft that was faithfully recapitulated across all subsequent passages. This result is confirmed

in the genomic analysis of single cell derived populations shown in [Fig. S14](#). This was an important finding as it strengthened our conclusion that the functionally distinct LV clones were all part of one genetic lineage once the xenograft was established.

An alternative explanation for the presence of CNAs in 1° xenografts, which were not detected in the matching diagnostic sample, is that they were below the detection limit in the diagnostic sample because of contaminating non-tumor cells. A piece of flash-frozen tissue from the diagnostic tumor was used to extract DNA for CNA analysis, which could have included a mixture of stromal cells, normal epithelial cells, and/or blood cells. However, only tumor cells generate xenografts and this may have been captured by the CNA analysis, where a higher percentage of tumor cells in the xenograft would have enabled detection of CNAs that were previously masked in the diagnostic sample. We find this across several CNAs where the CNA  $\log_2$  ratio segment intensity increases across 1° xenografts as compared to the diagnostic sample. This can serve as an alternate explanation for the detection of several CNAs in 1° recipients that were not detected in the diagnostic sample.

Even though tumor sampling or the xenografting process can exert selective pressures during initial xenograft growth leading to the outgrowth of subclones, we believe that the xenografted tumor is still relevant and important. Several reports support the relevance of clones growing out in xenografts, supporting the validity of using xenografts to study human cancer and supporting the interpretations of our results, namely that for some patient samples clones from the primary tumor, which was below the detection limit of CNA analysis, were captured in the xenografts. Thus, we conclude that the genetic clone that grows out in the 1° xenografts is a subclone from the patient tumor at the time of resection and, importantly, the clone is stable upon further passages. This enabled us to identify functional heterogeneity within genetically similar lineages.

The limited sampling of the primary tumor and subsequent xenografting discussed above will generate a population bottleneck. Such restriction will result in more limited diversity of the subsequent rounds of population expansion as occurs during serial xenografting. This principle fits well with our experimental results showing overall stability of the genetic clones within serial xenografts. Moreover, the diversity as measured by divisional history through passenger DNA methylation patterns at several CpG rich regions within the processed and transduced donor sample (a limited sampling of the entire tumor) was largely retained between xenografts. While this method may not be sensitive enough to detect all selective pressures that the xenograft environment exerts, it certainly has the capacity to detect severe bottlenecks due to clonal dominance by single cells. It has been reported that xenografts initiated by a single cell have significantly less methylation pattern diversity than xenografts initiated by many cells from the same cell line (40, 43). In our system, we do not find evidence for such a severe bottleneck during initial xenografting or subsequent transplantation, supporting the stability of the xenograft model. This is an important consideration because during clonal evolution, it is expected that a single cell that has gained a selective advantage would outgrow other cells and dominate the tumor and we should be able to detect such a clonal evolution event with the methylation pattern analysis. We do not find changes in methylation pattern diversity during xenograft initiation and over serial xenografts. Thus, the marked functional variation in repopulation was not linked to a severe population bottleneck during xenografting which might have occurred if, for instance, one genetic driver mutation is responsible for a long term Type I clone but not for any other LV clonal behavior.

### Stability of the xenografts

Individual CRC cells from MSI-H tumors are genetically unstable and likely continue to accumulate mutations during xenografting. However, novel mutations in one cell within a tumor

cannot be easily detected unless the cell clonally expands to produce many progeny that carry the new mutation. The lack of detectable genomic changes we observe over time does not necessarily imply that instability does not exist. Rather, the three methods we used including population analysis using passenger DNA methylation analysis imply that no new genomic changes are detected because there is no strong selection for cells with mutations that drive clonal dominance. It is intriguing that we see functional variability in LV clones, but do not see associated changes in known driver gene mutations, indicating that cells exhibit functional diversity that is not necessarily driven by genetic diversity.

The most difficult issue in the study of MSI-H tumors is whether the mutations are neutral or background mutations, which do not influence the function of LV clones that we measured over serial transplants or whether they are significantly influencing growth of LV clones. Because MSI-H tumors have a high basal level of mutation rates, there is increased probability that with every cell division the newly acquired mutation will result in a new cell that has changed growth dynamics. However, until the genome of each new cell is sequenced it is difficult to draw conclusions about whether the mutations that MSI-H tumors have accumulated are affecting cellular behavior, including growth of LV marked clones. Even if the entire genome were sequenced, it would be difficult to have confidence in separating passenger versus driver mutations. Other parameters need to be assessed, such as histology and growth rates. We found that MSI-H tumors recapitulate the histological appearance of the parent tumor over several serial transplantations and do not exhibit increased aggressiveness in terms of time to tumor formation, or show any other alterations in growth that we could detect. We chose to sequence validated mutations, which have been previously implicated to influence tumor progression across a spectrum of human cancers, through targeted deep sequencing (~1300x) in order to directly gain insight into mutations that have known associations with affecting cell growth. This method allowed us to



examine the relevance of a mutation that occurred in a tumor and enabled us to pick up low-level mutations in many known oncogenes and tumor suppressor genes. However, out of 600 analyzed mutational hotspots (in 71 kb, containing 5,271 known single nucleotide variants (36)), we see little evidence that MSI-H tumors have accumulated mutations in driver genes over serial xenografting. In addition, sequencing driver mutations in tumors derived by two different single-cell derived LV clones from a MSI-H tumor (Fig. S14) supports the conclusion that the functional differences in LV clonal behaviors are not driven by these specific underlying driver mutations. Although we have sequenced the exomes of CT38 and its corresponding xenografts, our analysis does not include whole genome sequencing, leaving open the possibility that an unknown DNA mutation could explain the diverse clonal behavior. However, our population studies do not support the existence of such a bottleneck. Thus, while MSI-H tumors are genetically unstable, this instability does not necessarily translate to changes in important driver genes, which we have confirmed through targeted deep sequencing, showing that a large collection of frequently mutated genes were not changed.

### Cancer-initiating cells in CRC

CRC harbors cancer stem cells, which are detected using xenotransplantation assays and are operationally termed cancer-initiating cells (C-ICs) to denote their functional definition. To date eight independent scientific groups have prospectively purified C-ICs in over 90 different CRC specimens (49-55). Although no universal cell markers have been identified to enrich for C-ICs across all samples, combinations of markers applied to individual samples demonstrate that most colorectal tumors are organized hierarchically, with C-ICs driving tumor growth. C-ICs are characterized by their unique ability to self-renew as measured by serial tumor initiation assays. Thus, sequential rounds of xenotransplantation effectively record the output of C-ICs when

performed clonally using limiting dilution assays, even when tumor cells are injected without prior phenotypic fractionation of C-ICs. This *in vivo* experimental model then serves as a tool to measure the defining qualities of C-ICs. Since we used serial xenograft transplantation in our assays to follow the output of single marked CRC cells, we essentially assayed the key properties attributed to C-ICs. Therefore, our experimental data reveals that C-ICs in primary human CRC are not functionally homogeneous. However, we remain cautious in extrapolating our claims to the existence of discrete functional C-IC classes within a C-IC compartment, since CSC cell surface marker expression is variable amongst individual samples (56), and no methods are known that would prospectively purify such putative C-IC classes at this time. Future studies need to focus on markers and mechanisms to determine the basis of CRC cell heterogeneity.

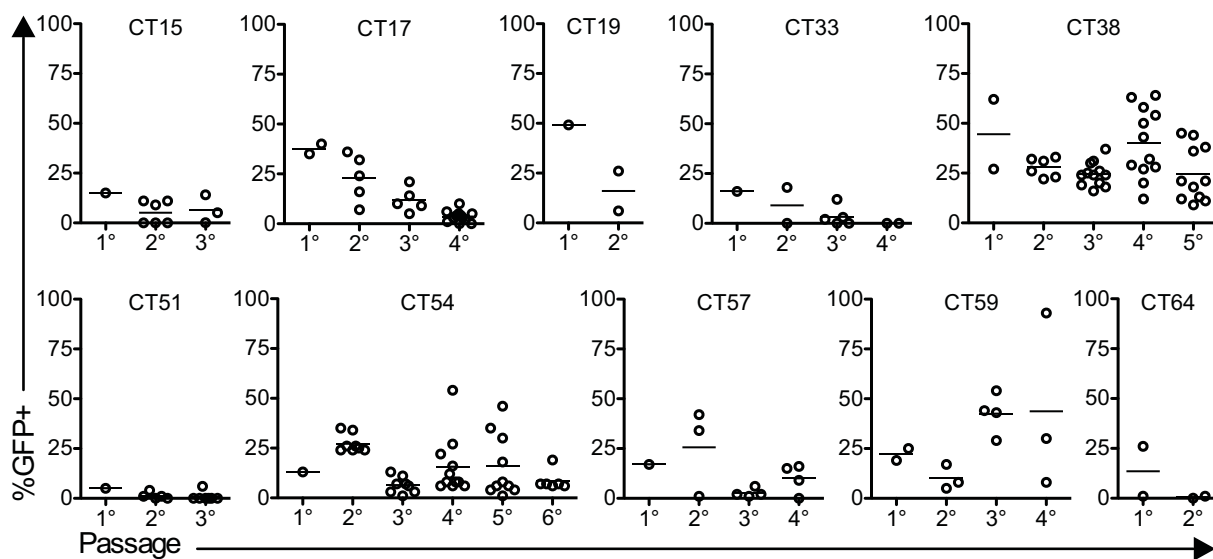

**Fig. S1. Transduced CRC cells generate xenografts that maintain GFP expression.**

Diagnostic tumor samples were transduced with a lentiviral vector encoding GFP and  $5 \times 10^4$  to  $2 \times 10^5$  viable cells were transplanted into immunodeficient mice. Once tumors formed ( $1^\circ$ ), an equal number of cells were transplanted into the next passage. Marked cells were assessed by flow cytometry for GFP expression. Each circle represents the percentage of GFP-expressing tumor cells from one recipient and horizontal lines indicate median GFP expression.

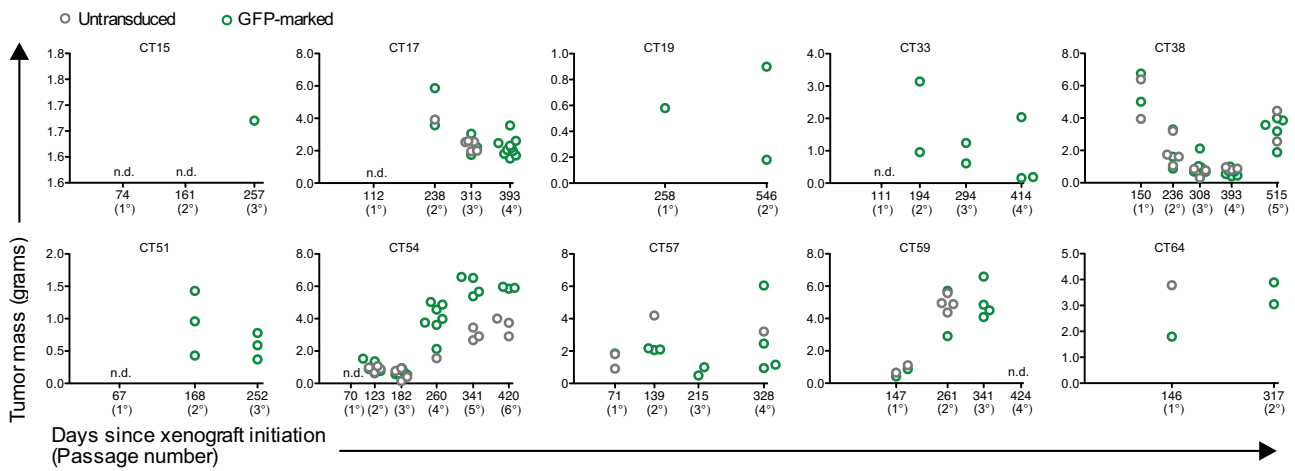

**Fig. S2. Comparison of tumor weights generated by transduced and untransduced CRC cells.**

Following primary tumor tissue dissociation and single cell suspension generation, cells were either (i) directly injected into immunodeficient mice without exposure to lentivirus (grey circles) or (ii) marked with a lentivirus and then injected to generate tumors (green circles). When animals reached endpoint, or a tumor mass was readily palpable in the renal capsule, mice were sacrificed, the tumor removed and weighed to generate the tumor mass measurements on the y-axis. Transduced and untransduced tumors were serially transplanted in parallel as indicated on the x-axis.

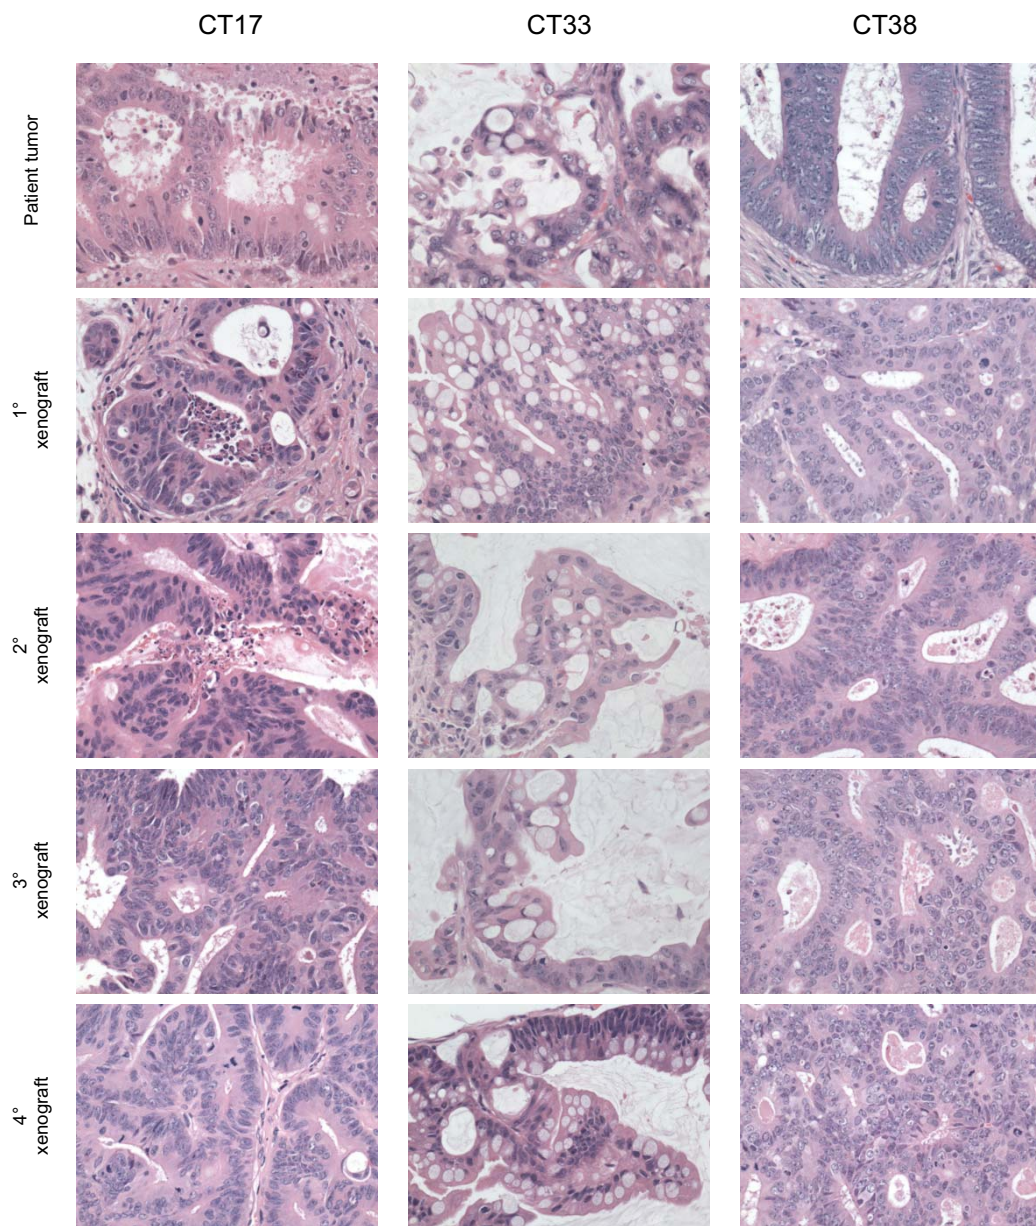

**Fig. S3. Morphology of xenografted tumors and corresponding patient tumor samples.**

Representative haematoxylin and eosin images of samples CT17, CT33, and CT38. For each image, at least 3 slides were analyzed for each tumor and generally 2-4 tumors were stained for the H&E analysis.

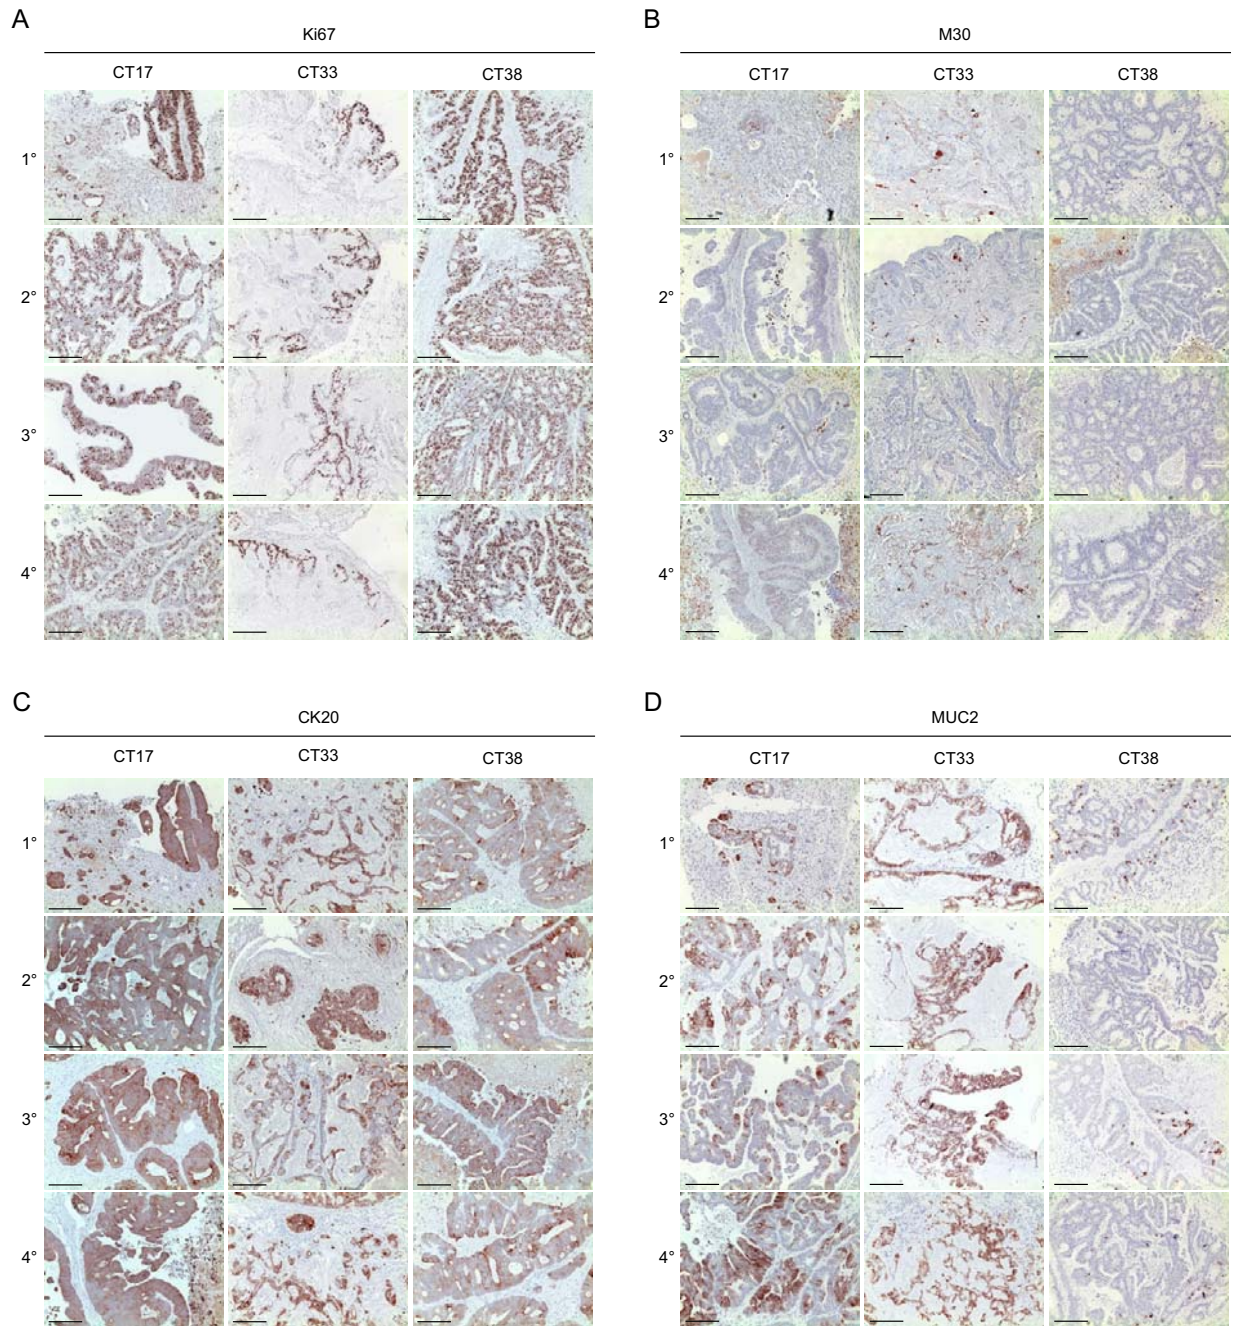

**Fig. S4. Marker expression of xenografted tumors.**

Representative images show expression of proliferation marker Ki67 (A), epithelial-specific cell death marker M30 (B), and differentiation markers CK20 (C) and MUC2 (D). Scale bar indicates 200  $\mu$ m. For each image, at least 3 slides were analyzed for each tumor and generally 2-4 tumors were stained for each analysis.

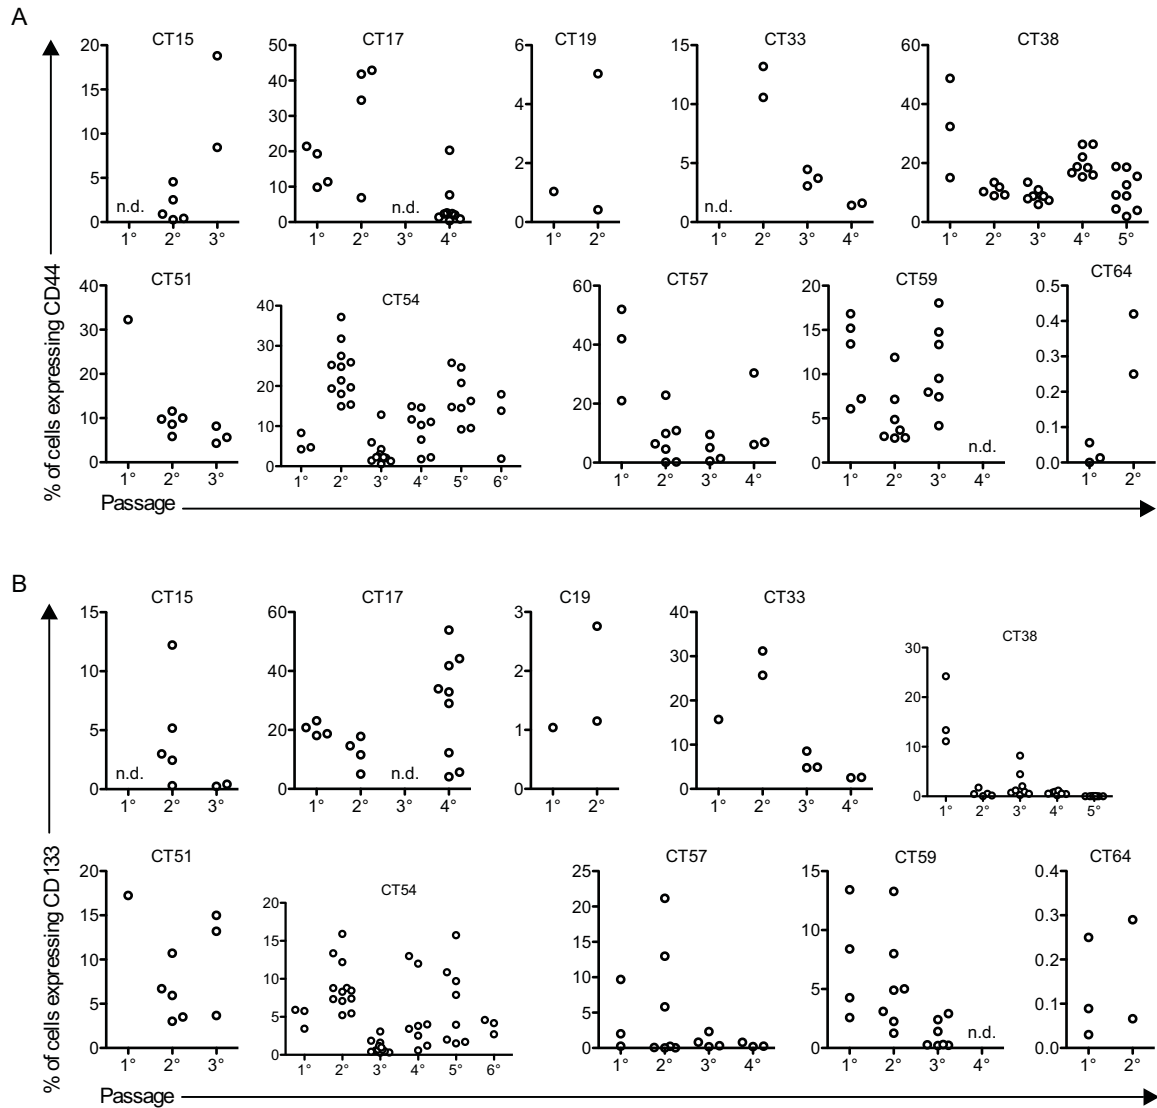

**Fig. S5. CD44 and CD133 expression in xenografted tumors.**

Following single cell suspension generation, cells were stained with antibodies to CD44 and CD133 and marker expression was analyzed using flow cytometry. Each circle represents data of one tumor that was generated by injecting CRC cells into parallel recipients.

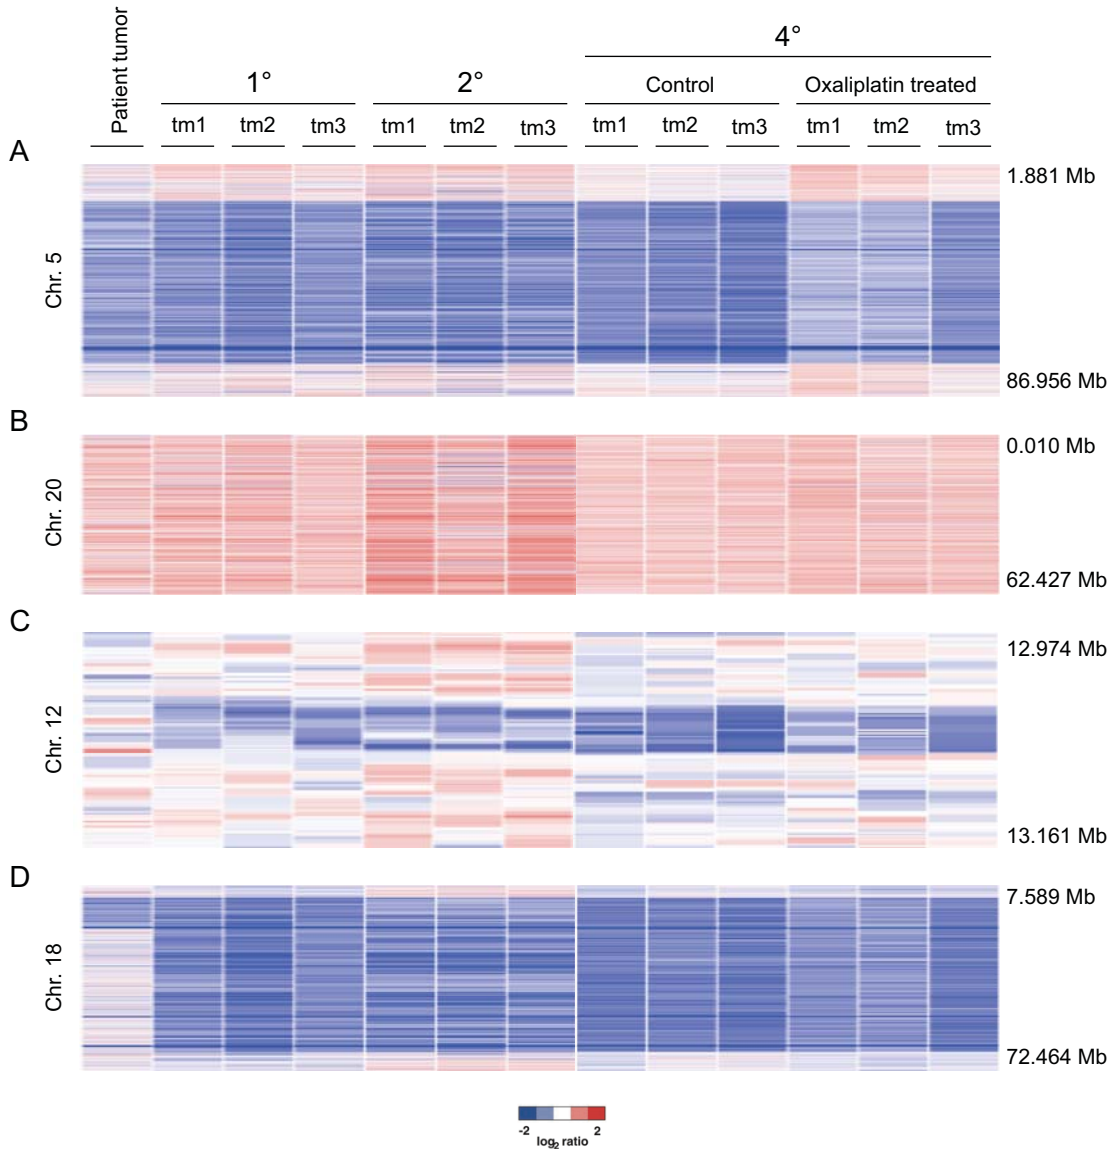

**Fig. S6. Paired copy number alteration analysis in colon cancer sample CT38 and the matching xenografts.**

Copy number heat maps showing gains and losses in the patient sample and the corresponding 1°, 2°, and 4° (both control and previously oxaliplatin treated) xenografts. Log<sub>2</sub> ratio copy number data is shown (median smoothing format; blue, deletion; white, normal; red, gain). Each lane contains the data for one tumor. Data is not normalized for copy number changes and tumor cellularity, although generally >80% of cells are estimated to be tumor cells.



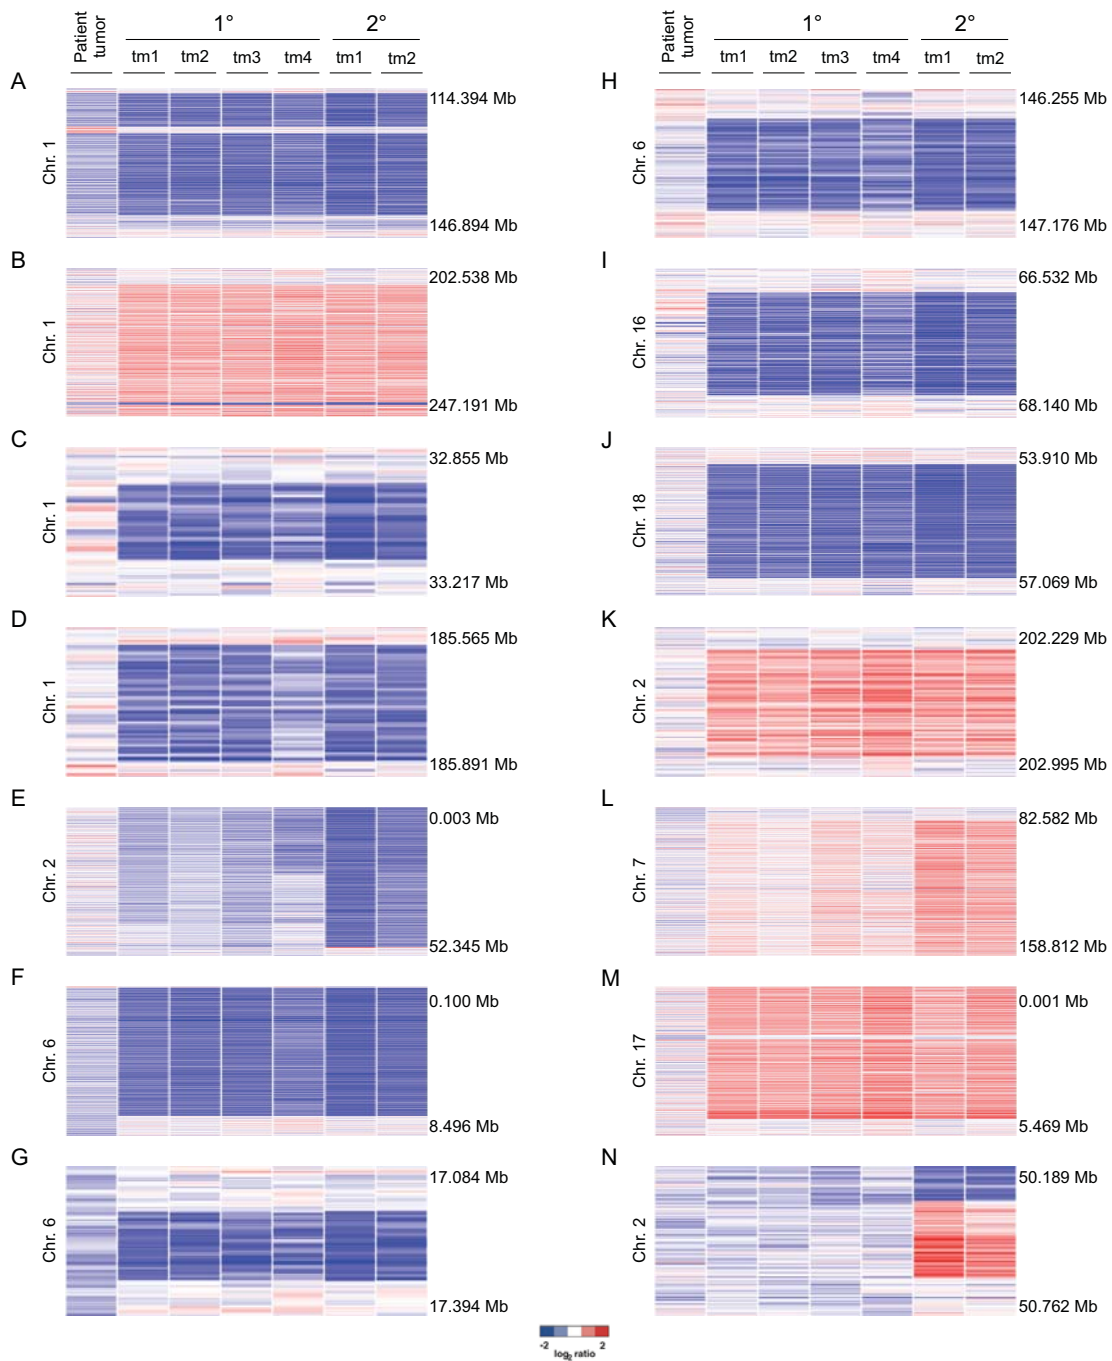

**Fig. S7. Paired CNA analysis in colon cancer sample CT59 and the matching xenografts.**

Copy number heat maps showing gains and losses in the patient sample and the corresponding 1° and 2° xenografts. Log<sub>2</sub> ratio copy number data is shown (median smoothing format; blue, deletion; white, normal; red, gain). Each lane contains the data for one tumor. Data is not normalized for copy number changes and tumor cellularity, although generally >80% of cells are estimated to be tumor cells.

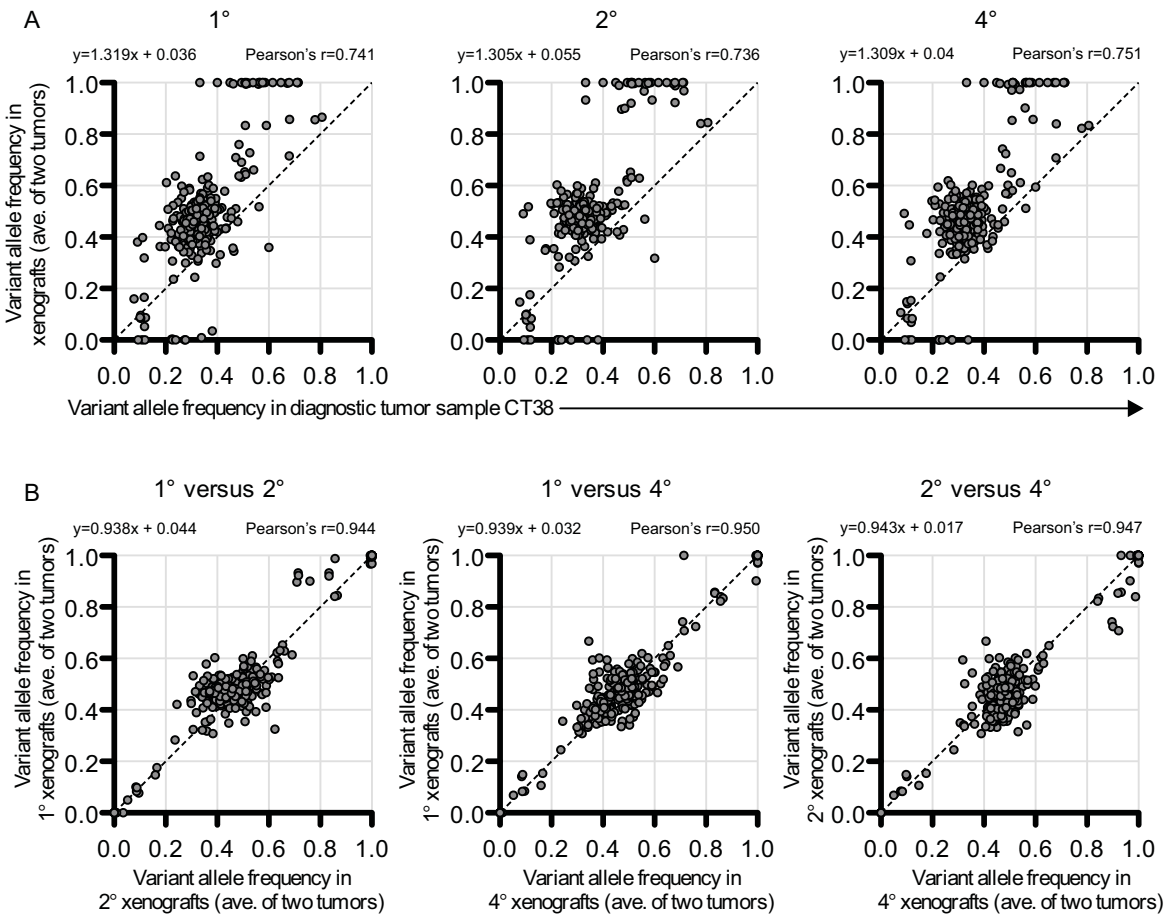

**Fig. S8. Exome sequencing of CT38 diagnostic sample and matching xenografts.**

Tumor cells from diagnostic sample CT38 were transplanted into two 1° recipient mice. A tumor from one of these recipient mice was used for further transplantation into two 2° recipients. This process was repeated up to 4° transplantation. DNA from diagnostic tumor sample, its matching mucosa, and two xenografts from 1°, 2°, and 4° passages was profiled using exome sequencing to an average depth of 278X. (A) Somatic SNV frequencies are shown for the diagnostic sample (x-axis) and xenografts (y-axis). The SNV frequency for each passage is the average SNV frequency between the two sequenced tumors of a particular transplant. (B) Somatic SNV frequencies as determined by comparing the average SNV frequency of 1° to 2° xenografts, 1 to 4° xenografts, and 2° to 4° xenografts. The SNV frequency for each transplant was generated by averaging the frequency of two recipients for each particular transplant.

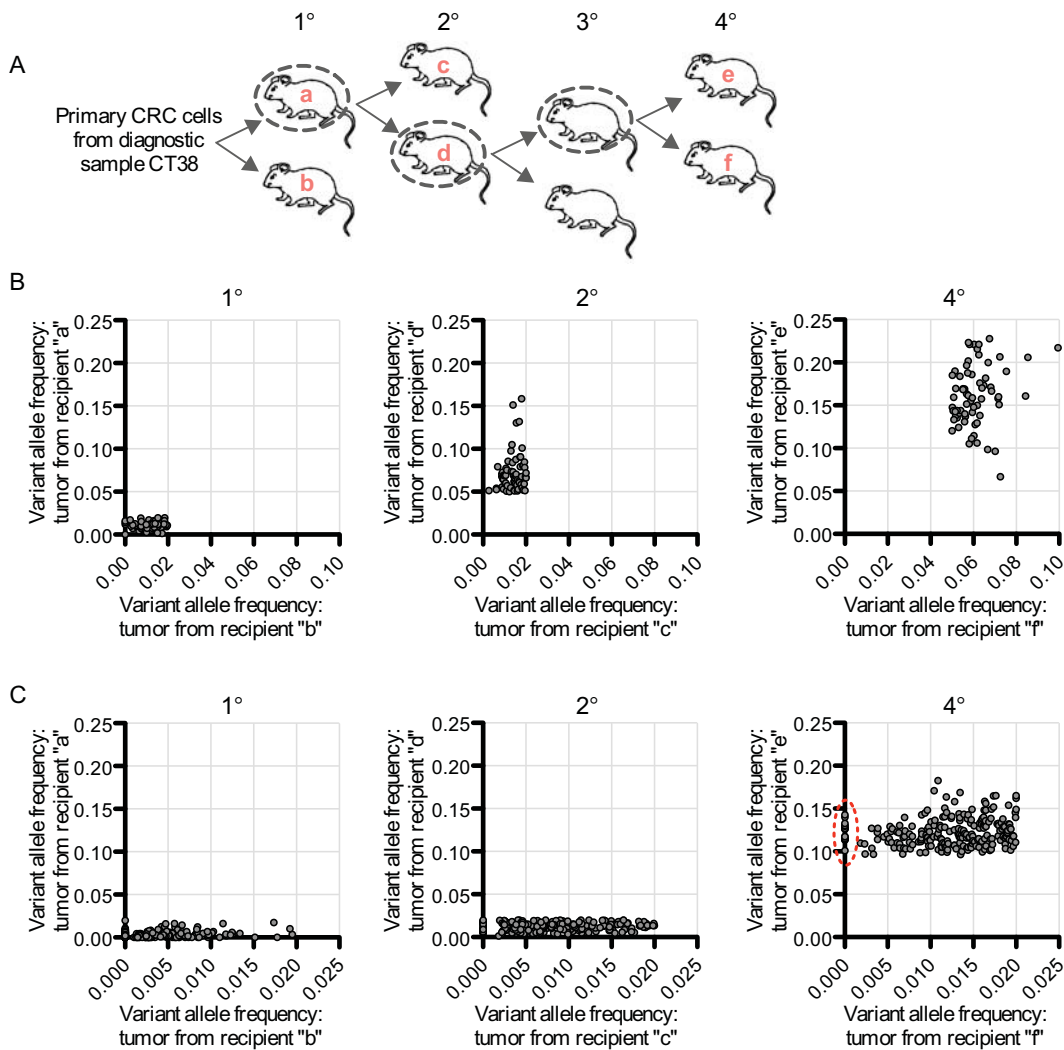

**Fig. S9. Non-synonymous SNVs that are enriched in 2° and 4° recipients.**

(A) Tumor cells from diagnostic sample CT38 were transplanted into two 1° recipients (recipient ‘a’ and ‘b’). Once tumors formed, cells from one of the tumors were re-transplanted into two 2° recipients (recipient ‘a’ was re-injected into recipients ‘c’ and ‘d’). This process was repeated for each subsequent transplant. The recipient whose tumor was used for transplantation is circled. For each transplant, tumor DNA from both recipients was analyzed by exome sequencing. To discover xenograft-specific non-synonymous SNVs, non-synonymous SNVs that were enriched or detected in only one of the two tumors from parallel recipients were considered. These SNVs were detected above 2% in the tumor that was used for further transplantation and were detected in subsequent

recipients, but were detected at a frequency of less than 2% in the other tumor that was not injected further at the same passage. The frequency of these 'enriched' SNVs was then noted across all transplants. **(B)** Non-synonymous SNVs that were enriched in recipient 'd' of 2° transplant as compared to recipient 'c' of the same passage (shown in middle graph, titled '2°'). The frequency of these SNVs was then tracked in 1° and 4° passages. **(C)** Non-synonymous SNVs that were enriched in recipient 'e' of 4° transplant as compared to recipient 'f' of the same passage (shown in graph on the right, titled '4°'). The frequency of these SNVs was then tracked in 1° and 4° passages. Red dotted circle on graph titled '4°' encircles those SNVs that are only detected in one recipient but not the other recipient of this passage.

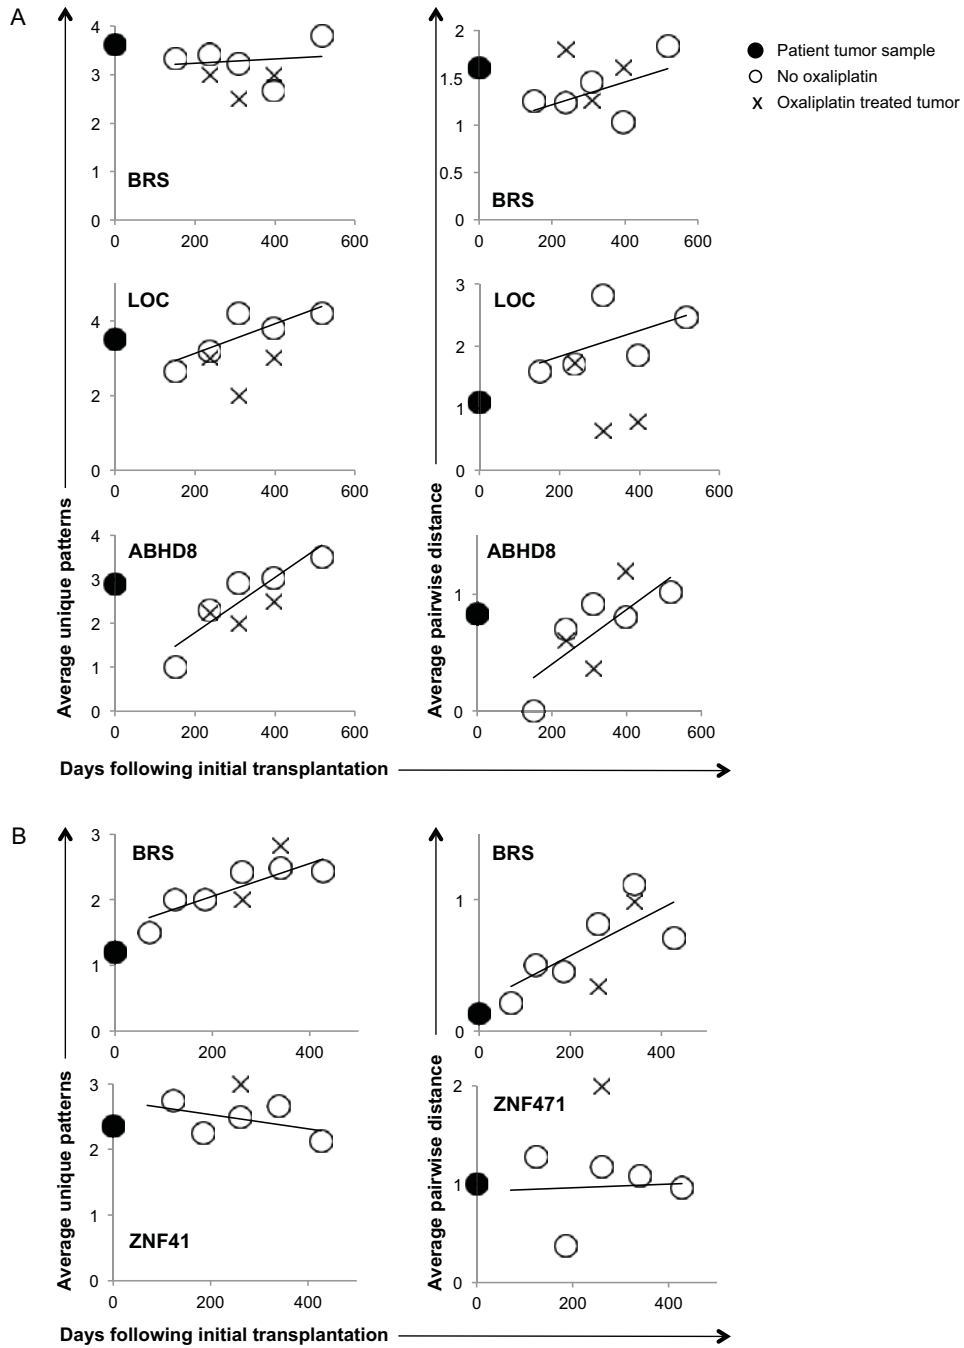

**Fig. S10. Diversity in CRC samples and corresponding xenografts.**

Sample passenger DNA methylation patterns from different regions of the primary cancers CT38 (A) and CT54 (B), and their xenografts. Two measures of tumor population diversity were computed. Left column, average unique patterns: average number of unique patterns observed when

6 to 8 epialleles were sampled from a small patient tumor or xenograft region. Right column, average pairwise distance: average number of differences between the 6 to 8 epialleles sampled from a small patient tumor or xenograft region. Multiple loci were tested (BRS, LOC, ABH, ZNP). Each circle represents data of one tumor. In general there appears to be no evidence for a severe bottleneck with xenotransplantation, and population diversity is maintained with xenograft age. Oxaliplatin does not have any consistent effect on population diversity.

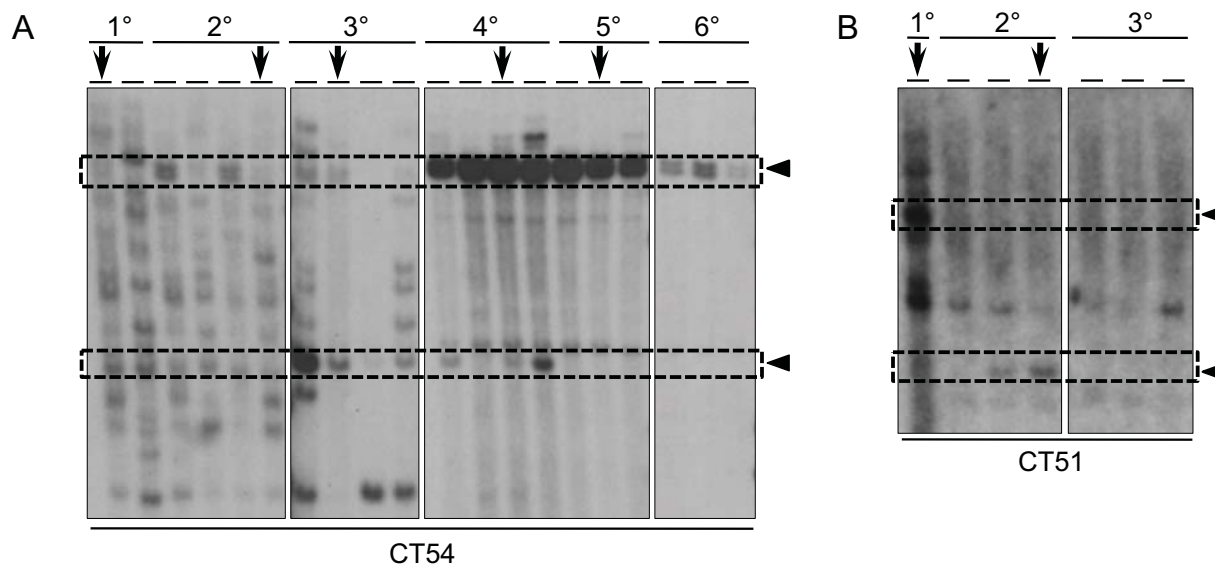

**Fig. S11. Clonal behavior of lentivirally marked clones.**

Southern blots tracing the integration site pattern of CT54 (A) and CT51 (B). Each lane represents the tumor DNA of one mouse; transplant number is depicted above the blot (1<sup>o</sup>, 2<sup>o</sup>, 3<sup>o</sup>, etc.) and the arrow above certain lanes indicates the tumor that was re-injected into the next set of mice. Southern blot band patterns were confirmed by re-digesting samples with a different restriction enzyme.

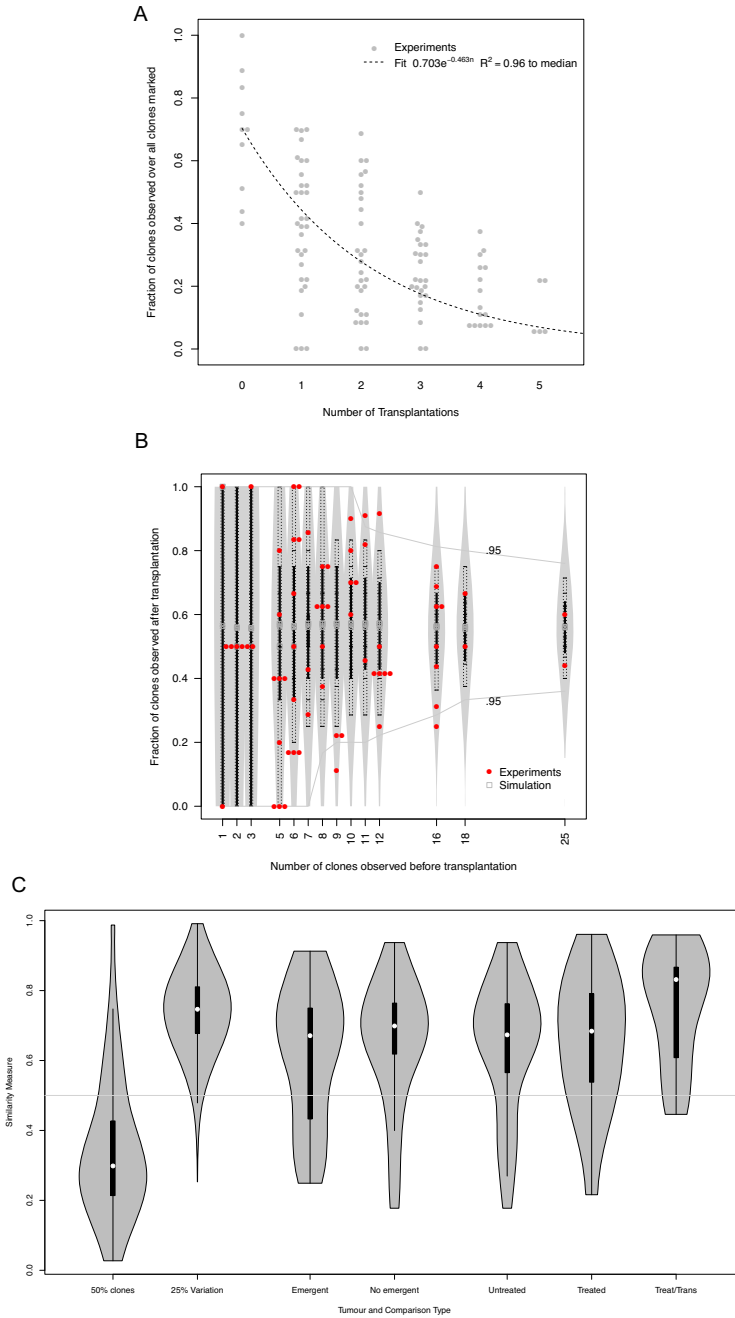

**Fig. S12. Mathematical modeling of clonal emergence.**

(A) Exponential Fit. Data points illustrate fraction of LV clones observed at each transplantation compared to the total number of LV clones observed throughout the serial transplant experiment, with an exponential fit to the median at each transplant. (B) Monte-Carlo Simulation. This plot describes the simulated and real dependency between the number of LV clones in a given xenograft



tumor and the fraction of those LV clones observed after transplantation. The simulated distribution is plotted using violin plots. (C) Similarity measures using quantitative analysis of LV clones that were successfully retransplanted (conserved LV clones). The similarity measures plot shows the distribution of similarities in terms of conserved LV clone proportions between a given xenograft and its sequential transplants. Two examples are given to illustrate ideal cases and serve as comparison points for the other plots: (1) the '50% LV clones' plot shows the distribution obtained when all LV clones are taken into account, but 50% of them are not present in the transplanted tumor, (2) the '25% Variation' plot shows a simulated distribution when a 25% Gaussian noise is added to the original LV clone proportion vector. The horizontal line at 0.5 indicates the expected value for the comparison of two randomly generated LV clone proportions with all clones present. The 'Emergent' and 'No Emergent' plots compare the similarities of conserved LV clone proportions in tumors that have emergent LV clones (first time Type IV or first time Type V) or not. The 'Untreated,' 'Treated,' and 'Treated/Trans' plots compare the similarities of conserved LV clone proportions in untreated tumors, oxaliplatin treated tumors, and oxaliplatin treated tumors which have been transplanted.

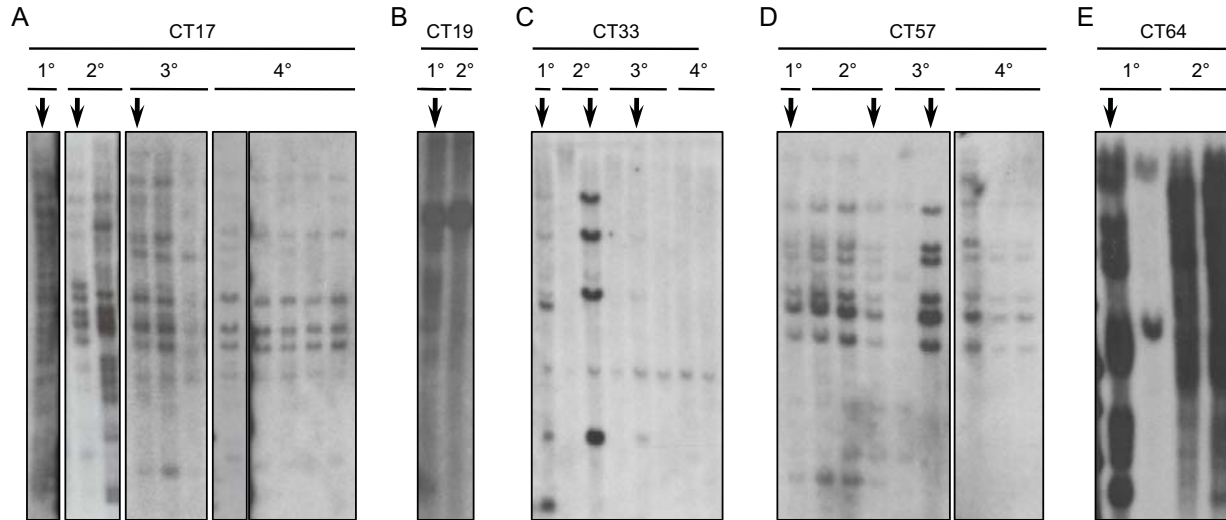

**Fig. S13. Integration site analysis by Southern blotting.**

(A-E) Southern blots tracing the integration site pattern of different patients over several transplants in mice. Each lane represents the tumor DNA of one mouse; transplant number is depicted above the blot (1°, 2°, 3°, etc.) and the arrow above certain lanes indicates the tumor that was re-injected into the next set of mice. Clonal tracking (CT) numbers, representing different patients samples, are shown above each panel.

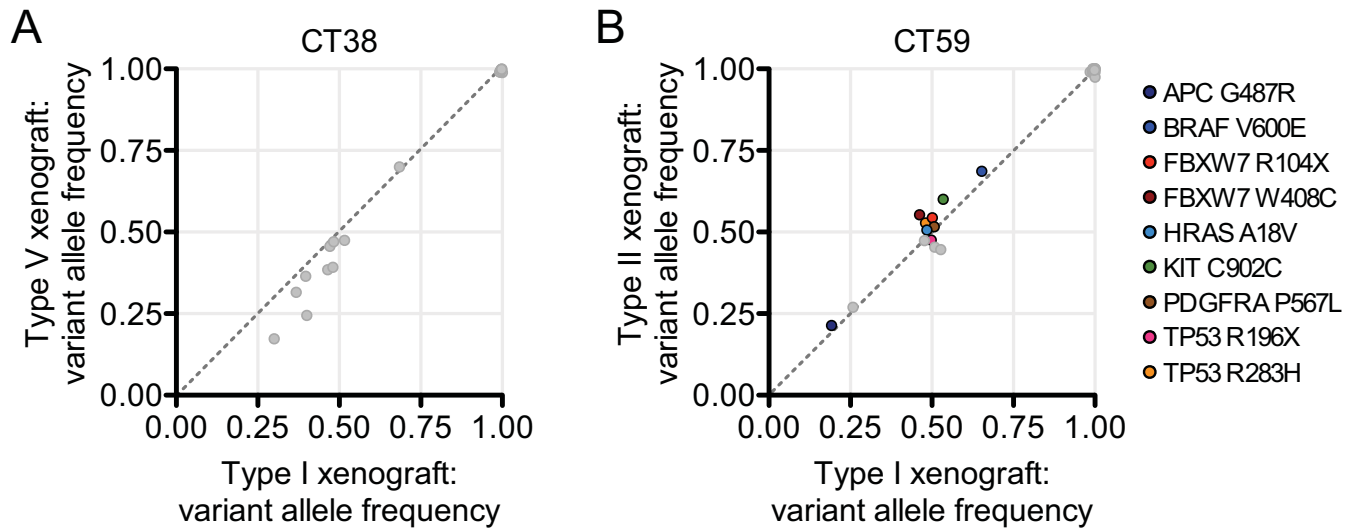

**Fig. S14. Variant allele frequency comparisons between single-cell derived LV clones.**

GFP-expressing tumor cells from CT38 (**A**) and CT59 (**B**) were separated using fluorescence activated cell sorting and viable cells were injected subcutaneously at varying cell doses in a limiting dilution assay. Tumor DNA was isolated from tumors that were generated at a cell dose, where it was statistically estimated that one cell formed the tumor. DNA was profiled using Southern blotting to confirm the presence of one insertion. Tumors that were confirmed to be generated by one LV clone were subjected to targeted deep sequencing using the RainDance platform. Frequency of both germline (gray) and somatic variants (colored circles) is shown.

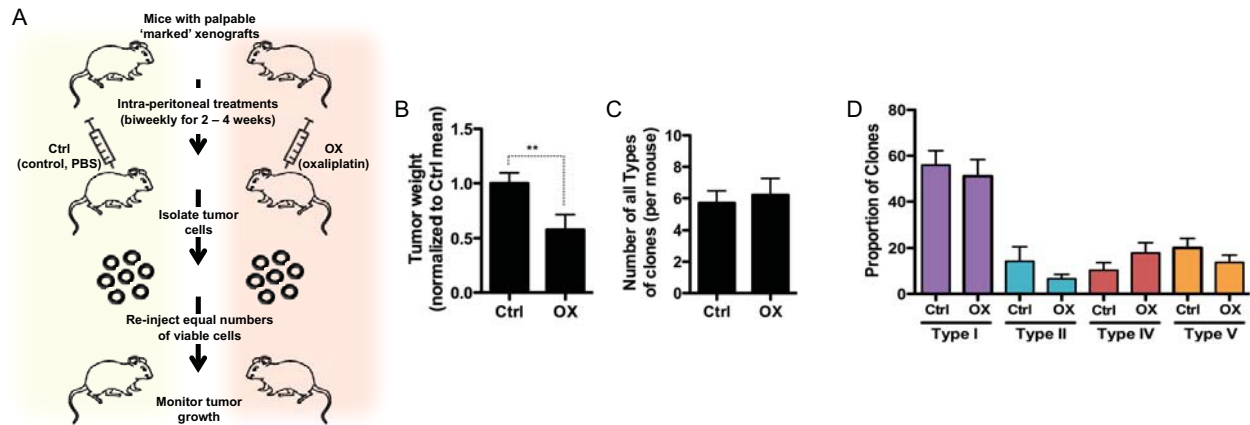

**Fig. S15. Variable response of marked clones to oxaliplatin.**

**(A)** Schematic representation of the experimental approach. Xenografts that were used for the initial treatment were obtained from previously transduced cells that had generated tumors in mice and for which the LV clones were defined. From these marked xenografts, cells were re-injected into mice and the chemotherapy experiment was initiated once these tumors were palpable. Mice were either treated with PBS (Ctrl) or oxaliplatin (OX) for 2 to 4 weeks and cells from these 'primary' tumors were re-injected into 'secondary' mice, which did not receive further treatment. **(B)** Tumor weight after administration of oxaliplatin *in vivo*. Tumor weights were normalized to mean tumor weight of Ctrl group and data was pooled from five patient samples, representing 28 Ctrl and 26 OX mice. **(C)** Cumulative number of LV clones per mouse in Ctrl and OX groups immediately following treatment. **(D)** Proportion of LV clone types in primary mice following oxaliplatin treatment.

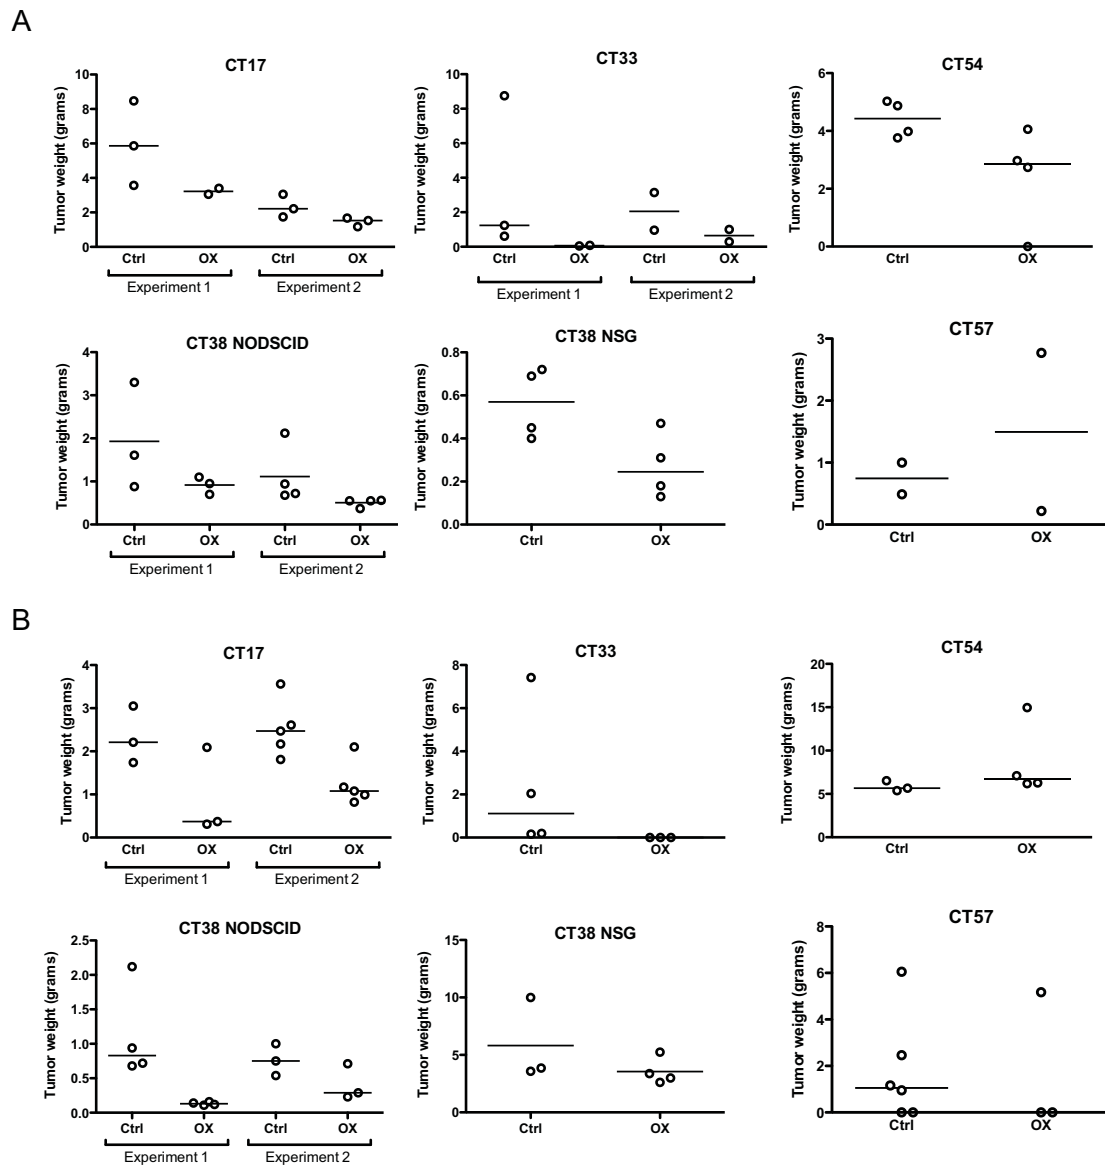

**Fig. S16. Oxaliplatin administration reduces tumor size in mice.**

(A) Graphs displaying tumor weights after the mice were either treated with vehicle (Ctrl) or oxaliplatin (OX) for 2 to 4 weeks. Mice were sacrificed 2 to 5 days after the last OX treatment and the tumor weights were recorded. (B) Tumor growth is reduced after re-injection of OX-treated tumors. Graphs are displaying tumor weights in secondary mice that were injected with a previously Ctrl- or OX-treated tumor; the mice did not receive any further treatment. (A-B) Each circle represents the data of one mouse and lines represent median tumor weights.

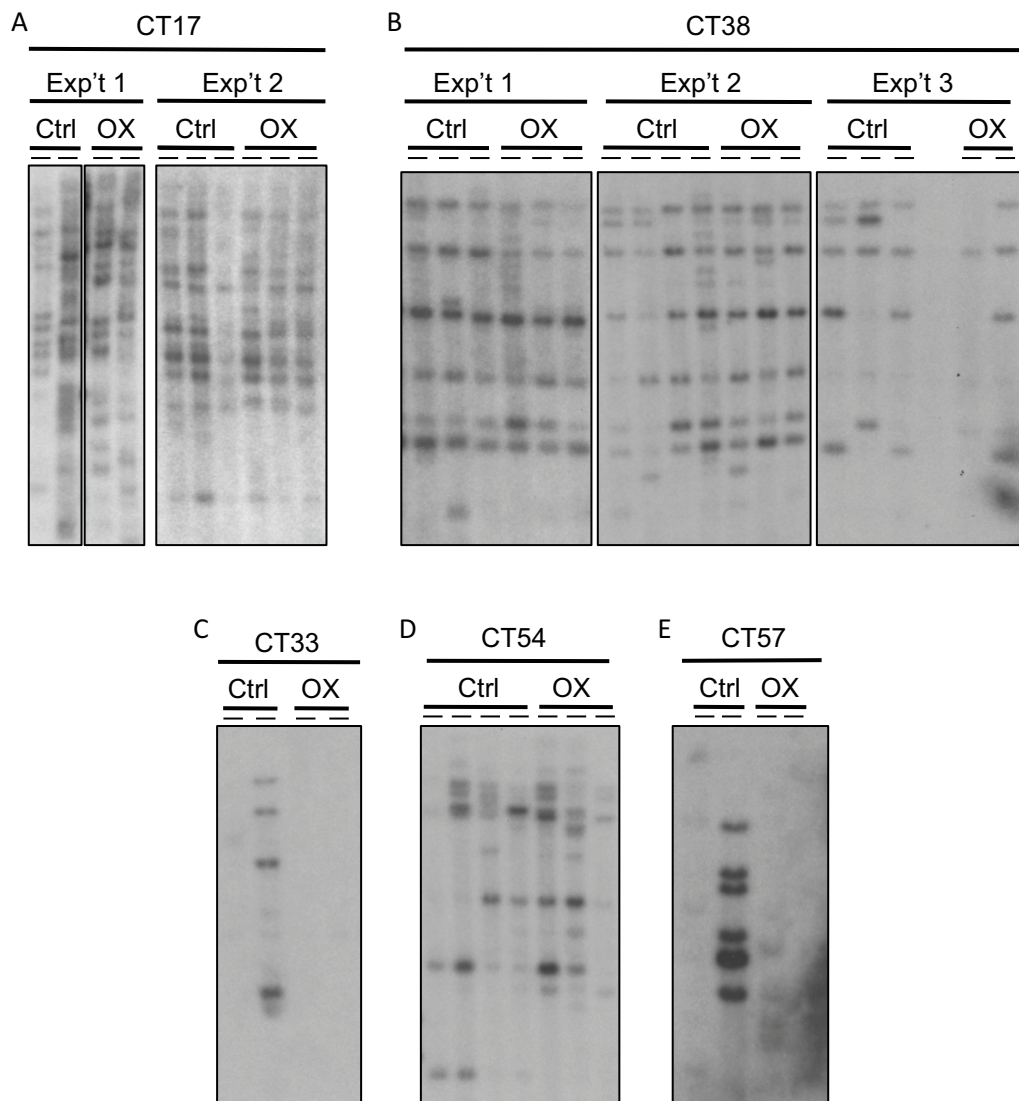

**Fig. S17. Clonal distribution after oxaliplatin treatment.**

(A-E) Southern blots illustrating the clonal behavior observed after oxaliplatin treatment. Mice were sacrificed 2-5 days after the last oxaliplatin treatment and tumor DNA was extracted. Each lane represents the tumor DNA of one mouse.

**Table S1.** Tumor samples and patient characteristics<sup>1</sup>

| Experiment ID | Age | Sex | Tumor site | Stage | Microsatellite status <sup>2</sup> | Prior chemotherapy      |
|---------------|-----|-----|------------|-------|------------------------------------|-------------------------|
| CT15          | 41  | M   | liver      | IV    | MSS                                | FOLFOX                  |
| CT17          | 83  | M   | liver      | IV    | MSS                                | None                    |
| CT19          | 70  | M   | liver      | IV    | n.d. <sup>1</sup>                  | CPT-11, Avastin, Xeloda |
| CT33          | 86  | F   | colon      | IIIC  | MSS                                | None                    |
| CT38          | 64  | M   | colon      | III   | MSS                                | None                    |
| CT51          | 66  | M   | colon      | IIIB  | MSS                                | None                    |
| CT54          | 47  | F   | colon      | IIA   | MSI-H                              | None                    |
| CT57          | 79  | M   | colon      | IIA   | MSS                                | None                    |
| CT59          | 69  | F   | colon      | IV    | MSI-H                              | None                    |
| CT64          | 62  | M   | liver      | IV    | MSS                                | FOLFOX                  |

<sup>1</sup> n.d., no data available

<sup>2</sup> MSS, microsatellite stable; MSI-H, microsatellite instability high frequency

**Table S2.** Engraftment of CRC cells at different sites

| Sample | Injection site | No. of cells injected | No. of mice injected | No. of tumors formed |
|--------|----------------|-----------------------|----------------------|----------------------|
| CRC001 | Colon          | 5E+05                 | 1                    | 0                    |
| CRC002 | Colon          | 5E+05                 | 1                    | 0                    |
| CRC003 | Colon          | 1E+05                 | 3                    | 0                    |
| CRC004 | Colon          | 1E+05                 | 3                    | 0                    |
|        | Liver          | 1E+05                 | 3                    | 0                    |
| CRC005 | Colon          | 2E+06                 | 3                    | 1                    |
|        | Liver          | 2E+06                 | 3                    | 0                    |
| CRC006 | Colon          | 2E+05                 | 1                    | 0                    |
|        | Liver          | 2E+05                 | 1                    | 0                    |
| CRC007 | Colon          | 6E+05                 | 1                    | 0                    |
|        | Liver          | 6E+05                 | 1                    | 0                    |
| CRC008 | Colon          | 1E+06                 | 1                    | 0                    |
|        | Liver          | 1E+06                 | 1                    | 0                    |
| CRC009 | Colon          | 1E+06                 | 1                    | 0                    |
|        | Liver          | 1E+06                 | 1                    | 0                    |
| CRC010 | Colon          | 1E+06                 | 2                    | 0                    |
|        | Liver          | 1E+06                 | 2                    | 0                    |
| CRC011 | Colon          | 1E+06                 | 1                    | 0                    |
|        | Liver          | 1E+06                 | 1                    | 0                    |
| CRC012 | Colon          | 5E+05                 | 1                    | 0                    |
| CRC013 | Colon          | 1E+06                 | 1                    | 0                    |
| CRC014 | Colon          | 1E+06                 | 2                    | 0                    |
|        | Liver          | 1E+06                 | 2                    | 0                    |



**Table S3.** Integration sites of lentiviral vectors in human CRC cells

| Insertion ID <sup>1</sup> | Insertion locus <sup>2</sup> |           | Gene locus <sup>3</sup> name (region) |
|---------------------------|------------------------------|-----------|---------------------------------------|
|                           | Chr.                         | Position  |                                       |
| A_01                      | 10                           | 7803490   | KIN (intron)                          |
| A_02                      | 10                           | 64571154  | EGR2 (3'), ADO (3')                   |
| A_03                      | 11                           | 64699177  | PPP2R5B (intron)                      |
| A_04                      | 9                            | 140536901 | EHMT1 (intron)                        |
| B_01                      | 1                            | 231070911 | TTC13 (intron)                        |
| B_02                      | 12                           | 80061572  | PAWR (intron)                         |
| B_03                      | 15                           | 98510681  | ARRDC4 (intron)                       |
| B_04                      | 2                            | 148745299 | ORC4L (intron)                        |
| B_05                      | 22                           | 43359448  | PACSIN2 (intron)                      |
| C_01                      | 1                            | 78078772  | ZZZ3 (intron)                         |
| C_02                      | 2                            | 84851618  | DNAH6 (exon)                          |
| C_03                      | 2                            | 198044186 | ANKRD44 (intron)                      |
| C_04                      | 6                            | 5141666   | LYRM4 (intron)                        |
| C_05                      | 6                            | 31379519  | MICA (intron), HCP5 (intron)          |
| C_06                      | 8                            | 117776823 | UTP23 (5'), EIF3B (5')                |
| D_01                      | 1                            | 78270014  | FAM73 (intron)                        |
| D_02                      | 1                            | 240010391 | CHRM3 (intron)                        |
| D_03                      | 2                            | 55790854  | SMEK2 (intron)                        |
| D_04                      | 8                            | 144876267 | SCRIB (intron)                        |
| D_05                      | 13                           | 40241324  | COG6 (intron)                         |
| D_06                      | 17                           | 73785509  | UNK (intron)                          |

<sup>1</sup> Insertions identified by two or more independent splinkerette PCR reactions

<sup>2</sup> Human assembly GRCh37

<sup>3</sup> Genes adjacent to the insertions site

**Table S4.** Listing of copy number segments in paired copy number analysis

| Patient ID | Chrom.                                   | Cytoband                   | Segment start | Segment end | Segment mean (log2) | Copy number | Segment size (kb) | Total # of gene in segment                                         | First 10 genes in segment                                                      | Total # of miRNA in segment | First 10 miRNAs in segment               |
|------------|------------------------------------------|----------------------------|---------------|-------------|---------------------|-------------|-------------------|--------------------------------------------------------------------|--------------------------------------------------------------------------------|-----------------------------|------------------------------------------|
| CT38       | 12                                       | p13.1                      | 13,040,237    | 13,070,902  | -0.842              | 1.120       | 31                | 2                                                                  | HEBP1, HTR7P1                                                                  | 0                           |                                          |
|            | 18                                       | q12.1                      | 25,154,000    | 67,230,220  | -1.026              | 1.085       | 42,076            | 156                                                                | MIR302F, DSC3, DSC2, DSC1, DSG1, DSG4, DSG3, DSG2, TTR, B4GALT6                | 0                           |                                          |
| CT54       | No new copy number changes in xenografts |                            |               |             |                     |             |                   |                                                                    |                                                                                |                             |                                          |
| CT59       | 1                                        | p35.1                      | 32,935,980    | 33,161,218  | -1.084              | 0.940       | 225               | 7                                                                  | SYNC, KIAA1522, YARS, S100PBP, FNDC5, HPCA, TMEM54                             | 0                           |                                          |
|            | 1                                        | q31.1                      | 185,610,830   | 185,913,759 | -0.830              | 1.130       | 303               | 0                                                                  |                                                                                | 0                           |                                          |
|            | 2                                        | p25.3                      | 2,772         | 50,356,406  | -0.581              | 1.411       | 50,354            | 283                                                                | FAM110C, SH3YL1, ACP1, FAM150B, TMEM18, SNTG2, TPO, PXDN, MYT1L, LOC730811     | 0                           |                                          |
|            | 2                                        | q33.1                      | 202,313,659   | 202,874,779 | 0.759               | 3.380       | 561               | 8                                                                  | ALS2, CDK15, FZD7, SUMO1, NOP58, SNORD70, SNORD11B, SNORD11                    | 0                           |                                          |
|            | 6                                        | p25.3                      | 94,649        | 7,341,437   | -1.210              | 1.231       | 7,247             | 55                                                                 | DUSP22, IRF4, EXOC2, HUS1, LOC285768, FOXQ1, FOXF2, FOXC1, GMDS, C6orf195      | 0                           |                                          |
|            | 6                                        | p22.3                      | 17,161,878    | 17,286,173  | -0.594              | 1.330       | 124               | 0                                                                  |                                                                                | 0                           |                                          |
|            | 6                                        | q24.3                      | 146,456,373   | 147,024,177 | -0.772              | 1.170       | 568               | 3                                                                  | GRM1, RAB32, C6orf103                                                          | 0                           |                                          |
|            | 7                                        | q21.13;<br>q21.2;<br>q21.3 | 89,146,000    | 158,820,000 | 0.430               | 2.831       | 69,674            | 544                                                                | DPY19L2P4, STEAP1, STEAP2, C7orf63, GTPBP10, CLDN12, CDK14, FZD1, MTERF, AKAP9 | 3                           | hsa-mir-1285-1, hsa-mir-653, hsa-mir-489 |
| 16         | q22.1                                    | 66,915,438                 | 67,932,447    | -1.024      | 0.980               | 1,017       | 14                | PRMT7, SMPD3, ZFP90, CDH3, CDH1, TMCO7, HAS3, CHTF8, CIRH1A, SNTB2 | 0                                                                              |                             |                                          |

|                |                   |            |            |        |       |       |     |                                                                             |   |                                                    |
|----------------|-------------------|------------|------------|--------|-------|-------|-----|-----------------------------------------------------------------------------|---|----------------------------------------------------|
| 17             | p13.3             | 514        | 4,867,000  | 0.797  | 3.505 | 4,866 | 104 | RPH3AL, C17orf97, FAM101B, VPS53, FAM57A, GEMIN4, ELP2P, GLOD4, RNMTL1, NXN | 4 | hsa-mir-22, hsa-mir-132, hsa-mir-212, hsa-mir-1253 |
| 18             | q21.31;<br>q21.32 | 54,218,857 | 56,626,154 | -0.976 | 1.020 | 2,407 | 14  | NEDD4L, MIR122, ALPK2, MALT1, ZNF532, LOC390858, SEC11C, GRP, RAX, CPLX4    | 1 | hsa-mir-122                                        |
| 2 <sup>a</sup> | p16.3             | 50,323,000 | 50,619,000 | 1.265  | 3.231 | 296   | 1   | NRXN1                                                                       | 0 |                                                    |

<sup>a</sup> copy number detected only in 2° tumours 1 and 2



|         |       |           |             |                   |              |          |          |            |   |   |         |        |        |        |        |        |        |        |        |        |        |        |        |       |       |
|---------|-------|-----------|-------------|-------------------|--------------|----------|----------|------------|---|---|---------|--------|--------|--------|--------|--------|--------|--------|--------|--------|--------|--------|--------|-------|-------|
| SACM1L  | chr3  | intrinsic | 45,754,749  |                   |              |          |          | rs2248991  | G | A | 78,300  | 50.1%  | 46.9%  | 49.1%  | 43.3%  | 46.5%  | 47.9%  | 53.4%  | 42.0%  | 48.5%  | 48.9%  | 48.1%  | 42.6%  | 49.7% | 43.0% |
| SCRN3   | chr2  | exon2     | 175,263,063 | nonsynonymous SNV | NM_024583    | c.G52A   | p.D18N   | rs10497410 | G | A | 101,020 | 46.0%  | 52.0%  | 53.6%  | 45.7%  | 46.2%  | 53.8%  | 54.0%  | 52.2%  | 50.0%  | 53.6%  | 50.0%  | 52.4%  | 48.6% | 52.3% |
| SENP6   | chr6  | exon23    | 76,425,288  | nonsynonymous SNV | NM_001100409 | c.A3296G | p.Y1099C | rs9250     | A | G | 554,196 | 100.0% | 99.7%  | 100.0% | 99.9%  | 99.9%  | 99.9%  | 99.9%  | 99.9%  | 99.7%  | 99.7%  | 99.7%  | 99.9%  | 99.7% | 99.3% |
| SFTPC   | chr8  | exon5     | 22,021,517  | nonsynonymous SNV | NM_003018    | c.G557A  | p.S186N  | rs1124     | G | A | 26,108  | 45.8%  | 27.8%  | 35.5%  | 19.9%  | 23.8%  | 17.6%  | 6.6%   | 4.1%   | 7.4%   | 33.8%  | 0.6%   | 0.4%   | 55.3% | 39.4% |
| SFTPC   | chr8  | intrinsic | 22,021,388  |                   |              |          |          | rs2070687  | C | G | 93,079  | 53.3%  | 72.2%  | 63.5%  | 80.1%  | 76.6%  | 83.0%  | 93.0%  | 95.9%  | 92.2%  | 66.3%  | 97.0%  | 100.0% | 43.9% | 60.3% |
| SMO     | chr7  | intrinsic | 128,845,018 |                   |              |          |          | rs2703091  | C | T | 289,191 | 99.5%  | 100.0% | 99.7%  | 99.8%  | 99.5%  | 99.3%  | 99.5%  | 99.7%  | 99.5%  | 99.7%  | 97.8%  | 99.5%  | 99.9% | 99.1% |
| SMO     | chr7  | intrinsic | 128,846,469 |                   |              |          |          | rs2735842  | A | G | 528,537 | 99.8%  | 100.0% | 100.0% | 99.6%  | 99.7%  | 100.0% | 99.9%  | 100.0% | 99.9%  | 100.0% | 99.8%  | 99.6%  | 99.8% | 99.9% |
| SPAG11B | chr8  | intrinsic | 7,308,729   |                   |              |          |          | rs2294141  | G | C | 175,019 | 44.0%  | 29.0%  | 28.3%  | 29.3%  | 31.7%  | 23.4%  | 32.0%  | 27.2%  | 28.5%  | 29.3%  | 25.5%  | 25.0%  | 32.8% | 27.1% |
| STK11   | chr19 | UTR5      | 1,206,903   |                   |              |          |          |            | T | C | 28,052  | 23.7%  | 25.2%  | 27.7%  | 27.5%  | 22.7%  | 23.7%  | 22.8%  | 27.1%  | 30.9%  | 22.7%  | 21.7%  | 21.8%  | 27.9% | 24.6% |
| SYNE2   | chr14 | intrinsic | 64,686,207  |                   |              |          |          | rs915057   | A | G | 350,328 | 100.0% | 100.0% | 100.0% | 99.4%  | 99.7%  | 100.0% | 99.9%  | 100.0% | 100.0% | 99.7%  | 99.4%  | 99.5%  | 99.8% | 99.7% |
| TACC2   | chr10 | exon3     | 123,970,530 | nonsynonymous SNV | NM_206860    | c.T824C  | p.V275A  | rs2295873  | T | C | 197,098 | 44.9%  | 52.9%  | 46.1%  | 52.9%  | 45.6%  | 49.2%  | 51.4%  | 54.8%  | 48.8%  | 43.2%  | 45.8%  | 47.4%  | 40.0% | 41.9% |
| TACC3   | chr4  | exon4     | 1,729,953   | nonsynonymous SNV | NM_006342    | c.G824A  | p.C275Y  | rs17132047 | G | A | 63,753  | 44.7%  | 54.3%  | 53.1%  | 59.1%  | 61.1%  | 48.6%  | 44.3%  | 44.7%  | 38.6%  | 42.5%  | 43.3%  | 40.7%  | 48.2% | 52.1% |
| TACC3   | chr4  | exon4     | 1,729,988   | nonsynonymous SNV | NM_006342    | c.G859A  | p.G287S  | rs1063743  | G | A | 66,659  | 45.9%  | 56.1%  | 55.0%  | 61.2%  | 62.1%  | 48.9%  | 46.0%  | 46.6%  | 40.9%  | 44.2%  | 44.6%  | 40.7%  | 47.8% | 53.0% |
| TECPR2  | chr14 | exon9     | 102,901,201 | nonsynonymous SNV | NM_001172631 | c.A2047G | p.I683V  | rs10149146 | A | G | 212,212 | 47.5%  | 46.7%  | 52.2%  | 49.2%  | 52.3%  | 44.1%  | 51.3%  | 50.2%  | 51.5%  | 50.5%  | 47.2%  | 47.3%  | 47.9% | 52.2% |
| TP53    | chr17 | exon4     | 7,579,472   | nonsynonymous SNV | NM_001126114 | c.C215G  | p.P72R   | rs1042522  | G | C | 239,696 | 99.8%  | 99.8%  | 99.8%  | 99.8%  | 99.8%  | 100.0% | 99.5%  | 100.0% | 100.0% | 99.6%  | 99.8%  | 99.7%  | 99.3% | 99.6% |
| TP53    | chr17 | intrinsic | 7,579,801   |                   |              |          |          | rs1642785  | G | C | 50,453  | 100.0% | 100.0% | 100.0% | 100.0% | 100.0% | 97.4%  | 100.0% | 100.0% | 100.0% | 99.3%  | 100.0% | 99.2%  | 98.6% | 99.3% |
| UBQLN3  | chr11 | exon2     | 5,529,139   | synonymous SNV    | NM_017481    | c.A1650G | p.A550A  | rs2234456  | T | C | 8,966   | 47.6%  | 31.7%  | 0.2%   | 0.0%   | 0.4%   | 0.0%   | 1.2%   | 0.0%   | 0.6%   | 0.2%   | 0.2%   | 0.0%   | 0.7%  | 0.6%  |
| USP34   | chr2  | exon53    | 61,468,761  | synonymous SNV    | NM_014709    | c.A6711G | p.K2237K | rs72884996 | T | C | 75,307  | 54.3%  | 58.6%  | 49.7%  | 42.3%  | 47.4%  | 46.8%  | 53.9%  | 50.6%  | 45.1%  | 59.0%  | 48.2%  | 60.4%  | 48.0% | 53.4% |









|        |       |        |             |                   |              |          |         |            |   |   |         |       |        |       |       |       |       |       |       |       |
|--------|-------|--------|-------------|-------------------|--------------|----------|---------|------------|---|---|---------|-------|--------|-------|-------|-------|-------|-------|-------|-------|
| TP53   | chr17 | exon5  | 7,578,430   | nonsynonymous SNV | NM_001126114 | c.A500C  | p.Q167P |            | T | G | 79,720  | 49.2% | 60.7%  | 62.2% | 63.5% | 61.1% | 65.7% | 60.9% | 61.7% | 59.9% |
| TP53   | chr17 | exon6  | 7,578,263   | stopgain SNV      | NM_001126114 | c.C586T  | p.R196X |            | G | A | 83,674  | 0.0%  | 13.7%  | 33.4% | 41.1% | 35.7% | 38.9% | 35.4% | 37.0% | 32.9% |
| TRAK2  | chr2  | exon5  | 202,264,156 | nonsynonymous SNV | NM_015049    | c.G424A  | p.V142I | rs13022344 | C | T | 274,054 | 99.7% | 100.0% | 99.7% | 99.7% | 99.5% | 99.6% | 99.5% | 99.7% | 99.7% |
| UBQLN1 | chr9  | exon10 | 86,278,913  | synonymous SNV    | NM_013438    | c.G1494A | p.S498S | rs2781004  | C | T | 103,755 | 51.7% | 47.4%  | 41.3% | 50.0% | 49.8% | 53.6% | 47.1% | 52.9% | 52.1% |
| USP19  | chr3  | exon2  | 49,156,473  | nonsynonymous SNV | NM_001199162 | c.G106C  | p.D36H  | rs11552724 | C | G | 83,816  | 55.1% | 54.9%  | 48.3% | 50.4% | 44.6% | 44.7% | 45.6% | 43.3% | 47.7% |
| USP4   | chr3  | exon5  | 49,362,369  | synonymous SNV    | NM_199443    | c.G591A  | p.K197K | rs56038006 | C | T | 112,461 | 49.0% | 45.2%  | 53.2% | 41.7% | 54.3% | 49.7% | 47.4% | 53.8% | 49.6% |











|          |       |            |           |                   |           |          |         |   |   |        |      |       |        |        |        |        |        |        |        |
|----------|-------|------------|-----------|-------------------|-----------|----------|---------|---|---|--------|------|-------|--------|--------|--------|--------|--------|--------|--------|
| TYR      | chr11 | upstream   | 88910985  |                   |           |          |         | T | C | 17,329 | 0.0% | 56.4% | 100.0% | 100.0% | 100.0% | 100.0% | 100.0% | 100.0% | 100.0% |
| UGGT1    | chr2  | ncRNA      | 128922271 |                   |           |          |         | A | T | 22,772 | 0.0% | 38.7% | 49.6%  | 49.0%  | 48.4%  | 47.5%  | 46.7%  | 42.7%  |        |
| UHRF1BP1 | chr6  | UTR5       | 34759881  |                   |           |          |         | A | G | 1,080  | 1.6% | 10.3% | 0.0%   | 16.9%  | 13.0%  | 7.0%   | 0.0%   | 28.3%  |        |
| UHRF1BP1 | chr6  | UTR5       | 34759884  |                   |           |          |         | G | C | 1,481  | 2.3% | 10.0% | 0.0%   | 17.6%  | 13.3%  | 6.3%   | 1.9%   | 28.0%  |        |
| UNK      | chr17 | intronic   | 73814962  |                   |           |          |         | T | C | 22,007 | 0.0% | 33.8% | 27.6%  | 39.8%  | 46.6%  | 44.8%  | 32.9%  | 52.0%  |        |
| USP25    | chr21 | exon12     | 17197364  | nonsynonymous SNV | NM_013396 | c.C1288A | p.Q430K | C | A | 3,019  | 0.0% | 41.2% | 25.0%  | 41.2%  | 48.8%  | 50.0%  | 33.3%  | 40.6%  |        |
| USP37    | chr2  | intronic   | 219394561 |                   |           |          |         | A | G | 9,138  | 0.0% | 34.3% | 44.1%  | 44.9%  | 39.6%  | 50.0%  | 54.2%  | 55.2%  |        |
| VPS13B   | chr8  | splicing   | 100520141 |                   |           |          |         | T | A | 29,493 | 0.3% | 28.9% | 48.8%  | 51.2%  | 49.8%  | 50.9%  | 62.1%  | 53.8%  |        |
| WBP2     | chr17 | upstream   | 73851586  |                   |           |          |         | A | C | 8,072  | 0.0% | 36.3% | 62.3%  | 44.8%  | 45.2%  | 47.8%  | 46.0%  | 52.9%  |        |
| WDFY4    | chr10 | exon9      | 49939538  | nonsynonymous SNV | NM_020945 | c.C1513T | p.R505W | C | T | 30,293 | 0.0% | 34.5% | 54.5%  | 49.8%  | 48.3%  | 47.0%  | 53.0%  | 53.0%  |        |
| WDFY4    | chr10 | intronic   | 49995011  |                   |           |          |         | G | A | 8,384  | 0.0% | 30.9% | 52.7%  | 47.0%  | 62.8%  | 47.3%  | 50.0%  | 48.1%  |        |
| WDR34    | chr9  | intronic   | 131399661 |                   |           |          |         | G | A | 1,925  | 0.0% | 43.3% | 38.9%  | 47.6%  | 50.0%  | 54.2%  | 38.5%  | NoCall |        |
| WDR64    | chr1  | intergenic | 241995707 |                   |           |          |         | G | A | 4,551  | 0.0% | 31.4% | 32.8%  | 61.5%  | 44.9%  | 37.5%  | 50.8%  | 40.0%  |        |
| ZBTB41   | chr1  | intronic   | 197141251 |                   |           |          |         | C | A | 3,093  | 0.0% | 17.9% | 34.0%  | 38.6%  | 50.0%  | 21.1%  | 36.4%  | 46.5%  |        |
| ZBTB5    | chr9  | exon2      | 37441885  | nonsynonymous SNV | NM_014872 | c.G664T  | p.G222W | C | A | 48,968 | 0.1% | 33.9% | 38.7%  | 48.0%  | 49.3%  | 40.5%  | 27.6%  | 47.2%  |        |
| ZNF320   | chr19 | intergenic | 53418645  |                   |           |          |         | A | G | 276    | 1.7% | 10.3% | 12.1%  | 6.9%   | 10.5%  | 4.9%   | 9.2%   | 7.7%   |        |

**Table S9.** Non-synonymous SNVs preferentially expressed in one of two 1° recipients (recipient was used for further transplantation) and detected in subsequent transplants

| Gene  | Chr  | Exon  | Pos      | NCBI Ref  | Coding  | Protein | Ref. Allele | Var. Allele | Variant Allele Frequency (%) |               |               |      |               |       |               |       |
|-------|------|-------|----------|-----------|---------|---------|-------------|-------------|------------------------------|---------------|---------------|------|---------------|-------|---------------|-------|
|       |      |       |          |           |         |         |             |             | Patient Normal               | Patient Tumor | 1° xenografts |      | 2° xenografts |       | 4° xenografts |       |
|       |      |       |          |           |         |         |             |             |                              | tm1           | tm2           | tm1  | tm2           | tm1   | tm2           |       |
| APBA1 | chr9 | exon2 | 72131594 | NM_001163 | c.G533C | p.G178A | C           | G           | 0.0%                         | 0.0%          | 1.7%          | 8.1% | 4.3%          | 13.1% | 8.9%          | 25.4% |



**Table S10.** Non-synonymous SNVs preferentially expressed in one of two 2° recipients (recipient was used for further transplantation) and detected in subsequent transplants

| Gene       | Chr   | Exon   | Pos       | NCBI Ref     | Coding   | Protein  | Ref. Allele | Var. Allele | Variant Allele Frequency (%) |               |               |      |               |       |               |       |
|------------|-------|--------|-----------|--------------|----------|----------|-------------|-------------|------------------------------|---------------|---------------|------|---------------|-------|---------------|-------|
|            |       |        |           |              |          |          |             |             | Patient Normal               | Patient Tumor | 1° xenografts |      | 2° xenografts |       | 4° xenografts |       |
|            |       |        |           |              |          |          |             |             |                              |               | tm1           | tm2  | tm1           | tm2   | tm1           | tm2   |
| AHI1       | chr6  | exon24 | 135644434 | NM_017651    | c.A3194G | p.N1065S | T           | C           | 0.0%                         | 0.0%          | 0.5%          | 1.0% | 1.3%          | 9.8%  | 6.2%          | 15.0% |
| ANKHD1     | chr5  | exon15 | 139876775 | NM_017747    | c.T2916G | p.D972E  | T           | G           | 0.0%                         | 0.0%          | 0.7%          | 1.9% | 1.6%          | 13.0% | 6.8%          | 16.7% |
| APP        | chr21 | exon7  | 27372413  | NM_000484    | c.C950T  | p.A317V  | G           | A           | 0.6%                         | 0.0%          | 1.0%          | 0.5% | 1.3%          | 5.5%  | 5.4%          | 14.4% |
| BMP5       | chr6  | exon4  | 55638918  | NM_021073    | c.A956G  | p.N319S  | T           | C           | 0.0%                         | 0.0%          | 1.6%          | 1.3% | 1.8%          | 15.8% | 7.3%          | 6.7%  |
| C1QTNF3    | chr5  | exon1  | 34043117  | NM_181435    | c.A114C  | p.K38N   | T           | G           | 0.0%                         | 0.0%          | 1.1%          | 1.1% | 1.1%          | 6.0%  | 6.6%          | 18.2% |
| C1QTNF3    | chr5  | exon1  | 34043124  | NM_181435    | c.G107C  | p.R36T   | A           | G           | 0.2%                         | 0.0%          | 1.2%          | 1.2% | 1.1%          | 5.7%  | 5.3%          | 14.1% |
| C1R        | chr12 | exon3  | 7242770   | NM_001733    | c.G306C  | p.K102N  | C           | G           | 0.0%                         | 0.0%          | 1.8%          | 1.6% | 1.7%          | 9.1%  | 5.5%          | 16.9% |
| C1R        | chr12 | exon3  | 7242771   | NM_001733    | c.A305G  | p.K102R  | T           | C           | 0.0%                         | 0.0%          | 1.8%          | 1.6% | 1.7%          | 9.1%  | 5.5%          | 16.8% |
| C9orf93    | chr9  | exon24 | 15874567  | NM_173550    | c.G3506C | p.S1169T | G           | C           | 0.0%                         | 0.0%          | 0.6%          | 0.9% | 1.4%          | 8.4%  | 5.6%          | 13.7% |
| C9orf93    | chr9  | exon24 | 15874557  | NM_173550    | c.T3496A | p.S1166T | T           | A           | 0.0%                         | 0.6%          | 0.7%          | 1.0% | 1.5%          | 6.8%  | 5.6%          | 13.1% |
| C9orf93    | chr9  | exon24 | 15874554  | NM_173550    | c.T3493C | p.W1165R | T           | C           | 0.0%                         | 0.0%          | 0.7%          | 1.0% | 1.5%          | 7.0%  | 5.1%          | 13.3% |
| CCDC85A    | chr2  | exon4  | 56599605  | NM_001080433 | c.A1444T | p.T482S  | A           | T           | 0.9%                         | 0.4%          | 1.3%          | 1.6% | 1.1%          | 7.5%  | 9.9%          | 21.7% |
| CHSY3      | chr5  | exon3  | 129521281 | NM_175856    | c.C2446A | p.L816I  | C           | A           | 0.0%                         | 0.0%          | 0.8%          | 0.7% | 1.4%          | 6.8%  | 5.2%          | 14.4% |
| CSGALNACT2 | chr10 | exon2  | 43651159  | NM_018590    | c.T562G  | p.L188V  | T           | G           | 0.0%                         | 0.0%          | 1.4%          | 0.8% | 1.6%          | 5.3%  | 5.0%          | 18.5% |
| CSGALNACT2 | chr10 | exon2  | 43651193  | NM_018590    | c.A596C  | p.E199A  | A           | C           | 0.0%                         | 0.0%          | 1.5%          | 1.2% | 1.4%          | 10.5% | 6.0%          | 14.8% |
| FAM5C      | chr1  | exon2  | 190423956 | NM_199051    | c.C65T   | p.A22V   | G           | A           | 0.0%                         | 0.0%          | 0.2%          | 1.7% | 2.0%          | 6.7%  | 8.4%          | 16.1% |
| FNIP1      | chr5  | exon13 | 131013443 | NM_133372    | c.A1472G | p.D491G  | T           | C           | 0.0%                         | 0.0%          | 0.8%          | 1.5% | 2.0%          | 5.1%  | 7.0%          | 9.6%  |
| GLUD2      | chrX  | exon1  | 120182856 | NM_012084    | c.T1318C | p.F440L  | T           | C           | 0.0%                         | 0.0%          | 0.4%          | 1.1% | 1.9%          | 7.8%  | 6.3%          | 22.1% |
| GOT1       | chr10 | exon6  | 101163577 | NM_002079    | c.A697G  | p.N233D  | T           | C           | 0.0%                         | 0.0%          | 0.0%          | 0.0% | 1.6%          | 5.1%  | 7.5%          | 19.0% |
| GPR98      | chr5  | exon31 | 89986745  | NM_032119    | c.C6838T | p.L2280F | C           | T           | 0.0%                         | 0.0%          | 1.0%          | 0.3% | 1.5%          | 6.2%  | 6.3%          | 17.6% |
| GPR98      | chr5  | exon31 | 89986731  | NM_032119    | c.C6824T | p.T2275I | C           | T           | 0.0%                         | 0.0%          | 1.7%          | 0.2% | 1.5%          | 6.7%  | 6.4%          | 17.0% |
| HEPACAM    | chr11 | exon3  | 124793682 | NM_152722    | c.A652G  | p.M218V  | T           | C           | 0.0%                         | 0.0%          | 1.9%          | 1.2% | 1.8%          | 10.1% | 7.2%          | 16.0% |
| HMBOX1     | chr8  | exon4  | 28827905  | NM_024567    | c.G369T  | p.E123D  | G           | T           | 0.0%                         | 0.0%          | 1.3%          | 0.7% | 1.2%          | 5.0%  | 5.1%          | 19.0% |
| KCNH7      | chr2  | exon7  | 163291885 | NM_173162    | c.C1756A | p.Q586K  | G           | T           | 0.0%                         | 0.0%          | 0.5%          | 0.8% | 1.5%          | 5.1%  | 5.1%          | 15.9% |
| KIAA1429   | chr8  | exon8  | 95538788  | NM_183009    | c.G1684A | p.V562I  | C           | T           | 0.0%                         | 0.0%          | 0.3%          | 1.0% | 1.1%          | 6.9%  | 5.0%          | 14.8% |
| LRRC7      | chr1  | exon20 | 70509755  | NM_020794    | c.A3974T | p.H1325L | A           | T           | 0.0%                         | 0.0%          | 0.8%          | 0.9% | 1.5%          | 6.0%  | 5.8%          | 10.5% |
| MAP1A      | chr15 | exon4  | 43814365  | NM_002373    | c.C694G  | p.P232A  | C           | G           | 0.0%                         | 0.2%          | 1.3%          | 0.7% | 0.9%          | 6.8%  | 5.9%          | 18.6% |
| MB21D2     | chr3  | exon1  | 192635604 | NM_178496    | c.A26G   | p.N9S    | T           | C           | 0.0%                         | 0.0%          | 0.0%          | 1.2% | 1.1%          | 7.7%  | 5.7%          | 19.6% |
| MLL2       | chr12 | exon31 | 49434586  | NM_003482    | c.A6967G | p.T2323A | T           | C           | 0.0%                         | 0.0%          | 1.5%          | 1.1% | 0.9%          | 5.6%  | 6.3%          | 13.8% |
| MLLT10     | chr10 | exon9  | 21959510  | NM_001195626 | c.A928G  | p.T310A  | A           | G           | 0.0%                         | 0.0%          | 0.0%          | 1.6% | 1.4%          | 7.3%  | 6.2%          | 10.6% |
| MRPS9      | chr2  | exon7  | 105706382 | NM_182640    | c.G580C  | p.V194L  | G           | C           | 0.0%                         | 0.0%          | 1.7%          | 0.8% | 1.4%          | 15.1% | 6.5%          | 17.3% |
| MTERF      | chr7  | exon3  | 91503660  | NM_006980    | c.G448A  | p.V150M  | C           | T           | 0.0%                         | 0.0%          | 1.0%          | 0.8% | 0.6%          | 5.4%  | 5.6%          | 16.9% |
| MTERF      | chr7  | exon3  | 91503657  | NM_006980    | c.A451G  | p.T151A  | T           | C           | 0.2%                         | 0.0%          | 1.0%          | 0.9% | 0.6%          | 5.3%  | 5.2%          | 17.0% |
| MYH9       | chr22 | exon27 | 36691074  | NM_002473    | c.G3534C | p.E1178D | C           | G           | 0.4%                         | 0.0%          | 0.6%          | 0.4% | 0.9%          | 7.1%  | 5.8%          | 20.2% |
| MYO1E      | chr15 | exon24 | 59453335  | NM_004998    | c.G2722A | p.V908I  | C           | T           | 0.5%                         | 0.0%          | 1.1%          | 1.7% | 0.9%          | 6.4%  | 5.9%          | 14.2% |
| MYST3      | chr8  | exon8  | 41834696  | NM_001099413 | c.T1193C | p.V398A  | A           | G           | 0.0%                         | 0.0%          | 1.8%          | 1.2% | 0.9%          | 6.5%  | 5.9%          | 15.5% |
| NFX1       | chr9  | exon16 | 33351619  | NM_002504    | c.C2486T | p.T829M  | C           | T           | 0.0%                         | 0.0%          | 1.4%          | 1.3% | 1.9%          | 5.9%  | 5.7%          | 18.8% |
| NKRF       | chrX  | exon3  | 118725102 | NM_017544    | c.A286T  | p.I96F   | T           | A           | 0.3%                         | 0.0%          | 1.0%          | 1.2% | 2.0%          | 7.2%  | 5.9%          | 11.1% |
| NSD1       | chr5  | exon2  | 176563005 | NM_022455    | c.T901C  | p.S301P  | T           | C           | 0.0%                         | 0.3%          | 1.5%          | 1.5% | 1.5%          | 8.8%  | 6.8%          | 17.1% |
| NSD1       | chr5  | exon2  | 176562966 | NM_022455    | c.A862C  | p.T288P  | A           | C           | 0.0%                         | 0.0%          | 1.5%          | 1.0% | 1.4%          | 6.2%  | 5.7%          | 15.2% |
| NSD1       | chr5  | exon2  | 176562960 | NM_022455    | c.A856C  | p.T286P  | A           | C           | 0.0%                         | 0.3%          | 1.8%          | 1.2% | 1.8%          | 5.5%  | 5.2%          | 14.3% |
| PHF10      | chr6  | exon11 | 170105283 | NM_133325    | c.A1351G | p.M451V  | T           | C           | 0.0%                         | 0.0%          | 1.4%          | 0.8% | 1.2%          | 8.6%  | 7.2%          | 20.7% |
| PKD2L1     | chr10 | exon9  | 102054351 | NM_016112    | c.C1600A | p.R534S  | G           | T           | 0.2%                         | 0.3%          | 0.5%          | 1.3% | 1.8%          | 6.8%  | 8.5%          | 20.6% |
| PKDCC      | chr2  | exon1  | 42275890  | NM_138370    | c.T551C  | p.V184A  | T           | C           | 0.0%                         | 0.0%          | 1.9%          | 0.9% | 1.0%          | 5.3%  | 5.2%          | 13.5% |
| PPM1B      | chr2  | exon2  | 44428491  | NM_177968    | c.A153C  | p.E51D   | A           | C           | 0.0%                         | 0.0%          | 1.3%          | 1.2% | 1.9%          | 8.0%  | 5.8%          | 22.1% |
| PPM1B      | chr2  | exon2  | 44428492  | NM_177968    | c.G154A  | p.D52N   | G           | A           | 0.0%                         | 0.0%          | 1.5%          | 1.5% | 1.9%          | 8.1%  | 5.8%          | 22.3% |

|         |       |         |           |              |           |           |   |   |      |      |      |      |      |       |      |       |
|---------|-------|---------|-----------|--------------|-----------|-----------|---|---|------|------|------|------|------|-------|------|-------|
| PPP1CC  | chr12 | exon5   | 111160461 | NM_002710    | c.G563A   | p.R188Q   | C | T | 0.0% | 0.0% | 1.8% | 1.0% | 0.9% | 7.3%  | 6.7% | 9.8%  |
| RBBP5   | chr1  | exon13  | 205064043 | NM_005057    | c.G1546A  | p.A516T   | C | T | 0.0% | 0.0% | 1.2% | 0.8% | 1.6% | 6.4%  | 6.7% | 20.0% |
| RBFOX1  | chr16 | exon8   | 7680656   | NM_145892    | c.C788G   | p.A263G   | C | G | 0.0% | 0.3% | 1.5% | 1.2% | 1.9% | 5.2%  | 6.4% | 15.8% |
| RBM46   | chr4  | exon5   | 155749119 | NM_144979    | c.A1502C  | p.Y501S   | A | C | 0.0% | 0.0% | 1.7% | 0.2% | 0.7% | 7.9%  | 6.1% | 12.8% |
| RBM46   | chr4  | exon5   | 155749130 | NM_144979    | c.G1513A  | p.G505S   | G | A | 0.0% | 0.0% | 1.7% | 0.2% | 1.0% | 5.9%  | 6.0% | 11.5% |
| RNF139  | chr8  | exon2   | 125499506 | NM_007218    | c.G1616A  | p.R539H   | G | A | 0.0% | 0.0% | 1.8% | 1.3% | 1.3% | 7.4%  | 5.3% | 12.4% |
| RNF170  | chr8  | exon7   | 42711442  | NM_001160223 | c.C637T   | p.L213F   | G | A | 0.0% | 0.0% | 1.0% | 0.7% | 2.0% | 6.8%  | 6.2% | 12.9% |
| SFRS18  | chr6  | exon12  | 99848900  | NM_032870    | c.A1934C  | p.Q645P   | T | G | 0.0% | 0.0% | 1.4% | 1.4% | 1.4% | 5.2%  | 6.7% | 22.8% |
| SFRS18  | chr6  | exon12  | 99848905  | NM_032870    | c.T1929G  | p.D643E   | A | C | 0.1% | 0.0% | 1.4% | 1.6% | 1.7% | 6.3%  | 6.2% | 21.6% |
| SFRS18  | chr6  | exon5   | 99858781  | NM_032870    | c.A337G   | p.T113A   | T | C | 0.0% | 0.0% | 1.5% | 1.9% | 2.0% | 6.6%  | 7.2% | 15.1% |
| SRCAP   | chr16 | exon26  | 30740334  | NM_006662    | c.A5706T  | p.E1902D  | A | T | 0.0% | 0.0% | 1.6% | 1.7% | 1.7% | 7.9%  | 5.9% | 15.9% |
| TIAM1   | chr21 | exon29  | 32493039  | NM_003253    | c.C4423G  | p.P1475A  | G | C | 0.2% | 0.0% | 0.0% | 1.4% | 1.1% | 5.1%  | 6.0% | 22.1% |
| TSSK2   | chr22 | exon1   | 19119120  | NM_053006    | c.G208C   | p.G70R    | G | C | 0.1% | 0.1% | 1.0% | 0.9% | 1.6% | 5.8%  | 5.4% | 18.4% |
| TTN     | chr2  | exon44  | 179622425 | NM_133432    | c.A10384T | p.T3462S  | T | A | 0.0% | 0.0% | 1.0% | 0.3% | 1.5% | 6.5%  | 5.8% | 16.2% |
| TTN     | chr2  | exon186 | 179400376 | NM_003319    | c.C73771T | p.P24591S | G | A | 0.0% | 0.0% | 1.5% | 0.2% | 1.9% | 8.4%  | 5.0% | 12.0% |
| USP38   | chr4  | exon1   | 144106873 | NM_032557    | c.T270G   | p.H90Q    | T | G | 0.0% | 0.0% | 1.9% | 2.0% | 1.7% | 6.1%  | 5.6% | 14.0% |
| VDAC3   | chr8  | exon7   | 42259355  | NM_001135694 | c.G376C   | p.V126L   | G | C | 0.0% | 0.0% | 1.2% | 1.2% | 1.8% | 5.8%  | 5.1% | 14.4% |
| ZAK     | chr2  | exon12  | 174086046 | NM_133646    | c.A1156G  | p.I386V   | A | G | 0.0% | 0.0% | 1.8% | 1.7% | 1.0% | 6.9%  | 6.3% | 20.9% |
| ZCCHC11 | chr1  | exon11  | 52947166  | NM_015269    | c.C1777G  | p.Q593E   | G | C | 0.0% | 0.0% | 2.0% | 1.1% | 1.7% | 13.2% | 7.1% | 15.8% |
| ZEB1    | chr10 | exon7   | 31810640  | NM_030751    | c.A2377G  | p.I793V   | A | G | 0.0% | 0.0% | 0.9% | 0.3% | 0.3% | 5.1%  | 5.7% | 16.3% |
| ZNF148  | chr3  | exon4   | 125032353 | NM_021964    | c.T132G   | p.D44E    | A | C | 0.2% | 0.0% | 0.4% | 0.7% | 1.0% | 6.9%  | 5.2% | 13.8% |

**Table S11.** Non-synonymous SNVs preferentially expressed in one of two 4° recipients

| Gene     | Chr   | Exon   | Pos       | NCBI Ref     | Coding    | Protein  | Ref. Allele | Var. Allele | Variant Allele Frequency (%) |               |               |      |               |      |               |       |
|----------|-------|--------|-----------|--------------|-----------|----------|-------------|-------------|------------------------------|---------------|---------------|------|---------------|------|---------------|-------|
|          |       |        |           |              |           |          |             |             | Patient Normal               | Patient Tumor | 1° xenografts |      | 2° xenografts |      | 4° xenografts |       |
|          |       |        |           |              |           |          |             |             |                              |               | tm1           | tm2  | tm1           | tm2  | tm1           | tm2   |
| ABCA2    | chr9  | exon16 | 139912088 | NM_001606    | c.C2273G  | p.P758R  | G           | C           | 0.0%                         | 0.0%          | 0.0%          | 0.2% | 0.6%          | 1.2% | 1.9%          | 12.7% |
| ABCA2    | chr9  | exon16 | 139912070 | NM_001606    | c.C2291T  | p.P764L  | G           | A           | 0.0%                         | 0.0%          | 0.0%          | 0.3% | 0.8%          | 1.2% | 1.6%          | 13.0% |
| ABCC10   | chr6  | exon18 | 43415527  | NM_001198934 | c.C3811G  | p.Q1271E | C           | G           | 0.0%                         | 0.0%          | 1.1%          | 0.0% | 0.6%          | 0.4% | 1.5%          | 10.4% |
| ADORA2A  | chr22 | exon2  | 24829500  | NM_000675    | c.A128T   | p.Y43F   | A           | T           | 0.2%                         | 0.0%          | 0.2%          | 0.1% | 1.4%          | 1.9% | 1.3%          | 13.9% |
| AGAP3    | chr7  | exon13 | 150837197 | NM_031946    | c.A1798G  | p.T600A  | A           | G           | 0.0%                         | 0.4%          | 0.4%          | 0.9% | 0.5%          | 0.9% | 1.4%          | 9.6%  |
| ANKRD17  | chr4  | exon21 | 73984466  | NM_198889    | c.G3374C  | p.G1125A | C           | G           | 0.0%                         | 0.0%          | 0.0%          | 0.2% | 1.1%          | 1.4% | 1.4%          | 12.4% |
| ANKRD17  | chr4  | exon21 | 73984467  | NM_198889    | c.G3373A  | p.G1125S | C           | T           | 0.2%                         | 0.0%          | 0.0%          | 0.2% | 1.1%          | 1.4% | 1.4%          | 12.1% |
| ANKS1A   | chr6  | exon11 | 34985259  | NM_015245    | c.G1433A  | p.R478Q  | G           | A           | 0.0%                         | 0.0%          | 0.4%          | 0.3% | 0.4%          | 1.5% | 2.0%          | 11.0% |
| ANKS1A   | chr6  | exon11 | 34985264  | NM_015245    | c.A1438G  | p.S480G  | A           | G           | 0.0%                         | 0.3%          | 0.3%          | 0.4% | 0.4%          | 1.1% | 2.0%          | 11.8% |
| ANKS1A   | chr6  | exon11 | 34985270  | NM_015245    | c.A1444G  | p.S482G  | A           | G           | 0.0%                         | 0.0%          | 0.3%          | 0.3% | 0.3%          | 1.7% | 1.9%          | 11.6% |
| ANLN     | chr7  | exon4  | 36445961  | NM_018685    | c.T659C   | p.F220S  | T           | C           | 0.0%                         | 0.0%          | 0.0%          | 0.0% | 0.6%          | 1.7% | 1.0%          | 11.3% |
| ANLN     | chr7  | exon4  | 36445952  | NM_018685    | c.A650G   | p.N217S  | A           | G           | 0.0%                         | 0.0%          | 0.0%          | 0.0% | 0.6%          | 1.1% | 0.8%          | 11.1% |
| ATXN7    | chr3  | exon6  | 63968053  | NM_001177387 | c.C944T   | p.P315L  | C           | T           | 0.0%                         | 0.0%          | 0.4%          | 0.6% | 1.5%          | 0.8% | 0.0%          | 11.7% |
| ATXN7    | chr3  | exon6  | 63968052  | NM_001177387 | c.C943A   | p.P315T  | C           | A           | 0.0%                         | 0.3%          | 0.7%          | 0.6% | 1.5%          | 0.8% | 0.0%          | 11.7% |
| ATXN7L3B | chr12 | exon1  | 74932048  | NM_001136262 | c.G156C   | p.E52D   | G           | C           | 0.0%                         | 0.0%          | 0.0%          | 0.7% | 0.8%          | 1.8% | 1.3%          | 15.8% |
| BCL9     | chr1  | exon8  | 147090839 | NM_004326    | c.C878G   | p.A293G  | C           | G           | 0.0%                         | 0.0%          | 0.6%          | 0.5% | 0.8%          | 1.4% | 1.1%          | 11.4% |
| BCL9     | chr1  | exon8  | 147090823 | NM_004326    | c.T862C   | p.S288P  | T           | C           | 0.1%                         | 0.0%          | 0.7%          | 0.7% | 1.0%          | 1.7% | 1.9%          | 12.2% |
| BSDC1    | chr1  | exon6  | 32844408  | NM_001143888 | c.C496G   | p.Q166E  | G           | C           | 0.0%                         | 0.0%          | 0.4%          | 1.3% | 2.0%          | 1.4% | 0.5%          | 12.3% |
| BTN1A1   | chr6  | exon7  | 26508991  | NM_001732    | c.G1170T  | p.E390D  | G           | T           | 0.0%                         | 0.0%          | 0.0%          | 0.0% | 0.7%          | 1.1% | 1.6%          | 13.0% |
| BTN1A1   | chr6  | exon7  | 26508959  | NM_001732    | c.A1138G  | p.M380V  | A           | G           | 0.0%                         | 0.0%          | 0.0%          | 0.0% | 0.7%          | 1.0% | 1.4%          | 10.3% |
| C10orf2  | chr10 | exon1  | 102748268 | NM_021830    | c.A301T   | p.S101C  | A           | T           | 0.0%                         | 0.0%          | 0.3%          | 0.0% | 1.9%          | 1.3% | 0.5%          | 12.0% |
| C2orf68  | chr2  | exon2  | 85838865  | NM_001013649 | c.T152C   | p.V51A   | A           | G           | 0.0%                         | 0.0%          | 0.6%          | 0.9% | 1.2%          | 1.7% | 0.0%          | 14.3% |
| C3orf21  | chr3  | exon2  | 194947519 | NM_152531    | c.C571T   | p.H191Y  | G           | A           | 0.0%                         | 0.0%          | 0.8%          | 0.3% | 0.9%          | 2.0% | 1.3%          | 14.1% |
| CA7      | chr16 | exon2  | 66881047  | NM_005182    | c.C155T   | p.S52F   | C           | T           | 0.0%                         | 0.0%          | 0.7%          | 0.2% | 0.3%          | 1.4% | 1.9%          | 12.6% |
| CACNA1G  | chr17 | exon32 | 48697095  | NM_198396    | c.T5731G  | p.W1911G | T           | G           | 0.2%                         | 0.0%          | 1.0%          | 0.7% | 2.0%          | 1.3% | 2.0%          | 14.5% |
| CAMK2G   | chr10 | exon18 | 75576812  | NM_172170    | c.T1293A  | p.D431E  | C           | T           | 0.0%                         | 0.0%          | 0.5%          | 0.7% | 0.3%          | 1.8% | 1.1%          | 9.9%  |
| CAMK2G   | chr10 | exon18 | 75576815  | NM_172173    | c.T1248A  | p.F416L  | C           | T           | 0.0%                         | 0.0%          | 0.5%          | 0.8% | 0.3%          | 1.8% | 1.1%          | 10.5% |
| CAMTA1   | chr1  | exon9  | 7725113   | NM_015215    | c.T2506G  | p.S836A  | T           | G           | 0.0%                         | 0.0%          | 0.6%          | 0.2% | 0.5%          | 1.8% | 0.9%          | 14.3% |
| CCDC85A  | chr2  | exon5  | 56603005  | NM_001080433 | c.G1507C  | p.A503P  | G           | C           | 0.0%                         | 0.0%          | 0.2%          | 0.3% | 0.5%          | 1.5% | 1.5%          | 13.7% |
| CCDC85A  | chr2  | exon5  | 56603026  | NM_001080433 | c.G1528A  | p.A510T  | G           | A           | 0.0%                         | 0.0%          | 0.4%          | 0.1% | 0.5%          | 1.5% | 1.2%          | 10.6% |
| CCDC85A  | chr2  | exon5  | 56602997  | NM_001080433 | c.C1499T  | p.P500L  | C           | T           | 0.0%                         | 0.0%          | 0.2%          | 0.1% | 0.5%          | 1.5% | 1.5%          | 13.3% |
| CCDC85A  | chr2  | exon5  | 56602985  | NM_001080433 | c.G1487A  | p.S496N  | G           | A           | 0.0%                         | 0.2%          | 0.2%          | 0.3% | 0.6%          | 1.2% | 1.2%          | 13.9% |
| CELSR3   | chr3  | exon2  | 48694314  | NM_001407    | c.G4216A  | p.A1406T | C           | T           | 0.0%                         | 0.0%          | 0.0%          | 0.0% | 0.9%          | 0.9% | 1.7%          | 16.5% |
| CRY2     | chr11 | exon6  | 45889208  | NM_001127457 | c.C604T   | p.L202F  | C           | T           | 0.0%                         | 0.0%          | 0.5%          | 0.2% | 0.0%          | 1.3% | 1.1%          | 13.6% |
| DCAF7    | chr17 | exon7  | 61666444  | NM_005828    | c.A940G   | p.R314G  | A           | G           | 0.0%                         | 0.0%          | 0.9%          | 0.0% | 0.3%          | 1.8% | 2.0%          | 11.8% |
| DCAF8    | chr1  | exon13 | 160188183 | NM_015726    | c.A1608C  | p.Q536H  | T           | G           | 0.0%                         | 0.0%          | 0.2%          | 0.2% | 1.0%          | 1.9% | 1.9%          | 10.2% |
| DCHS1    | chr11 | exon19 | 6646457   | NM_003737    | c.C7118T  | p.A2373V | G           | A           | 0.0%                         | 0.0%          | 0.5%          | 0.2% | 1.6%          | 1.7% | 1.5%          | 12.0% |
| DCHS1    | chr11 | exon21 | 6645358   | NM_003737    | c.G7549A  | p.A2517T | C           | T           | 0.0%                         | 0.0%          | 0.5%          | 0.2% | 1.1%          | 0.8% | 0.7%          | 12.4% |
| DCHS1    | chr11 | exon21 | 6645366   | NM_003737    | c.G7541C  | p.S2514T | C           | G           | 0.0%                         | 0.0%          | 0.4%          | 0.3% | 1.0%          | 0.8% | 0.7%          | 11.8% |
| DGKG     | chr3  | exon21 | 185906068 | NM_001080744 | c.A1943C  | p.N648T  | T           | G           | 0.0%                         | 0.0%          | 0.2%          | 0.3% | 1.9%          | 1.1% | 1.6%          | 13.1% |
| DHCR24   | chr1  | exon1  | 55352678  | NM_014762    | c.C115T   | p.L39F   | G           | A           | 0.0%                         | 0.0%          | 0.0%          | 0.0% | 1.5%          | 1.5% | 1.3%          | 16.9% |
| DIO3     | chr14 | exon1  | 102028017 | NM_001362    | c.C184T   | p.L62F   | C           | T           | 0.0%                         | 0.0%          | 0.1%          | 0.0% | 1.2%          | 0.5% | 0.2%          | 9.7%  |
| DNAH1    | chr3  | exon66 | 52427395  | NM_015512    | c.A10520T | p.Y3507F | A           | T           | 0.0%                         | 0.0%          | 0.1%          | 0.1% | 0.4%          | 0.7% | 1.9%          | 11.8% |
| DNAH17   | chr17 | exon66 | 76447714  | NM_173628    | c.A10571G | p.K3524R | T           | C           | 0.3%                         | 0.0%          | 1.9%          | 1.0% | 0.4%          | 1.2% | 1.6%          | 10.3% |
| DNAJB12  | chr10 | exon1  | 74114715  | NM_001002762 | c.G43C    | p.V15L   | C           | G           | 0.2%                         | 0.0%          | 0.4%          | 0.3% | 1.9%          | 1.4% | 2.0%          | 11.8% |
| DNHD1    | chr11 | exon14 | 6555170   | NM_144666    | c.C2765T  | p.A922V  | C           | T           | 0.0%                         | 0.0%          | 0.0%          | 0.2% | 0.4%          | 1.0% | 0.8%          | 11.8% |

|          |       |        |           |              |          |          |   |   |      |      |      |      |      |      |      |       |
|----------|-------|--------|-----------|--------------|----------|----------|---|---|------|------|------|------|------|------|------|-------|
| DNHD1    | chr11 | exon14 | 6555212   | NM_144666    | c.A2807G | p.K936R  | A | G | 0.0% | 0.0% | 0.0% | 0.2% | 0.4% | 1.3% | 1.6% | 14.8% |
| DNHD1    | chr11 | exon14 | 6555205   | NM_144666    | c.A2800G | p.M934V  | A | G | 0.0% | 0.0% | 0.0% | 0.2% | 0.4% | 1.3% | 1.6% | 14.8% |
| DNHD1    | chr11 | exon14 | 6555194   | NM_144666    | c.G2789A | p.R930Q  | G | A | 0.1% | 0.0% | 0.0% | 0.2% | 0.4% | 1.3% | 1.6% | 13.6% |
| DSTYK    | chr1  | exon3  | 205138309 | NM_015375    | c.A1306G | p.T436A  | T | C | 0.0% | 0.0% | 0.5% | 0.0% | 0.3% | 1.1% | 0.9% | 11.1% |
| EFNB3    | chr17 | exon2  | 7611407   | NM_001406    | c.G254A  | p.G85E   | G | A | 0.0% | 0.0% | 1.0% | 0.2% | 0.5% | 1.9% | 1.5% | 14.9% |
| EPN3     | chr17 | exon6  | 48617648  | NM_017957    | c.T932C  | p.L311P  | T | C | 0.0% | 0.0% | 0.3% | 0.1% | 1.6% | 1.5% | 1.6% | 13.4% |
| EPN3     | chr17 | exon6  | 48617654  | NM_017957    | c.C938T  | p.E321D  | C | T | 0.0% | 0.0% | 0.3% | 0.1% | 1.3% | 1.1% | 1.6% | 12.7% |
| EPN3     | chr17 | exon6  | 48617639  | NM_017957    | c.T923C  | p.V308A  | T | C | 0.0% | 0.0% | 0.3% | 0.2% | 1.6% | 1.5% | 1.6% | 13.6% |
| FAM120C  | chrX  | exon14 | 54107807  | NM_017848    | c.G2926A | p.G976S  | C | T | 0.0% | 0.0% | 0.9% | 0.5% | 0.0% | 1.8% | 1.7% | 13.9% |
| FAM155A  | chr13 | exon1  | 108518518 | NM_001080396 | c.G427A  | p.G143S  | C | T | 0.0% | 0.0% | 0.6% | 0.0% | 1.7% | 0.6% | 1.6% | 11.5% |
| FAM159A  | chr1  | exon1  | 53099181  | NM_001042693 | c.A16T   | p.T6S    | A | T | 0.0% | 0.0% | 0.0% | 0.0% | 0.0% | 1.1% | 1.1% | 18.3% |
| FBXO32   | chr8  | exon7  | 124518778 | NM_058229    | c.T688G  | p.L230V  | A | C | 0.0% | 0.0% | 0.6% | 0.5% | 0.6% | 1.3% | 1.3% | 10.3% |
| FBXO42   | chr1  | exon10 | 16577563  | NM_018994    | c.G1756A | p.G586S  | C | T | 0.2% | 0.0% | 0.3% | 0.8% | 0.4% | 2.0% | 1.2% | 12.3% |
| FGFR2    | chr10 | exon2  | 123353298 | NM_001144918 | c.G34T   | p.V12L   | C | A | 0.0% | 0.1% | 0.0% | 0.6% | 0.5% | 0.9% | 1.1% | 14.0% |
| FIP1L1   | chr4  | exon12 | 54294205  | NM_001134937 | c.A984C  | p.E328D  | A | C | 0.1% | 0.0% | 1.2% | 0.4% | 1.0% | 1.0% | 1.6% | 11.2% |
| FLNB     | chr3  | exon1  | 57994478  | NM_001457    | c.T187C  | p.Y63H   | T | C | 0.0% | 0.0% | 0.0% | 0.1% | 0.7% | 0.7% | 0.5% | 11.5% |
| FMNL1    | chr17 | exon3  | 43309791  | NM_005892    | c.G271C  | p.V91L   | G | C | 0.2% | 0.0% | 0.2% | 0.1% | 1.0% | 0.7% | 0.8% | 12.9% |
| FNDC1    | chr6  | exon10 | 159650912 | NM_032532    | c.G1246C | p.D416H  | G | C | 0.2% | 0.0% | 0.6% | 0.1% | 0.2% | 1.9% | 1.4% | 10.1% |
| FNDC1    | chr6  | exon10 | 159651028 | NM_032532    | c.G1362A | p.M454I  | G | A | 0.3% | 0.0% | 0.0% | 0.0% | 0.0% | 0.9% | 1.4% | 12.0% |
| FNDC1    | chr6  | exon10 | 159650906 | NM_032532    | c.C1240T | p.P414S  | C | T | 0.0% | 0.0% | 0.4% | 0.1% | 0.2% | 1.9% | 1.4% | 10.0% |
| FRMD4B   | chr3  | exon1  | 69434992  | NM_015123    | c.A149G  | p.Q50R   | T | C | 0.0% | 0.0% | 0.0% | 0.3% | 1.2% | 1.0% | 1.0% | 11.6% |
| GALNT6   | chr12 | exon7  | 51754582  | NM_007210    | c.T1090G | p.S364A  | A | C | 0.0% | 0.0% | 0.4% | 0.3% | 0.8% | 1.4% | 1.3% | 11.7% |
| GAS1     | chr9  | exon1  | 89561133  | NM_002048    | c.A562G  | p.T188A  | T | C | 0.0% | 0.2% | 0.8% | 0.4% | 1.4% | 1.9% | 1.0% | 11.4% |
| GDF6     | chr8  | exon1  | 97172613  | NM_001001557 | c.G308A  | p.R103K  | C | T | 0.0% | 0.0% | 1.0% | 0.3% | 0.0% | 0.9% | 1.8% | 11.3% |
| GLB1L    | chr2  | exon4  | 220107549 | NM_024506    | c.C331A  | p.L111I  | G | T | 0.0% | 0.0% | 0.2% | 0.2% | 0.3% | 0.8% | 0.5% | 11.7% |
| GLB1L    | chr2  | exon4  | 220107548 | NM_024506    | c.T332A  | p.L111Q  | A | T | 0.0% | 0.0% | 0.0% | 0.2% | 0.3% | 0.8% | 0.7% | 11.7% |
| GOLGA3   | chr12 | exon3  | 133393214 | NM_001172557 | c.G318C  | p.K106N  | C | G | 0.0% | 0.0% | 0.0% | 0.7% | 1.2% | 1.6% | 1.6% | 13.3% |
| GORASP1  | chr3  | exon3  | 39144284  | NM_031899    | c.G233A  | p.R78K   | C | T | 0.0% | 0.0% | 0.7% | 0.5% | 0.0% | 0.6% | 1.7% | 10.1% |
| GPER     | chr7  | exon2  | 1131722   | NM_001505    | c.C358G  | p.H120D  | C | G | 0.1% | 0.0% | 0.6% | 0.2% | 1.0% | 1.0% | 1.3% | 12.5% |
| GPER     | chr7  | exon2  | 1131729   | NM_001505    | c.G365A  | p.R122Q  | G | A | 0.1% | 0.1% | 1.3% | 0.4% | 1.1% | 1.5% | 1.1% | 13.0% |
| GPR135   | chr14 | exon1  | 59931001  | NM_022571    | c.A944C  | p.N315T  | T | G | 0.1% | 0.1% | 0.1% | 0.3% | 1.0% | 1.1% | 0.9% | 11.2% |
| GPR135   | chr14 | exon1  | 59931005  | NM_022571    | c.G940A  | p.V314M  | C | T | 0.1% | 0.0% | 0.1% | 0.4% | 1.0% | 1.1% | 0.9% | 11.6% |
| GPR27    | chr3  | exon1  | 71804065  | NM_018971    | c.G865A  | p.V289I  | G | A | 0.0% | 0.0% | 0.3% | 0.2% | 1.7% | 1.1% | 1.3% | 14.4% |
| GPR6     | chr6  | exon1  | 110301345 | NM_005284    | c.C1030T | p.L344F  | C | T | 0.0% | 0.0% | 0.1% | 0.0% | 0.4% | 0.5% | 1.5% | 13.0% |
| GREB1    | chr2  | exon26 | 11770131  | NM_014668    | c.A4507G | p.I1503V | A | G | 0.0% | 0.0% | 0.0% | 0.2% | 1.6% | 0.6% | 1.9% | 12.4% |
| GREB1    | chr2  | exon26 | 11770111  | NM_014668    | c.A4487G | p.Y1496C | A | G | 0.3% | 0.1% | 0.0% | 0.4% | 1.6% | 0.6% | 1.6% | 10.0% |
| GREB1L   | chr18 | exon26 | 19088200  | NM_001142966 | c.A4490G | p.K1497R | A | G | 0.0% | 0.0% | 1.3% | 0.6% | 0.0% | 0.9% | 1.1% | 11.5% |
| GRM8     | chr7  | exon2  | 126883135 | NM_001127323 | c.G124C  | p.V42L   | C | G | 0.0% | 0.0% | 0.2% | 0.3% | 0.2% | 1.6% | 1.5% | 10.6% |
| HAPLN2   | chr1  | exon4  | 156593656 | NM_021817    | c.A143G  | p.H48R   | A | G | 0.0% | 0.0% | 0.0% | 0.0% | 0.4% | 1.0% | 0.6% | 12.6% |
| HCFC1    | chrX  | exon19 | 153218245 | NM_005334    | c.G4662C | p.E1554D | C | G | 0.0% | 0.0% | 0.7% | 0.3% | 1.0% | 1.2% | 0.0% | 11.3% |
| HCFC1    | chrX  | exon19 | 153218276 | NM_005334    | c.C4631A | p.P1544Q | G | T | 0.0% | 0.0% | 0.4% | 0.6% | 1.5% | 0.8% | 0.0% | 11.5% |
| HERPUD2  | chr7  | exon9  | 35673415  | NM_022373    | c.G1106C | p.G369A  | C | G | 0.0% | 0.0% | 0.5% | 0.4% | 1.1% | 2.0% | 1.3% | 12.7% |
| HGF      | chr7  | exon7  | 81372738  | NM_001010933 | c.C781A  | p.Q261K  | G | T | 0.0% | 0.0% | 1.8% | 0.0% | 0.7% | 1.4% | 1.9% | 13.2% |
| HMX2     | chr10 | exon1  | 124908007 | NM_005519    | c.T113C  | p.V38A   | T | C | 0.0% | 0.0% | 0.0% | 0.0% | 0.3% | 0.6% | 0.9% | 11.9% |
| HNRNPUL2 | chr11 | exon7  | 62489628  | NM_001079559 | c.T1320G | p.C440W  | T | C | 0.2% | 0.2% | 0.6% | 1.2% | 1.9% | 1.4% | 0.4% | 12.2% |
| HNRNPUL2 | chr11 | exon10 | 62487586  | NM_001079559 | c.G1689T | p.L563F  | G | A | 0.0% | 0.0% | 0.2% | 0.0% | 0.9% | 1.3% | 1.1% | 10.7% |
| HRH2     | chr5  | exon1  | 175110481 | NM_022304    | c.G245T  | p.C82F   | G | T | 0.0% | 0.1% | 0.1% | 0.1% | 0.4% | 0.5% | 0.2% | 11.0% |
| HRH2     | chr5  | exon1  | 175110498 | NM_022304    | c.A262C  | p.K88Q   | A | C | 0.0% | 0.0% | 0.1% | 0.0% | 0.6% | 1.0% | 0.4% | 12.7% |
| HSPA12A  | chr10 | exon12 | 118434525 | NM_025015    | c.G1795A | p.V599I  | C | T | 0.0% | 0.0% | 0.2% | 0.5% | 1.1% | 1.3% | 1.6% | 11.4% |
| IGFBP4   | chr17 | exon1  | 38600219  | NM_001552    | c.C232A  | p.L78M   | C | A | 0.0% | 0.0% | 0.8% | 0.0% | 1.4% | 1.4% | 1.4% | 12.5% |
| ITPRIPL1 | chr2  | exon3  | 96992989  | NM_001008949 | c.A620G  | p.Q207R  | A | G | 0.0% | 0.0% | 0.0% | 0.0% | 1.5% | 1.2% | 1.8% | 11.7% |
| ITPRIPL1 | chr2  | exon3  | 96992895  | NM_001008949 | c.G526A  | p.V176I  | G | A | 0.0% | 0.0% | 0.5% | 0.3% | 1.3% | 0.6% | 1.4% | 10.5% |

|          |       |        |           |              |           |          |   |   |      |      |      |      |      |      |      |       |
|----------|-------|--------|-----------|--------------|-----------|----------|---|---|------|------|------|------|------|------|------|-------|
| JAK1     | chr1  | exon8  | 65330584  | NM_002227    | c.G1062T  | p.E354D  | C | A | 0.0% | 0.0% | 0.0% | 0.6% | 1.0% | 1.5% | 1.0% | 13.0% |
| JAK1     | chr1  | exon8  | 65330579  | NM_002227    | c.A1067G  | p.K356R  | T | C | 0.0% | 0.0% | 0.0% | 0.9% | 1.4% | 1.5% | 1.0% | 12.6% |
| KCNF1    | chr2  | exon1  | 11052982  | NM_002236    | c.C430A   | p.R144S  | C | A | 0.1% | 0.0% | 0.8% | 0.9% | 1.8% | 1.4% | 2.0% | 16.2% |
| KCNG4    | chr16 | exon2  | 84270745  | NM_172347    | c.G347A   | p.S116N  | C | T | 0.1% | 0.0% | 0.3% | 0.0% | 0.6% | 0.4% | 1.2% | 11.2% |
| KCNH2    | chr7  | exon1  | 150652548 | NM_172057    | c.C44A    | p.A15D   | C | T | 0.0% | 0.0% | 0.0% | 0.7% | 0.0% | 0.6% | 0.9% | 11.4% |
| KCNJ14   | chr19 | exon1  | 48965276  | NM_170720    | c.G295A   | p.A99T   | G | A | 0.0% | 0.0% | 1.0% | 0.4% | 0.7% | 1.0% | 1.4% | 11.9% |
| KCNK2    | chr1  | exon2  | 215259925 | NM_001017425 | c.T261G   | p.H87Q   | T | G | 0.0% | 0.0% | 0.0% | 0.4% | 0.5% | 1.5% | 1.9% | 10.3% |
| KIAA0195 | chr17 | exon18 | 73489859  | NM_014738    | c.G2269A  | p.A757T  | G | A | 0.0% | 0.0% | 0.0% | 0.5% | 0.9% | 1.0% | 1.5% | 11.2% |
| KIAA0913 | chr10 | exon11 | 75553392  | NM_015037    | c.G2360A  | p.S787N  | G | A | 0.0% | 0.0% | 0.3% | 0.0% | 0.7% | 0.6% | 1.1% | 12.1% |
| KIAA1109 | chr4  | exon41 | 123184014 | NM_015312    | c.C6858G  | p.D2286E | C | G | 0.0% | 0.0% | 1.9% | 0.3% | 1.4% | 1.4% | 1.2% | 15.0% |
| KIAA2026 | chr9  | exon1  | 6007349   | NM_001017969 | c.G439T   | p.A147S  | C | A | 0.0% | 0.2% | 0.5% | 0.6% | 1.6% | 1.9% | 1.1% | 10.2% |
| KIF13A   | chr6  | exon38 | 17771437  | NM_022113    | c.C4489T  | p.P1497S | G | A | 0.0% | 0.0% | 0.0% | 0.0% | 0.7% | 0.7% | 1.9% | 11.6% |
| KIF21B   | chr1  | exon20 | 200959408 | NM_017596    | c.G2888A  | p.R963Q  | C | T | 0.0% | 0.0% | 0.3% | 0.5% | 0.3% | 1.4% | 0.7% | 14.0% |
| KIF3C    | chr2  | exon1  | 26203398  | NM_002254    | c.A1389C  | p.E463D  | T | G | 0.1% | 0.1% | 1.2% | 0.2% | 0.4% | 1.7% | 1.3% | 10.7% |
| KLC2     | chr11 | exon16 | 66034377  | NM_001134775 | c.C1819T  | p.L607F  | C | T | 0.1% | 0.0% | 0.2% | 0.0% | 1.9% | 1.2% | 1.8% | 13.2% |
| LGR5     | chr12 | exon11 | 71960667  | NM_003667    | c.A1045G  | p.N349D  | A | G | 0.0% | 0.0% | 0.0% | 0.6% | 1.0% | 0.5% | 1.6% | 10.6% |
| LHFPL5   | chr6  | exon1  | 35773758  | NM_182548    | c.G311C   | p.G104A  | G | C | 0.1% | 0.1% | 0.1% | 0.0% | 0.0% | 0.5% | 0.3% | 10.4% |
| LPPR1    | chr9  | exon3  | 104032304 | NM_017753    | c.C206G   | p.T69S   | C | G | 0.0% | 0.2% | 0.2% | 0.0% | 0.3% | 1.7% | 1.4% | 10.4% |
| LRBA     | chr4  | exon2  | 151935727 | NM_006726    | c.G68A    | p.R23K   | C | T | 0.0% | 0.0% | 1.0% | 0.7% | 0.8% | 1.4% | 1.4% | 11.6% |
| LZTS2    | chr10 | exon3  | 102763577 | NM_032429    | c.G722A   | p.S241N  | G | A | 0.0% | 0.2% | 1.3% | 0.5% | 0.0% | 1.5% | 1.8% | 16.5% |
| MACF1    | chr1  | exon86 | 39920703  | NM_012090    | c.A14832C | p.E4944D | T | C | 0.0% | 0.0% | 0.0% | 0.6% | 1.3% | 1.5% | 1.0% | 12.3% |
| MACF1    | chr1  | exon1  | 39796956  | NM_033044    | c.A16A    | p.L6I    | C | A | 0.0% | 0.0% | 0.0% | 0.9% | 1.4% | 1.3% | 1.2% | 14.0% |
| MAP1A    | chr15 | exon4  | 43817363  | NM_002373    | c.A3692G  | p.N1231S | A | G | 0.1% | 0.0% | 0.3% | 0.2% | 1.2% | 0.7% | 1.8% | 13.3% |
| MAP3K10  | chr19 | exon4  | 40711082  | NM_002446    | c.G1067A  | p.R356Q  | G | A | 0.0% | 0.0% | 0.6% | 0.0% | 0.0% | 1.6% | 1.0% | 11.4% |
| MARK2    | chr11 | exon14 | 63670586  | NM_001163296 | c.G1470C  | p.E490D  | G | C | 0.0% | 0.0% | 0.0% | 0.8% | 0.5% | 0.3% | 0.0% | 10.1% |
| MED13    | chr17 | exon5  | 60111229  | NM_005121    | c.T733G   | p.C245G  | A | C | 0.0% | 0.0% | 0.7% | 0.0% | 0.0% | 1.9% | 0.3% | 9.7%  |
| MED13    | chr17 | exon18 | 60045430  | NM_005121    | c.A4157G  | p.K1386R | T | C | 0.0% | 0.0% | 0.3% | 0.0% | 0.7% | 1.3% | 1.8% | 11.8% |
| MED13    | chr17 | exon28 | 60028311  | NM_005121    | c.C6166A  | p.P2056T | G | T | 0.0% | 0.0% | 1.5% | 0.0% | 0.4% | 0.9% | 2.0% | 14.9% |
| MEPCE    | chr7  | exon1  | 100028656 | NM_019606    | c.C1015T  | p.P339S  | C | T | 0.0% | 0.0% | 0.5% | 0.7% | 1.3% | 1.3% | 1.9% | 12.9% |
| MLL      | chr11 | exon3  | 118343405 | NM_001197104 | c.C1531A  | p.P511T  | C | A | 0.0% | 0.0% | 0.3% | 0.8% | 1.2% | 1.5% | 1.0% | 17.1% |
| MOSPD3   | chr7  | exon2  | 100210497 | NM_001040098 | c.T83C    | p.L28S   | T | C | 0.2% | 0.0% | 0.4% | 0.3% | 0.7% | 0.5% | 1.7% | 14.9% |
| MOSPD3   | chr7  | exon2  | 100210493 | NM_001040098 | c.C79T    | p.P27S   | C | T | 0.0% | 0.0% | 0.4% | 0.4% | 0.7% | 0.5% | 1.7% | 15.2% |
| MTA3     | chr2  | exon14 | 42936243  | NM_020744    | c.T1532C  | p.M511T  | T | C | 0.0% | 0.0% | 0.0% | 0.2% | 0.4% | 1.0% | 1.9% | 11.7% |
| MTA3     | chr2  | exon14 | 42936165  | NM_020744    | c.A1454G  | p.N485S  | A | G | 0.0% | 0.0% | 0.0% | 0.5% | 0.3% | 1.0% | 1.5% | 11.1% |
| MYL9     | chr20 | exon3  | 35176474  | NM_006097    | c.G224A   | p.S75N   | G | A | 0.0% | 0.0% | 0.0% | 0.4% | 0.3% | 0.5% | 1.2% | 16.4% |
| NCOA1    | chr2  | exon18 | 24974922  | NM_003743    | c.A3778G  | p.I1260V | A | G | 0.1% | 0.0% | 0.5% | 0.1% | 0.7% | 1.5% | 0.6% | 12.3% |
| NFE2L1   | chr17 | exon6  | 46135812  | NM_003204    | c.A1128C  | p.L376F  | A | C | 1.0% | 0.4% | 0.6% | 0.4% | 0.5% | 1.0% | 0.6% | 10.9% |
| NFE2L1   | chr17 | exon6  | 46135811  | NM_003204    | c.T1127C  | p.L376S  | T | C | 0.0% | 0.0% | 0.0% | 0.0% | 0.2% | 0.7% | 0.6% | 10.4% |
| NPNT     | chr4  | exon9  | 106863613 | NM_001184693 | c.A1003G  | p.I335V  | A | G | 0.0% | 0.0% | 0.8% | 0.0% | 0.8% | 0.5% | 0.7% | 9.7%  |
| NR2C2    | chr3  | exon4  | 15055162  | NM_003298    | c.C196T   | p.P66S   | C | T | 0.0% | 0.3% | 0.8% | 1.2% | 0.8% | 1.3% | 1.2% | 12.8% |
| NRXN3    | chr14 | exon9  | 79432620  | NM_004796    | c.G1529C  | p.S510T  | G | C | 0.3% | 0.0% | 0.0% | 0.1% | 0.7% | 2.0% | 1.8% | 13.0% |
| NUP153   | chr6  | exon20 | 17625037  | NM_005124    | c.C3929A  | p.P1310H | G | T | 0.0% | 0.0% | 0.5% | 1.3% | 0.0% | 2.0% | 1.9% | 12.9% |
| NUP153   | chr6  | exon19 | 17626267  | NM_005124    | c.A3673G  | p.T1225A | T | C | 0.0% | 0.0% | 0.5% | 0.2% | 0.3% | 1.2% | 0.9% | 12.4% |
| ODF3     | chr11 | exon3  | 197663    | NM_053280    | c.A212G   | p.N71S   | A | G | 0.0% | 0.0% | 0.4% | 0.4% | 1.5% | 0.5% | 0.0% | 14.0% |
| OR10A4   | chr11 | exon1  | 6898030   | NM_207186    | c.T152C   | p.I51T   | T | A | 0.0% | 0.0% | 0.6% | 0.2% | 1.5% | 0.9% | 1.6% | 15.6% |
| PAPPA    | chr9  | exon4  | 118974010 | NM_002581    | c.G1717A  | p.V573I  | G | A | 0.0% | 0.0% | 0.0% | 0.6% | 0.4% | 2.0% | 0.6% | 12.2% |
| PAX3     | chr2  | exon8  | 223066717 | NM_181457    | c.A1366G  | p.T456A  | T | C | 0.0% | 0.2% | 0.0% | 1.1% | 1.0% | 0.8% | 0.6% | 11.0% |
| PCDHGB5  | chr5  | exon1  | 140779521 | NM_018925    | c.G1827T  | p.E609D  | G | T | 0.3% | 0.0% | 0.0% | 0.9% | 1.0% | 1.0% | 1.2% | 14.5% |
| PCDHGC5  | chr5  | exon1  | 140870674 | NM_032407    | c.A1867G  | p.T623A  | A | G | 0.0% | 0.0% | 0.0% | 0.1% | 0.2% | 0.1% | 1.7% | 10.2% |
| PCK2     | chr14 | exon5  | 24568269  | NM_004563    | c.A676G   | p.S226G  | A | G | 0.0% | 0.0% | 0.0% | 0.5% | 0.0% | 1.8% | 1.0% | 14.8% |
| PCNXL3   | chr11 | exon31 | 65402848  | NM_032223    | c.C5113A  | p.L1705M | C | A | 0.1% | 0.0% | 0.2% | 0.0% | 1.5% | 1.9% | 1.1% | 12.6% |
| PDIA4    | chr7  | exon10 | 148700963 | NM_004911    | c.G1861A  | p.D621N  | C | T | 0.0% | 0.1% | 0.5% | 0.2% | 1.2% | 0.5% | 1.9% | 13.2% |

|          |       |        |           |              |          |          |   |   |      |      |      |      |      |      |      |       |
|----------|-------|--------|-----------|--------------|----------|----------|---|---|------|------|------|------|------|------|------|-------|
| PDIA4    | chr7  | exon10 | 148700928 | NM_004911    | c.A1896T | p.E632D  | T | A | 0.0% | 0.0% | 0.3% | 0.1% | 0.6% | 0.5% | 1.5% | 11.3% |
| PDIA4    | chr7  | exon10 | 148700981 | NM_004911    | c.G1843A | p.V615I  | C | T | 0.0% | 0.0% | 0.4% | 0.1% | 1.0% | 0.4% | 1.6% | 12.9% |
| PHACTR1  | chr6  | exon7  | 13206118  | NM_030948    | c.A736C  | p.M246L  | A | C | 0.0% | 0.0% | 0.2% | 0.3% | 0.5% | 0.8% | 1.6% | 10.5% |
| PHF12    | chr17 | exon4  | 27251133  | NM_020889    | c.G509A  | p.S170N  | C | T | 0.0% | 0.0% | 0.3% | 0.5% | 1.3% | 1.7% | 2.0% | 16.5% |
| PIP5K1C  | chr19 | exon7  | 3653425   | NM_001195733 | c.C784A  | p.R262S  | G | T | 0.0% | 0.0% | 0.4% | 0.4% | 0.0% | 1.4% | 1.2% | 9.9%  |
| PITX2    | chr4  | exon6  | 111539752 | NM_153426    | c.A483C  | p.E161D  | A | G | 0.2% | 0.0% | 0.9% | 0.2% | 1.8% | 1.8% | 1.4% | 12.1% |
| PITX2    | chr4  | exon6  | 111539803 | NM_153426    | c.T432A  | p.N144K  | C | T | 0.0% | 0.0% | 1.0% | 0.0% | 1.0% | 1.3% | 1.5% | 11.7% |
| PLEC     | chr8  | exon31 | 144998388 | NM_201381    | c.C5613G | p.D1871E | G | C | 0.0% | 0.0% | 0.5% | 0.3% | 1.2% | 1.3% | 1.4% | 14.3% |
| POF1B    | chrX  | exon2  | 84634365  | NM_024921    | c.G95A   | p.C32Y   | C | T | 0.0% | 0.0% | 0.9% | 0.4% | 1.4% | 1.9% | 0.0% | 11.4% |
| PPP1R9B  | chr17 | exon1  | 48226754  | NM_032595    | c.C1121A | p.P374H  | G | T | 0.1% | 0.0% | 0.3% | 0.0% | 1.4% | 1.1% | 1.9% | 12.3% |
| PRPF40B  | chr12 | exon22 | 50037020  | NM_001031698 | c.A2157T | p.E719D  | A | T | 0.0% | 0.0% | 0.9% | 0.5% | 0.4% | 0.9% | 1.6% | 13.3% |
| PRR14L   | chr22 | exon4  | 32108312  | NM_173566    | c.A5513G | p.K1838R | T | C | 0.0% | 0.2% | 0.0% | 0.6% | 1.2% | 2.0% | 1.8% | 12.6% |
| PTPRS    | chr19 | exon14 | 5231475   | NM_002850    | c.A2001C | p.E667D  | T | G | 0.0% | 0.0% | 0.7% | 0.7% | 0.9% | 1.5% | 1.7% | 13.4% |
| PTPRS    | chr19 | exon14 | 5231458   | NM_002850    | c.G2018A | p.G673D  | C | T | 0.0% | 0.0% | 0.7% | 0.3% | 1.0% | 1.2% | 0.4% | 11.4% |
| PYGM     | chr11 | exon5  | 64525293  | NM_005609    | c.T618A  | p.H206Q  | A | T | 0.0% | 0.0% | 0.0% | 0.5% | 1.2% | 1.0% | 1.6% | 13.9% |
| PYGM     | chr11 | exon5  | 64525294  | NM_005609    | c.A617G  | p.H206R  | T | C | 0.2% | 0.0% | 0.0% | 0.5% | 1.2% | 1.0% | 1.6% | 14.0% |
| R3HDM2   | chr12 | exon19 | 57651841  | NM_014925    | c.G2339A | p.S780N  | C | T | 0.0% | 0.0% | 0.3% | 0.0% | 0.8% | 1.1% | 1.4% | 11.6% |
| RABGAP1L | chr1  | exon7  | 174221655 | NM_014857    | c.T913A  | p.L305I  | T | A | 0.0% | 0.0% | 0.0% | 0.3% | 1.8% | 0.5% | 0.9% | 12.0% |
| RANBP17  | chr5  | exon25 | 170692728 | NM_022897    | c.C2820G | p.I940M  | C | G | 0.0% | 0.0% | 0.0% | 0.4% | 0.0% | 1.7% | 0.6% | 10.4% |
| RBM33    | chr7  | exon5  | 155473553 | NM_053043    | c.C518G  | p.T173S  | C | G | 0.0% | 0.0% | 0.3% | 0.2% | 0.0% | 1.1% | 1.0% | 11.7% |
| RBM47    | chr4  | exon3  | 40440131  | NM_019027    | c.C780G  | p.D260E  | G | C | 0.0% | 0.0% | 0.3% | 0.2% | 1.1% | 1.1% | 1.4% | 13.8% |
| RNF222   | chr17 | exon3  | 8296705   | NM_001146684 | c.G75C   | p.E25D   | C | G | 0.0% | 0.0% | 0.2% | 0.3% | 1.5% | 1.5% | 1.5% | 10.9% |
| RNF26    | chr11 | exon1  | 119206304 | NM_032015    | c.G472A  | p.G158S  | G | A | 0.0% | 0.0% | 0.8% | 0.2% | 1.0% | 0.9% | 1.3% | 10.7% |
| RNFT2    | chr12 | exon7  | 117217030 | NM_032814    | c.G759A  | p.M253I  | G | A | 0.0% | 0.0% | 0.2% | 0.4% | 0.2% | 0.8% | 1.2% | 10.5% |
| RNFT2    | chr12 | exon7  | 117217029 | NM_032814    | c.T758C  | p.M253T  | T | C | 0.0% | 0.0% | 0.0% | 0.6% | 0.2% | 0.8% | 1.2% | 11.0% |
| RSPH6A   | chr19 | exon2  | 46314009  | NM_030785    | c.C740T  | p.T247M  | G | A | 0.0% | 0.0% | 0.1% | 0.0% | 0.4% | 0.8% | 2.0% | 10.6% |
| RSPH6A   | chr19 | exon2  | 46314034  | NM_030785    | c.G715A  | p.V239I  | C | T | 0.0% | 0.0% | 0.2% | 0.3% | 0.9% | 1.0% | 1.9% | 10.8% |
| RTL1     | chr14 | exon1  | 101349420 | NM_001134888 | c.A1706G | p.K569R  | T | C | 0.0% | 0.0% | 0.7% | 0.2% | 0.5% | 0.4% | 1.4% | 10.6% |
| RWDD2A   | chr6  | exon3  | 83905640  | NM_033411    | c.T528A  | p.D176E  | T | A | 0.0% | 0.0% | 0.3% | 0.2% | 0.6% | 1.9% | 1.5% | 10.7% |
| RYR1     | chr19 | exon18 | 38948855  | NM_000540    | c.C2090G | p.A697G  | C | G | 0.0% | 0.0% | 0.6% | 0.2% | 0.3% | 1.2% | 0.0% | 11.4% |
| RYR1     | chr19 | exon18 | 38948828  | NM_000540    | c.C2063G | p.T688S  | C | G | 0.0% | 0.0% | 0.6% | 0.0% | 0.8% | 1.0% | 0.3% | 12.7% |
| RYR1     | chr19 | exon18 | 38948840  | NM_000540    | c.C2075G | p.T692S  | C | G | 0.0% | 0.0% | 0.6% | 0.0% | 0.3% | 1.1% | 0.0% | 12.6% |
| SCNN1A   | chr12 | exon2  | 6483718   | NM_001159575 | c.C301A  | p.Q101K  | G | T | 0.0% | 0.0% | 0.3% | 0.0% | 0.2% | 0.6% | 1.9% | 12.1% |
| SCNN1B   | chr16 | exon2  | 23360011  | NM_000336    | c.G91A   | p.D31N   | G | A | 0.0% | 0.0% | 0.4% | 0.5% | 1.6% | 1.8% | 1.0% | 13.4% |
| SETD5    | chr3  | exon16 | 9490257   | NM_001080517 | c.C2289G | p.I763M  | C | G | 0.0% | 0.0% | 0.3% | 0.0% | 0.2% | 1.9% | 1.5% | 11.8% |
| SGK2     | chr20 | exon10 | 42204969  | NM_016276    | c.A979G  | p.S327G  | A | G | 0.0% | 0.0% | 0.0% | 0.0% | 0.6% | 0.6% | 0.7% | 10.3% |
| SGSM3    | chr22 | exon13 | 40803481  | NM_015705    | c.C1433T | p.S478L  | C | T | 0.0% | 0.0% | 0.7% | 1.4% | 1.4% | 2.0% | 1.8% | 13.8% |
| SHANK2   | chr11 | exon22 | 70333755  | NM_012309    | c.G2452A | p.G818R  | C | T | 0.0% | 0.0% | 0.0% | 0.0% | 0.5% | 0.5% | 0.0% | 12.7% |
| SHANK2   | chr11 | exon22 | 70333749  | NM_012309    | c.C2458T | p.L820F  | G | A | 0.0% | 0.0% | 0.0% | 0.0% | 0.5% | 0.5% | 0.0% | 13.0% |
| SHANK2   | chr11 | exon22 | 70333766  | NM_012309    | c.C2441T | p.P814L  | G | A | 0.0% | 0.0% | 0.0% | 0.0% | 0.5% | 0.5% | 0.0% | 13.3% |
| SHANK2   | chr11 | exon22 | 70333772  | NM_012309    | c.A2435C | p.Q812P  | T | G | 0.0% | 0.0% | 0.0% | 0.0% | 0.5% | 0.4% | 0.0% | 12.9% |
| SHANK2   | chr11 | exon22 | 70333791  | NM_012309    | c.T2416C | p.S806P  | A | G | 0.0% | 0.0% | 0.0% | 0.2% | 0.5% | 0.4% | 0.0% | 12.6% |
| SLC6A20  | chr3  | exon5  | 45812790  | NM_022405    | c.T743C  | p.F248S  | A | G | 0.0% | 0.0% | 0.0% | 0.2% | 1.1% | 1.5% | 0.7% | 10.4% |
| SLC6A9   | chr1  | exon5  | 44474154  | NM_201649    | c.A680C  | p.H227P  | T | G | 0.0% | 0.0% | 0.6% | 0.9% | 0.9% | 1.3% | 1.0% | 11.2% |
| SMOC1    | chr14 | exon11 | 70490043  | NM_001034852 | c.G1170T | p.M390I  | C | T | 0.0% | 0.0% | 0.0% | 0.2% | 1.7% | 1.7% | 1.1% | 10.5% |
| SND1     | chr7  | exon22 | 127729628 | NM_014390    | c.G2506A | p.G836S  | G | A | 0.0% | 0.0% | 0.4% | 0.3% | 1.0% | 1.3% | 1.1% | 11.7% |
| SNRNP200 | chr2  | exon15 | 96959158  | NM_014014    | c.C1932A | p.D644E  | C | T | 0.0% | 0.2% | 0.7% | 0.2% | 0.6% | 1.9% | 0.9% | 14.5% |
| SNRNP200 | chr2  | exon15 | 96959125  | NM_014014    | c.G1965C | p.M655I  | T | G | 0.5% | 0.2% | 0.5% | 0.5% | 0.6% | 1.5% | 0.5% | 11.0% |
| SNX17    | chr2  | exon15 | 27599537  | NM_014748    | c.A1364C | p.D455A  | A | C | 0.0% | 0.0% | 0.0% | 0.1% | 0.2% | 0.4% | 0.2% | 10.9% |
| SNX8     | chr7  | exon2  | 2317839   | NM_013321    | c.C196T  | p.H66Y   | G | A | 0.2% | 0.0% | 0.0% | 0.3% | 0.7% | 1.5% | 1.6% | 12.7% |
| SRGAP2   | chr1  | exon19 | 206632033 | NM_001170637 | c.A2309G | p.E770G  | A | G | 0.1% | 0.1% | 0.2% | 0.0% | 1.2% | 1.2% | 0.8% | 10.3% |
| SRGAP2   | chr1  | exon19 | 206632041 | NM_001170637 | c.C2317T | p.P773S  | C | T | 0.0% | 0.0% | 0.2% | 0.0% | 1.9% | 1.6% | 0.8% | 12.0% |

|         |       |         |           |              |           |           |   |   |      |      |      |      |      |      |      |       |
|---------|-------|---------|-----------|--------------|-----------|-----------|---|---|------|------|------|------|------|------|------|-------|
| SRGAP2  | chr1  | exon19  | 206632083 | NM_001170637 | c.C2359T  | p.P787S   | C | T | 0.1% | 0.0% | 0.0% | 0.0% | 1.7% | 1.1% | 1.3% | 11.0% |
| SRGAP2  | chr1  | exon19  | 206632062 | NM_001170637 | c.A2338G  | p.R780G   | A | G | 0.0% | 0.0% | 0.0% | 0.0% | 1.8% | 1.3% | 1.1% | 11.0% |
| ST7L    | chr1  | exon9   | 113124647 | NM_138728    | c.C1036G  | p.P346A   | G | C | 0.0% | 0.0% | 0.3% | 0.7% | 0.7% | 1.4% | 1.1% | 12.8% |
| SYTL2   | chr11 | exon9   | 85431943  | NM_032943    | c.A1519T  | p.M507L   | T | A | 0.0% | 0.5% | 0.6% | 0.0% | 0.9% | 0.9% | 1.3% | 12.0% |
| TAB2    | chr6  | exon5   | 149700061 | NM_015093    | c.A1010G  | p.N337S   | A | G | 0.0% | 0.0% | 0.4% | 0.1% | 1.1% | 1.5% | 2.0% | 14.0% |
| TCEAL8  | chrX  | exon3   | 102508616 | NM_153333    | c.A292T   | p.M98L    | T | A | 0.0% | 0.0% | 0.7% | 0.0% | 1.1% | 1.4% | 0.8% | 10.8% |
| TCF20   | chr22 | exon1   | 42607204  | NM_005650    | c.T4108G  | p.S1370A  | A | C | 0.0% | 0.0% | 0.3% | 0.0% | 0.9% | 0.4% | 1.2% | 10.2% |
| TET3    | chr2  | exon1   | 74274176  | NM_144993    | c.C727T   | p.P243S   | C | T | 0.1% | 0.0% | 0.5% | 0.2% | 2.0% | 1.6% | 1.7% | 11.4% |
| TMEM180 | chr10 | exon8   | 104233371 | NM_024789    | c.T970C   | p.S324P   | T | C | 0.1% | 0.0% | 0.7% | 0.1% | 1.1% | 0.9% | 1.2% | 10.9% |
| TMEM64  | chr8  | exon1   | 91657447  | NM_001146273 | c.G687C   | p.E229D   | C | G | 0.0% | 0.0% | 0.6% | 1.6% | 1.4% | 1.7% | 0.6% | 13.0% |
| TMEM64  | chr8  | exon1   | 91657454  | NM_001146273 | c.G680A   | p.S227N   | C | T | 0.0% | 0.0% | 1.1% | 1.6% | 1.4% | 1.7% | 1.3% | 13.6% |
| TNRC6B  | chr22 | exon5   | 40662599  | NM_015088    | c.G2365A  | p.A789T   | G | A | 0.0% | 0.0% | 0.5% | 1.6% | 1.6% | 2.0% | 1.9% | 15.4% |
| TPP2    | chr13 | exon13  | 103288598 | NM_003291    | c.G1534A  | p.V512I   | G | A | 0.0% | 0.0% | 0.0% | 0.3% | 0.0% | 0.5% | 0.5% | 11.1% |
| TSSK1B  | chr5  | exon1   | 112770071 | NM_032028    | c.A466G   | p.S156G   | T | C | 0.0% | 0.0% | 0.7% | 0.3% | 1.9% | 1.8% | 1.0% | 11.6% |
| TTN     | chr2  | exon127 | 179458058 | NM_003319    | c.C31682T | p.A10561V | G | A | 0.0% | 0.0% | 0.3% | 0.0% | 0.7% | 1.5% | 1.3% | 12.0% |
| TTN     | chr2  | exon164 | 179415860 | NM_003319    | c.A64203C | p.E21401D | T | G | 0.4% | 0.0% | 0.0% | 0.3% | 0.8% | 1.4% | 1.7% | 11.9% |
| TTN     | chr2  | exon164 | 179415864 | NM_003319    | c.A64199G | p.N21400S | T | C | 0.0% | 0.0% | 0.0% | 0.3% | 0.9% | 1.9% | 1.4% | 11.6% |
| TTN     | chr2  | exon153 | 179441424 | NM_003319    | c.A42352G | p.S14118G | T | C | 0.1% | 0.0% | 0.2% | 0.5% | 1.6% | 1.8% | 1.4% | 11.6% |
| TTN     | chr2  | exon74  | 179587114 | NM_133378    | c.C18668T | p.T6223I  | G | A | 0.0% | 0.0% | 1.2% | 0.3% | 0.5% | 1.7% | 1.8% | 12.4% |
| UBN2    | chr7  | exon15  | 138969124 | NM_173569    | c.T3473C  | p.V1158A  | T | C | 0.1% | 0.0% | 1.0% | 0.5% | 0.2% | 1.5% | 1.6% | 11.5% |
| UNC13B  | chr9  | exon14  | 35376157  | NM_006377    | c.A1501C  | p.I501L   | A | C | 0.0% | 0.0% | 1.7% | 1.7% | 1.7% | 1.6% | 1.7% | 11.5% |
| UNC45A  | chr15 | exon7   | 91479610  | NM_001039675 | c.C301A   | p.Q101K   | C | A | 0.0% | 0.0% | 0.0% | 0.3% | 0.9% | 1.6% | 1.4% | 14.3% |
| UNC5A   | chr5  | exon14  | 176306442 | NM_133369    | c.G2316C  | p.R772S   | G | C | 0.0% | 0.0% | 0.6% | 0.0% | 0.7% | 0.9% | 1.0% | 10.6% |
| UROC1   | chr3  | exon12  | 126219599 | NM_001165974 | c.A1264T  | p.T422S   | T | A | 0.0% | 0.0% | 0.0% | 0.0% | 1.7% | 0.9% | 1.7% | 10.8% |
| USP24   | chr1  | exon5   | 55637255  | NM_015306    | c.G799A   | p.V267I   | C | T | 0.0% | 0.0% | 0.2% | 0.2% | 0.7% | 1.7% | 1.9% | 11.3% |
| VWA5B2  | chr3  | exon11  | 183955086 | NM_138345    | c.A1606G  | p.T536A   | A | G | 0.0% | 0.0% | 0.5% | 0.2% | 0.3% | 1.7% | 1.0% | 12.8% |
| WNT16   | chr7  | exon3   | 120971860 | NM_016087    | c.G445C   | p.A149P   | G | C | 0.0% | 0.0% | 0.0% | 0.5% | 0.9% | 1.9% | 0.5% | 12.9% |
| XRN2    | chr20 | exon30  | 21369966  | NM_012255    | c.A2843G  | p.N948S   | A | G | 0.0% | 0.0% | 0.0% | 0.5% | 0.4% | 1.2% | 0.9% | 9.8%  |
| YOD1    | chr1  | exon2   | 207222492 | NM_018566    | c.G920A   | p.R307K   | C | T | 0.0% | 0.0% | 0.5% | 0.5% | 1.1% | 1.8% | 1.8% | 13.3% |
| ZFHX2   | chr14 | exon3   | 24001988  | NM_033400    | c.G2347A  | p.A783T   | C | T | 0.0% | 0.0% | 0.0% | 2.0% | 1.6% | 1.8% | 1.6% | 15.8% |
| ZNF609  | chr15 | exon6   | 64972488  | NM_015042    | c.T3874G  | p.S1292A  | T | G | 0.0% | 0.0% | 0.0% | 0.1% | 0.7% | 0.9% | 1.0% | 10.6% |
| ZNF609  | chr15 | exon6   | 64972480  | NM_015042    | c.C3866G  | p.T1289S  | C | G | 0.0% | 0.0% | 0.0% | 0.1% | 0.6% | 0.9% | 0.9% | 9.9%  |
| ZNF688  | chr16 | exon2   | 30582361  | NM_145271    | c.A280G   | p.K94E    | T | C | 0.0% | 0.0% | 0.2% | 0.4% | 0.8% | 1.5% | 1.9% | 11.4% |

**Table S12.** SNVs in clonally derived tumors from CT38

| Gene   | CHR   | Location | Position   | Type              | NCBI Ref     | Coding   | Protein  | RS         | Ref. Allele | Var. Allele | Variant Allele Frequency (%) |                      |
|--------|-------|----------|------------|-------------------|--------------|----------|----------|------------|-------------|-------------|------------------------------|----------------------|
|        |       |          |            |                   |              |          |          |            |             |             | Type I derived tumor         | Type V derived tumor |
| BRCA1  | chr17 | exon10   | 41,244,000 | nonsynonymous SNV | NM_007300    | c.A3548G | p.K1183R | rs16942    | T           | C           | 68.4%                        | 70.0%                |
| BRCA1  | chr17 | exon10   | 41,244,936 | nonsynonymous SNV | NM_007300    | c.C2612T | p.P871L  | rs799917   | G           | A           | 30.0%                        | 17.3%                |
| CDH1   | chr16 | exon13   | 68,857,441 | synonymous SNV    | NM_004360    | c.T2076C | p.A692A  | rs1801552  | T           | C           | 99.4%                        | 99.0%                |
| CDKN2A | chr9  | UTR3     | 21,968,199 |                   |              |          |          | rs11515    | C           | G           | 40.0%                        | 24.4%                |
| EGFR   | chr7  | exon20   | 55,249,063 | synonymous SNV    | NM_005228    | c.G2361A | p.Q787Q  | rs1050171  | G           | A           | 48.3%                        | 47.1%                |
| EGFR   | chr7  | exon25   | 55,268,916 | synonymous SNV    | NM_005228    | c.C2982T | p.D994D  | rs2293347  | C           | T           | 39.7%                        | 36.5%                |
| FGFR3  | chr4  | exon12   | 1,807,894  | synonymous SNV    | NM_022965    | c.G1617A | p.T539T  | rs7688609  | G           | A           | 99.5%                        | 99.5%                |
| FGFR3  | chr4  | exon9    | 1,806,131  | nonsynonymous SNV | NM_001163213 | c.T1156C | p.F386L  | rs17881656 | T           | C           | 47.1%                        | 45.7%                |
| FLT3   | chr13 | intronic | 28,610,183 |                   |              |          |          | rs2491231  | A           | G           | 99.9%                        | 99.9%                |
| FLT3   | chr13 | intronic | 28,589,267 |                   |              |          |          | rs4073630  | C           | T           | 46.5%                        | 38.5%                |
| MLH1   | chr3  | exon8    | 37,053,568 | nonsynonymous SNV | NM_000249    | c.A655G  | p.I219V  | rs1799977  | A           | G           | 36.8%                        | 31.6%                |
| MLH1   | chr3  | intronic | 37,083,740 |                   |              |          |          | rs9876116  | A           | G           | 48.1%                        | 39.2%                |
| NF1    | chr17 | intronic | 29,654,876 |                   |              |          |          | rs2285894  | T           | A           | 51.6%                        | 47.5%                |
| PDGFRA | chr4  | exon23   | 55,161,391 | synonymous SNV    | NM_006206    | c.T3222C | p.D1074D | rs7685117  | T           | C           | 99.8%                        | 99.9%                |
| RET    | chr10 | exon13   | 43,613,843 | synonymous SNV    | NM_020630    | c.G2307T | p.L769L  | rs1800861  | G           | T           | 100.0%                       | 98.9%                |
| TP53   | chr17 | exon4    | 7,579,472  | nonsynonymous SNV | NM_001126114 | c.C215G  | p.P72R   | rs1042522  | G           | C           | 99.6%                        | 99.8%                |
| TP53   | chr17 | intronic | 7,579,801  |                   |              |          |          | rs1642785  | G           | C           | 99.2%                        | 99.1%                |



**Table S13.** SNVs in clonally derived tumors from CT59

| Gene   | CHR   | Location | Position    | Type              | NCBI Ref     | Coding   | Protein  | RS          | Ref. Allele | Var. Allele | Variant Allele Frequency (%) |                       |
|--------|-------|----------|-------------|-------------------|--------------|----------|----------|-------------|-------------|-------------|------------------------------|-----------------------|
|        |       |          |             |                   |              |          |          |             |             |             | Type I derived tumor         | Type II derived tumor |
| APC    | chr5  | exon12   | 112,162,855 | nonsynonymous SNV | NM_000038    | c.G1459A | p.G487R  |             | G           | A           | 19.2%                        | 21.3%                 |
| APC    | chr5  | exon12   | 112,162,854 | synonymous SNV    | NM_000038    | c.T1458C | p.Y486Y  | rs2229992   | T           | C           | 99.8%                        | 99.6%                 |
| APC    | chr5  | exon16   | 112,176,325 | synonymous SNV    | NM_000038    | c.G5034A | p.G1678G | rs42427     | G           | A           | 99.2%                        | 99.1%                 |
| BRAF   | chr7  | exon15   | 140,453,136 | nonsynonymous SNV | NM_004333    | c.T1799A | p.V600E  | rs113488022 | A           | T           | 65.3%                        | 68.6%                 |
| CDH1   | chr16 | intronic | 68,771,372  |                   |              |          |          | rs3743674   | C           | T           | 100.0%                       | 97.4%                 |
| CDH1   | chr16 | exon13   | 68,857,441  | synonymous SNV    | NM_004360    | c.T2076C | p.A692A  | rs1801552   | T           | C           | 99.4%                        | 99.7%                 |
| CDKN2A | chr9  | UTR3     | 21,968,199  |                   |              |          |          | rs11515     | C           | G           | 100.0%                       | 100.0%                |
| EGFR   | chr7  | exon20   | 55,249,063  | synonymous SNV    | NM_005228    | c.G2361A | p.Q787Q  | rs1050171   | G           | A           | 99.4%                        | 99.3%                 |
| FBXW7  | chr4  | exon3    | 153,268,144 | stopgain SNV      | NM_001013415 | c.C310T  | p.R104X  |             | G           | A           | 50.2%                        | 54.3%                 |
| FBXW7  | chr4  | exon9    | 153,247,224 | nonsynonymous SNV | NM_001013415 | c.G1224T | p.W408C  |             | C           | A           | 46.2%                        | 55.3%                 |
| FGFR2  | chr10 | exon6    | 123,298,158 | synonymous SNV    | NM_001144917 | c.A696G  | p.V232V  | rs1047100   | T           | C           | 52.7%                        | 44.6%                 |
| FGFR3  | chr4  | exon12   | 1,807,894   | synonymous SNV    | NM_022965    | c.G1617A | p.T539T  | rs7688609   | G           | A           | 99.6%                        | 99.9%                 |
| FLT3   | chr13 | intronic | 28,610,183  |                   |              |          |          | rs2491231   | A           | G           | 99.5%                        | 99.9%                 |
| HRAS   | chr11 | exon2    | 534,270     | nonsynonymous SNV | NM_176795    | c.C53T   | p.A18V   |             | G           | A           | 48.5%                        | 50.6%                 |
| JAK2   | chr9  | exon6    | 5,050,706   | synonymous SNV    | NM_004972    | c.C489T  | p.H163H  | rs10429491  | C           | T           | 99.4%                        | 99.7%                 |
| KIT    | chr4  | exon20   | 55,603,362  | synonymous SNV    | NM_001093772 | c.C2706T | p.C902C  |             | C           | T           | 53.5%                        | 60.0%                 |
| NF1    | chr17 | intronic | 29,654,876  |                   |              |          |          | rs2285894   | T           | A           | 99.4%                        | 99.7%                 |
| PDGFRA | chr4  | exon23   | 55,161,391  | synonymous SNV    | NM_006206    | c.T3222C | p.D1074D | rs7685117   | T           | C           | 99.9%                        | 99.8%                 |
| PDGFRA | chr4  | exon18   | 55,152,040  | synonymous SNV    | NM_006206    | c.C2472T | p.V824V  | rs2228230   | C           | T           | 47.7%                        | 47.4%                 |
| PDGFRA | chr4  | exon10   | 55,139,771  | nonsynonymous SNV | NM_006206    | c.T1432C | p.S478P  | rs35597368  | T           | C           | 50.9%                        | 45.4%                 |
| PDGFRA | chr4  | exon12   | 55,141,054  | nonsynonymous SNV | NM_006206    | c.C1700T | p.P567L  |             | C           | T           | 50.7%                        | 51.6%                 |
| PIK3CA | chr3  | intronic | 178,922,274 |                   |              |          |          | rs2699896   | C           | A           | 100.0%                       | 99.0%                 |
| RB1    | chr13 | intronic | 48,919,358  |                   |              |          |          | rs198617    | T           | G           | 99.4%                        | 100.0%                |
| RET    | chr10 | exon13   | 43,613,843  | synonymous SNV    | NM_020975    | c.G2307T | p.L769L  | rs1800861   | G           | T           | 100.0%                       | 100.0%                |
| TP53   | chr17 | intronic | 7,579,801   |                   |              |          |          | rs1642785   | G           | C           | 98.5%                        | 99.0%                 |
| TP53   | chr17 | exon4    | 7,579,472   | nonsynonymous SNV | NM_001126114 | c.C215G  | p.P72R   | rs1042522   | G           | C           | 99.6%                        | 99.6%                 |
| TP53   | chr17 | exon8    | 7,577,090   | nonsynonymous SNV | NM_001126114 | c.G848A  | p.R283H  |             | C           | T           | 48.0%                        | 52.8%                 |
| TP53   | chr17 | exon5    | 7,578,430   | nonsynonymous SNV | NM_001126114 | c.A500C  | p.Q167P  |             | T           | G           | 25.8%                        | 27.0%                 |
| TP53   | chr17 | exon6    | 7,578,263   | stopgain SNV      | NM_001126114 | c.C586T  | p.R196X  |             | G           | A           | 49.8%                        | 47.6%                 |

## References

1. M. Greaves, C. C. Maley, Clonal evolution in cancer. *Nature* **481**, 306 (2012).  
[doi:10.1038/nature10762](https://doi.org/10.1038/nature10762) [Medline](#)
2. S. Nik-Zainal *et al.*; Breast Cancer Working Group of the International Cancer Genome Consortium, The life history of 21 breast cancers. *Cell* **149**, 994 (2012).  
[doi:10.1016/j.cell.2012.04.023](https://doi.org/10.1016/j.cell.2012.04.023) [Medline](#)
3. M. Gerlinger *et al.*, Intratumor heterogeneity and branched evolution revealed by multiregion sequencing. *N. Engl. J. Med.* **366**, 883 (2012). [doi:10.1056/NEJMoa1113205](https://doi.org/10.1056/NEJMoa1113205) [Medline](#)
4. K. Anderson *et al.*, Genetic variegation of clonal architecture and propagating cells in leukaemia. *Nature* **469**, 356 (2011). [doi:10.1038/nature09650](https://doi.org/10.1038/nature09650) [Medline](#)
5. F. Notta *et al.*, Evolution of human BCR-ABL1 lymphoblastic leukaemia-initiating cells. *Nature* **469**, 362 (2011). [doi:10.1038/nature09733](https://doi.org/10.1038/nature09733) [Medline](#)
6. E. Clappier *et al.*, Clonal selection in xenografted human T cell acute lymphoblastic leukemia recapitulates gain of malignancy at relapse. *J. Exp. Med.* **208**, 653 (2011).  
[doi:10.1084/jem.20110105](https://doi.org/10.1084/jem.20110105) [Medline](#)
7. C. G. Mullighan *et al.*, Genomic analysis of the clonal origins of relapsed acute lymphoblastic leukemia. *Science* **322**, 1377 (2008). [doi:10.1126/science.1164266](https://doi.org/10.1126/science.1164266) [Medline](#)
8. X. Wu *et al.*, Clonal selection drives genetic divergence of metastatic medulloblastoma. *Nature* **482**, 529 (2012). [doi:10.1038/nature10825](https://doi.org/10.1038/nature10825) [Medline](#)
9. W. Liu *et al.*, Copy number analysis indicates monoclonal origin of lethal metastatic prostate cancer. *Nat. Med.* **15**, 559 (2009). [doi:10.1038/nm.1944](https://doi.org/10.1038/nm.1944) [Medline](#)
10. M. E. Gorre *et al.*, Clinical resistance to STI-571 cancer therapy caused by BCR-ABL gene mutation or amplification. *Science* **293**, 876 (2001). [doi:10.1126/science.1062538](https://doi.org/10.1126/science.1062538)  
[Medline](#)
11. C. Roche-Lestienne, J. L. Lai, S. Darré, T. Facon, C. Preudhomme, A mutation conferring resistance to imatinib at the time of diagnosis of chronic myelogenous leukemia. *N. Engl. J. Med.* **348**, 2265 (2003). [doi:10.1056/NEJMc035089](https://doi.org/10.1056/NEJMc035089) [Medline](#)

12. M. J. Bissell, M. A. Labarge, Context, tissue plasticity, and cancer: Are tumor stem cells also regulated by the microenvironment? *Cancer Cell* **7**, 17 (2005). [doi:10.1016/S1535-6108\(04\)00375-7](https://doi.org/10.1016/S1535-6108(04)00375-7) [Medline](#)
13. V. Sanz-Moreno *et al.*, Rac activation and inactivation control plasticity of tumor cell movement. *Cell* **135**, 510 (2008). [doi:10.1016/j.cell.2008.09.043](https://doi.org/10.1016/j.cell.2008.09.043) [Medline](#)
14. S. L. Spencer, S. Gaudet, J. G. Albeck, J. M. Burke, P. K. Sorger, Non-genetic origins of cell-to-cell variability in TRAIL-induced apoptosis. *Nature* **459**, 428 (2009). [doi:10.1038/nature08012](https://doi.org/10.1038/nature08012) [Medline](#)
15. A. Roesch *et al.*, A temporarily distinct subpopulation of slow-cycling melanoma cells is required for continuous tumor growth. *Cell* **141**, 583 (2010). [doi:10.1016/j.cell.2010.04.020](https://doi.org/10.1016/j.cell.2010.04.020) [Medline](#)
16. S. V. Sharma *et al.*, A chromatin-mediated reversible drug-tolerant state in cancer cell subpopulations. *Cell* **141**, 69 (2010). [doi:10.1016/j.cell.2010.02.027](https://doi.org/10.1016/j.cell.2010.02.027) [Medline](#)
17. P. B. Gupta *et al.*, Stochastic state transitions give rise to phenotypic equilibrium in populations of cancer cells. *Cell* **146**, 633 (2011). [doi:10.1016/j.cell.2011.07.026](https://doi.org/10.1016/j.cell.2011.07.026) [Medline](#)
18. K. Ishizawa *et al.*, Tumor-initiating cells are rare in many human tumors. *Cell Stem Cell* **7**, 279 (2010). [doi:10.1016/j.stem.2010.08.009](https://doi.org/10.1016/j.stem.2010.08.009) [Medline](#)
19. P. N. Kelly, A. Dakic, J. M. Adams, S. L. Nutt, A. Strasser, Tumor growth need not be driven by rare cancer stem cells. *Science* **317**, 337 (2007). [doi:10.1126/science.1142596](https://doi.org/10.1126/science.1142596) [Medline](#)
20. S. Jones *et al.*, Comparative lesion sequencing provides insights into tumor evolution. *Proc. Natl. Acad. Sci. U.S.A.* **105**, 4283 (2008). [doi:10.1073/pnas.0712345105](https://doi.org/10.1073/pnas.0712345105) [Medline](#)
21. A. Marusyk, V. Almendro, K. Polyak, Intra-tumour heterogeneity: A looking glass for cancer? *Nat. Rev. Cancer* **12**, 323 (2012). [doi:10.1038/nrc3261](https://doi.org/10.1038/nrc3261) [Medline](#)
22. M. Kærn, T. C. Elston, W. J. Blake, J. J. Collins, Stochasticity in gene expression: From theories to phenotypes. *Nat. Rev. Genet.* **6**, 451 (2005). [doi:10.1038/nrg1615](https://doi.org/10.1038/nrg1615) [Medline](#)
23. M. Loreau *et al.*, Biodiversity and ecosystem functioning: Current knowledge and future challenges. *Science* **294**, 804 (2001). [doi:10.1126/science.1064088](https://doi.org/10.1126/science.1064088) [Medline](#)

24. D. F. Flynn, N. Mirotnick, M. Jain, M. I. Palmer, S. Naeem, Functional and phylogenetic diversity as predictors of biodiversity—ecosystem-function relationships. *Ecology* **92**, 1573 (2011). [doi:10.1890/10-1245.1](https://doi.org/10.1890/10-1245.1) [Medline](#)
25. H. B. Fraser, A. E. Hirsh, G. Giaever, J. Kumm, M. B. Eisen, Noise minimization in eukaryotic gene expression. *PLoS Biol.* **2**, e137 (2004).  
[doi:10.1371/journal.pbio.0020137](https://doi.org/10.1371/journal.pbio.0020137) [Medline](#)
26. H. L. True, S. L. Lindquist, A yeast prion provides a mechanism for genetic variation and phenotypic diversity. *Nature* **407**, 477 (2000). [doi:10.1038/35035005](https://doi.org/10.1038/35035005) [Medline](#)
27. J. M. Raser, E. K. O’Shea, Control of stochasticity in eukaryotic gene expression. *Science* **304**, 1811 (2004). [doi:10.1126/science.1098641](https://doi.org/10.1126/science.1098641) [Medline](#)
28. K. Lewis, Persister cells, dormancy and infectious disease. *Nat. Rev. Microbiol.* **5**, 48 (2007).  
[doi:10.1038/nrmicro1557](https://doi.org/10.1038/nrmicro1557) [Medline](#)
29. A. M. Abulafi, N. S. Williams, Local recurrence of colorectal cancer: The problem, mechanisms, management and adjuvant therapy. *Br. J. Surg.* **81**, 7 (1994).  
[doi:10.1002/bjs.1800810106](https://doi.org/10.1002/bjs.1800810106) [Medline](#)
30. J. M. Raser, E. K. O’Shea, Noise in gene expression: Origins, consequences, and control. *Science* **309**, 2010 (2005). [doi:10.1126/science.1105891](https://doi.org/10.1126/science.1105891) [Medline](#)
31. G. Guenechea *et al.*, Transduction of human CD34<sup>+</sup> CD38<sup>-</sup> bone marrow and cord blood-derived SCID-repopulating cells with third-generation lentiviral vectors. *Mol. Ther.* **1**, 566 (2000). [doi:10.1006/mthe.2000.0077](https://doi.org/10.1006/mthe.2000.0077) [Medline](#)
32. A. Kreso, C. A. O’Brien, *Curr. Protoc. Stem Cell Biol.* Chap. 3, Unit 3 1 (2008).
33. S. Pounds *et al.*, Reference alignment of SNP microarray signals for copy number analysis of tumors. *Bioinformatics* **25**, 315 (2009). [doi:10.1093/bioinformatics/btn624](https://doi.org/10.1093/bioinformatics/btn624) [Medline](#)
34. A. B. Olshen, E. S. Venkatraman, R. Lucito, M. Wigler, Circular binary segmentation for the analysis of array-based DNA copy number data. *Biostatistics* **5**, 557 (2004).  
[doi:10.1093/biostatistics/kxh008](https://doi.org/10.1093/biostatistics/kxh008) [Medline](#)
35. C. Li, W. Hung Wong, *Genome Biol.* **2**, RESEARCH0032 (2001).

36. O. Harismendy *et al.*, Detection of low prevalence somatic mutations in solid tumors with ultra-deep targeted sequencing. *Genome Biol.* **12**, R124 (2011). [doi:10.1186/gb-2011-12-12-r124](https://doi.org/10.1186/gb-2011-12-12-r124) [Medline](#)
37. R. Tewhey *et al.*, Microdroplet-based PCR enrichment for large-scale targeted sequencing. *Nat. Biotechnol.* **27**, 1025 (2009). [doi:10.1038/nbt.1583](https://doi.org/10.1038/nbt.1583) [Medline](#)
38. M. A. DePristo *et al.*, A framework for variation discovery and genotyping using next-generation DNA sequencing data. *Nat. Genet.* **43**, 491 (2011). [doi:10.1038/ng.806](https://doi.org/10.1038/ng.806) [Medline](#)
39. K. Wang, M. Li, H. Hakonarson, ANNOVAR: Functional annotation of genetic variants from high-throughput sequencing data. *Nucleic Acids Res.* **38**, e164 (2010). [doi:10.1093/nar/gkq603](https://doi.org/10.1093/nar/gkq603) [Medline](#)
40. K. D. Siegmund, P. Marjoram, S. Tavaré, D. Shibata, High DNA methylation pattern intratumoral diversity implies weak selection in many human colorectal cancers. *PLoS ONE* **6**, e21657 (2011). [doi:10.1371/journal.pone.0021657](https://doi.org/10.1371/journal.pone.0021657) [Medline](#)
41. A. G. Uren *et al.*, A high-throughput splinkerette-PCR method for the isolation and sequencing of retroviral insertion sites. *Nat. Protoc.* **4**, 789 (2009). [doi:10.1038/nprot.2009.64](https://doi.org/10.1038/nprot.2009.64) [Medline](#)
42. D. M. Muzny *et al.*; Cancer Genome Atlas Network, Comprehensive molecular characterization of human colon and rectal cancer. *Nature* **487**, 330 (2012). [doi:10.1038/nature11252](https://doi.org/10.1038/nature11252) [Medline](#)
43. D. Shibata, Inferring human stem cell behaviour from epigenetic drift. *J. Pathol.* **217**, 199 (2009). [doi:10.1002/path.2461](https://doi.org/10.1002/path.2461) [Medline](#)
44. J. E. Dick, M. C. Magli, D. Huszar, R. A. Phillips, A. Bernstein, Introduction of a selectable gene into primitive stem cells capable of long-term reconstitution of the hemopoietic system of W/W<sup>v</sup> mice. *Cell* **42**, 71 (1985). [doi:10.1016/S0092-8674\(85\)80102-1](https://doi.org/10.1016/S0092-8674(85)80102-1) [Medline](#)
45. G. Keller, C. Paige, E. Gilboa, E. F. Wagner, Expression of a foreign gene in myeloid and lymphoid cells derived from multipotent haematopoietic precursors. *Nature* **318**, 149 (1985). [doi:10.1038/318149a0](https://doi.org/10.1038/318149a0) [Medline](#)

46. I. R. Lemischka, D. H. Raulet, R. C. Mulligan, Developmental potential and dynamic behavior of hematopoietic stem cells. *Cell* **45**, 917 (1986). [doi:10.1016/0092-8674\(86\)90566-0](https://doi.org/10.1016/0092-8674(86)90566-0) [Medline](#)
47. J. E. Dick, Stem cell concepts renew cancer research. *Blood* **112**, 4793 (2008). [doi:10.1182/blood-2008-08-077941](https://doi.org/10.1182/blood-2008-08-077941) [Medline](#)
48. J. L. McKenzie, O. I. Gan, M. Doedens, J. C. Wang, J. E. Dick, Individual stem cells with highly variable proliferation and self-renewal properties comprise the human hematopoietic stem cell compartment. *Nat. Immunol.* **7**, 1225 (2006). [doi:10.1038/ni1393](https://doi.org/10.1038/ni1393) [Medline](#)
49. C. A. O'Brien, A. Pollett, S. Gallinger, J. E. Dick, A human colon cancer cell capable of initiating tumour growth in immunodeficient mice. *Nature* **445**, 106 (2007). [doi:10.1038/nature05372](https://doi.org/10.1038/nature05372) [Medline](#)
50. L. Ricci-Vitiani *et al.*, Identification and expansion of human colon-cancer-initiating cells. *Nature* **445**, 111 (2007). [doi:10.1038/nature05384](https://doi.org/10.1038/nature05384) [Medline](#)
51. P. Dalerba *et al.*, Phenotypic characterization of human colorectal cancer stem cells. *Proc. Natl. Acad. Sci. U.S.A.* **104**, 10158 (2007). [doi:10.1073/pnas.0703478104](https://doi.org/10.1073/pnas.0703478104) [Medline](#)
52. M. Todaro *et al.*, Colon cancer stem cells dictate tumor growth and resist cell death by production of interleukin-4. *Cell Stem Cell* **1**, 389 (2007). [doi:10.1016/j.stem.2007.08.001](https://doi.org/10.1016/j.stem.2007.08.001) [Medline](#)
53. N. Haraguchi *et al.*, CD133<sup>+</sup>CD44<sup>+</sup> population efficiently enriches colon cancer initiating cells. *Ann. Surg. Oncol.* **15**, 2927 (2008). [doi:10.1245/s10434-008-0074-0](https://doi.org/10.1245/s10434-008-0074-0)
54. P. Chu *et al.*, Characterization of a subpopulation of colon cancer cells with stem cell-like properties. *Int. J. Cancer* **124**, 1312 (2009). [doi:10.1002/ijc.24061](https://doi.org/10.1002/ijc.24061) [Medline](#)
55. E. H. Huang *et al.*, Aldehyde dehydrogenase 1 is a marker for normal and malignant human colonic stem cells (SC) and tracks SC overpopulation during colon tumorigenesis. *Cancer Res.* **69**, 3382 (2009). [doi:10.1158/0008-5472.CAN-08-4418](https://doi.org/10.1158/0008-5472.CAN-08-4418) [Medline](#)

56. C. A. O'Brien *et al.*, ID1 and ID3 regulate the self-renewal capacity of human colon cancer-initiating cells through p21. *Cancer Cell* **21**, 777 (2012). [doi:10.1016/j.ccr.2012.04.036](https://doi.org/10.1016/j.ccr.2012.04.036)  
[Medline](#)
